# Supplementary material
Source: publisher figshare collection journal article supplement (https://diabetesjournals.figshare.com/ndownloader/files/34172169)
Supplement: Supplementary file 1 [file 34172169]

## Sheet: Sheet1
Table S2. Two sample MR results using directly matched cis-pQTLs from five large proteomic studies and a large GWAS on BMI-unadjusted adult type 2 diabetes.
Protein	rs number cis-pQTL	Method	# of SNP	EAF	MR Beta	SE	P value	MR OR	95%CI lower bound	95%CI upper bound	R2	F statistic	Source
MANSC4	rs11049131	Wald ratio	1	0.771	-0.0798065	0.00918984	3.81e-18	0.923295	0.906813	0.940076	0.241508	1018.26	Emilsson
ABO	rs492488	Wald ratio	1	0.739	2.95e-05	4.87e-06	1.39e-09	1.00003	1.00002	1.00004	0.822282	14796.8	Emilsson
TYRO3	rs2289743	Wald ratio	1	0.691	0.26087	0.0434783	1.97e-09	1.29806	1.19202	1.41353	0.0110693	35.7957	Emilsson
CDK2AP1	rs2510885	Wald ratio	1	0.752	-0.370968	0.0620968	2.31e-09	0.690066	0.610988	0.779379	0.00573512	18.4467	Emilsson
CCNH	rs7719891	Wald ratio	1	0.763	-0.325203	0.0585366	2.77e-08	0.722381	0.644078	0.810202	0.00547158	17.5944	Emilsson
MANBA	rs223489	Wald ratio	1	0.662	-0.0805369	0.0147651	4.91e-08	0.922621	0.896303	0.949711	0.0894169	314.035	Emilsson
TBCE	rs10802708	Wald ratio	1	0.648	-0.233766	0.0428571	4.91e-08	0.791547	0.727773	0.860909	0.010819	34.9777	Emilsson
ACE	rs4344	Wald ratio	1	0.499	-0.0548885	0.0109777	5.73e-07	0.946591	0.926441	0.967178	0.169944	654.751	Emilsson
ATF6B	rs114887538	Wald ratio	1	0.764	0.144068	0.0300847	1.68e-06	1.15496	1.08883	1.22511	0.0200844	65.5464	Emilsson
DBNL	rs3087367	Wald ratio	1	0.556	-0.13615	0.0300469	5.86e-06	0.872712	0.8228	0.925651	0.0223999	73.2764	Emilsson
SHBG	rs858519	Wald ratio	1	0.474	-0.130841	0.0299065	1.21e-05	0.877357	0.827408	0.930322	0.0228361	74.7365	Emilsson
ARG1	rs2781668	Wald ratio	1	0.795	-0.228395	0.0524691	1.34e-05	0.79581	0.718037	0.882007	0.00855423	27.5925	Emilsson
TNFRSF6B	rs1056441	Wald ratio	1	0.609	0.205674	0.0482269	2e-05	1.22835	1.11756	1.35013	0.00946809	30.5684	Emilsson
MAPK3	rs28529403	Wald ratio	1	0.402	0.238938	0.0575221	3.27e-05	1.2699	1.1345	1.42146	0.00613923	19.7545	Emilsson
HP	rs77303550	Wald ratio	1	0.818	-0.0387244	0.00933941	3.38e-05	0.962016	0.944566	0.979788	0.229532	952.725	Emilsson
NELL1	rs16907058	Wald ratio	1	0.949	0.0586451	0.0141557	3.43e-05	1.0604	1.03138	1.09023	0.0946802	334.453	Emilsson
NEO1	rs8026121	Wald ratio	1	0.555	-0.152047	0.0380117	6.33e-05	0.858948	0.79728	0.925386	0.0144436	46.8675	Emilsson
FGFBP3	rs11186737	Wald ratio	1	0.746	-0.089404	0.0228477	9.11e-05	0.914476	0.874428	0.956358	0.0345634	114.491	Emilsson
CRK	rs8079811	Wald ratio	1	0.673	-0.254902	0.0666667	0.000131555	0.774992	0.680064	0.883172	0.00457924	14.7118	Emilsson
CHKB	rs116947359	Wald ratio	1	0.934	-0.184211	0.0488722	0.000163751	0.831761	0.755784	0.915375	0.00872337	28.1428	Emilsson
CALCOCO2	rs550510	Wald ratio	1	0.843	-0.173684	0.0473684	0.000245733	0.840562	0.766036	0.922339	0.00955574	30.8541	Emilsson
MICA	rs116423065	Wald ratio	1	0.876	-0.0517241	0.0147783	0.000465258	0.949591	0.92248	0.977498	0.143241	534.672	Emilsson
NRXN3	rs2370901	Wald ratio	1	0.654	-0.121693	0.0349206	0.000492416	0.88542	0.826845	0.948144	0.0161662	52.549	Emilsson
GSN	rs76331566	Wald ratio	1	0.969	-0.130653	0.0376884	0.000526955	0.877522	0.815036	0.944798	0.0095166	30.7265	Emilsson
HIBCH	rs291447	Wald ratio	1	0.393	-0.0348653	0.0101426	0.000587111	0.965735	0.946727	0.985126	0.189963	749.97	Emilsson
ITIH4	rs2239547	Wald ratio	1	0.72	-0.170213	0.0503546	0.000724116	0.843485	0.764214	0.93098	0.00801602	25.8424	Emilsson
BOC	rs73235147	Wald ratio	1	0.833	0.116183	0.0344398	0.000742207	1.1232	1.04988	1.20164	0.0161594	52.5266	Emilsson
CDON	rs60929339	Wald ratio	1	0.928	-0.0539359	0.016035	0.000769228	0.947493	0.918178	0.977744	0.0628867	214.608	Emilsson
PARK7	rs34878017	Wald ratio	1	0.824	-0.178344	0.0541401	0.000987312	0.836655	0.752422	0.930318	0.00714939	23.0284	Emilsson
ENTPD5	rs17094448	Wald ratio	1	0.946	-4.17e-05	1.27e-05	0.00101724	0.999958	0.999933	0.999983	0.123623	451.116	Emilsson
KLC1	rs56168984	Wald ratio	1	0.658	0.196429	0.0598214	0.00102497	1.21705	1.0824	1.36845	0.0056457	18.1575	Emilsson
ICAM1	rs901886	Wald ratio	1	0.47	1.96e-05	5.97e-06	0.00103348	1.00002	1.00001	1.00003	0.570389	4245.95	Emilsson
LEPR	rs6658330	Wald ratio	1	0.812	1.96e-05	6.04e-06	0.00114189	1.00002	1.00001	1.00003	0.581436	4442.41	Emilsson
VASN	rs8182173	Wald ratio	1	0.754	0.218182	0.0672727	0.00118177	1.24381	1.09016	1.41912	0.00448871	14.4196	Emilsson
ADAM12	rs10794057	Wald ratio	1	0.398	-0.100478	0.0311005	0.00123458	0.904405	0.850921	0.961249	0.0209316	68.3703	Emilsson
SYT11	rs145976521	Wald ratio	1	0.901	-0.070615	0.022779	0.00193521	0.931821	0.891133	0.974366	0.034381	113.865	Emilsson
BDNF	rs728635	Wald ratio	1	0.928	0.119792	0.0390625	0.0021646	1.12726	1.04418	1.21696	0.0197048	64.2828	Emilsson
PCSK7	rs6589598	Wald ratio	1	0.778	2.3e-05	7.57e-06	0.00238174	1.00002	1.00001	1.00004	0.373619	1907.52	Emilsson
C1QTNF5	rs2511847	Wald ratio	1	0.857	-0.0973154	0.0322148	0.0025208	0.90727	0.851755	0.966403	0.021766	71.1566	Emilsson
FABP4	rs1304403	Wald ratio	1	0.846	0.168831	0.0564935	0.00280345	1.18392	1.05983	1.32255	0.00617963	19.8853	Emilsson
B3GNT8	rs284663	Wald ratio	1	0.56	-0.0255376	0.00860215	0.00299014	0.974786	0.958488	0.99136	0.272783	1199.58	Emilsson
NID2	rs2749870	Wald ratio	1	0.446	-0.0278592	0.00938416	0.00299014	0.972525	0.954801	0.990578	0.229849	954.435	Emilsson
FGL1	rs7815429	Wald ratio	1	0.313	0.044843	0.0152466	0.00326968	1.04586	1.01507	1.07759	0.0855462	299.17	Emilsson
FCGR3B	rs2099684	Wald ratio	1	0.695	0.0490196	0.0166667	0.00326968	1.05024	1.01649	1.08512	0.0705724	242.827	Emilsson
DLK1	rs10144381	Wald ratio	1	0.373	0.0535714	0.0183673	0.00353794	1.05503	1.01773	1.09371	0.0718751	247.657	Emilsson
NEGR1	rs2220253	Wald ratio	1	0.545	0.121622	0.0425676	0.00427473	1.12933	1.03893	1.22759	0.0108633	35.1223	Emilsson
FAM177A1	rs799498	Wald ratio	1	0.852	0.0377644	0.0132931	0.00449851	1.03849	1.01178	1.0659	0.110522	397.366	Emilsson
CD33	rs1354106	Wald ratio	1	0.613	0.0208333	0.00734649	0.00457081	1.02105	1.00645	1.03586	0.394631	2084.73	Emilsson
IL15RA	rs7086174	Wald ratio	1	0.603	0.0635452	0.022408	0.00457081	1.06561	1.01982	1.11345	0.0428036	143.007	Emilsson
IL15RA	rs8177683	Wald ratio	1	0.604	0.0635452	0.022408	0.00457081	1.06561	1.01982	1.11345	0.0204976	66.9231	Emilsson
PCYOX1	rs2706762	Wald ratio	1	0.86	0.0329114	0.0116456	0.00471205	1.03346	1.01014	1.05732	0.150283	565.607	Emilsson
MMP12	rs17368582	Wald ratio	1	0.894	-0.0386266	0.0137339	0.0049158	0.96211	0.936557	0.98836	0.0926036	326.369	Emilsson
CTRB1	rs8051363	Wald ratio	1	0.743	-0.0381679	0.0137405	0.0054732	0.962551	0.936974	0.988826	0.104861	374.63	Emilsson
NT5C	rs117844704	Wald ratio	1	0.97	4.23e-05	1.54e-05	0.00595953	1.00004	1.00001	1.00007	0.098358	348.862	Emilsson
CBR3	rs60409141	Wald ratio	1	0.688	0.0268256	0.00983607	0.00638602	1.02719	1.00758	1.04718	0.193294	766.269	Emilsson
KDR	rs2305948	Wald ratio	1	0.931	2.09713	0.772627	0.00664189	8.14277	1.79101	37.0208	0.0263648	86.5979	Emilsson
HDGF	rs4399146	Wald ratio	1	0.717	0.0669145	0.0249071	0.00721904	1.0692	1.01826	1.1227	0.0293657	96.7527	Emilsson
NMB	rs12912342	Wald ratio	1	0.661	-0.109756	0.0408537	0.00721904	0.896053	0.8271	0.970753	0.0120537	39.0179	Emilsson
PRKCB	rs12919956	Wald ratio	1	0.806	-0.144828	0.0544828	0.00785528	0.865171	0.777545	0.962673	0.00657511	21.1664	Emilsson
LYZ	rs4761234	Wald ratio	1	0.521	0.0332681	0.0125245	0.0079015	1.03383	1.00876	1.05952	0.13033	479.258	Emilsson
OLFM2	rs56243392	Wald ratio	1	0.651	-0.0267459	0.010104	0.00811952	0.973609	0.954517	0.993082	0.20581	828.744	Emilsson
TNFAIP6	rs2278089	Wald ratio	1	0.556	0.029877	0.0114235	0.0089127	1.03033	1.00751	1.05366	0.15985	608.463	Emilsson
SHMT1	rs8067462	Wald ratio	1	0.607	-0.0566667	0.0216667	0.0089127	0.944909	0.905622	0.9859	0.0429392	143.48	Emilsson
GP6	rs1654425	Wald ratio	1	0.836	-0.0281174	0.0107579	0.00895843	0.972274	0.951988	0.992993	0.183479	718.618	Emilsson
DUT	rs117540572	Wald ratio	1	0.939	-0.138643	0.0530973	0.00902486	0.870539	0.784496	0.966019	0.0131651	42.6637	Emilsson
CDNF	rs72772427	Wald ratio	1	0.884	-0.116071	0.0446429	0.00932238	0.890412	0.815812	0.971833	0.0102905	33.2512	Emilsson
CTSZ	rs6070664	Wald ratio	1	0.973	-3.71e-05	1.43e-05	0.00964691	0.999963	0.999935	0.999991	0.0744047	257.074	Emilsson
WFIKKN2	rs12946082	Wald ratio	1	0.28	-0.0341556	0.0132827	0.010128	0.966421	0.941586	0.991911	0.11198	403.272	Emilsson
TPI1	rs2071058	Wald ratio	1	0.701	-0.12	0.0466667	0.010128	0.88692	0.809396	0.97187	0.00943196	30.4506	Emilsson
TXNDC15	rs78165052	Wald ratio	1	0.875	0.0781759	0.0306189	0.0106741	1.08131	1.01833	1.14819	0.020617	67.321	Emilsson
BMP6	rs12194931	Wald ratio	1	0.815	-0.148936	0.0588652	0.0114023	0.861624	0.767734	0.966997	0.00599512	19.288	Emilsson
IFNAR1	rs2257167	Wald ratio	1	0.873	0.0544218	0.021542	0.0115266	1.05593	1.01227	1.10147	0.0431246	144.128	Emilsson
SVEP1	rs78742138	Wald ratio	1	0.964	0.0721805	0.0285714	0.0115266	1.07485	1.01631	1.13676	0.030694	101.268	Emilsson
B3GALTL	rs9544399	Wald ratio	1	0.791	0.0683453	0.0273381	0.0124193	1.07073	1.01487	1.12967	0.025553	83.8615	Emilsson
TNFRSF10B	rs4871844	Wald ratio	1	0.658	-0.118881	0.0475524	0.0124193	0.887913	0.808897	0.974649	0.00920352	29.7063	Emilsson
LARGE	rs13054775	Wald ratio	1	0.463	-0.130081	0.0528455	0.0138343	0.878024	0.791632	0.973844	0.00752308	24.2412	Emilsson
RARRES1	rs73030851	Wald ratio	1	0.839	1.63e-05	6.68e-06	0.0145075	1.00002	1	1.00003	0.492363	3101.78	Emilsson
AMY2B	rs17014913	Wald ratio	1	0.839	0.0484988	0.0198614	0.0146118	1.04969	1.00962	1.09136	0.0506517	170.627	Emilsson
NRP1	rs2253918	Wald ratio	1	0.328	-0.0613027	0.0252874	0.0153404	0.940539	0.895059	0.988329	0.0300299	99.0089	Emilsson
NRP1	rs2247015	Wald ratio	1	0.395	-0.0613027	0.0252874	0.0153404	0.940539	0.895059	0.988329	0.0165352	53.7685	Emilsson
CNTN2	rs1572995	Wald ratio	1	0.9	0.0322129	0.0134454	0.0165826	1.03274	1.00588	1.06031	0.0917633	323.108	Emilsson
CYB5A	rs7239618	Wald ratio	1	0.681	-0.134921	0.0563492	0.0166491	0.873785	0.782419	0.975821	0.00689777	22.2123	Emilsson
METAP2	rs804327	Wald ratio	1	0.616	0.121212	0.0507576	0.0169376	1.12886	1.02197	1.24695	0.00824309	26.5805	Emilsson
PNLIPRP2	rs7910135	Wald ratio	1	0.493	0.0154799	0.00650155	0.0172679	1.0156	1.00274	1.02862	0.469388	2829.01	Emilsson
KDELC2	rs74911261	Wald ratio	1	0.982	3.11e-05	1.3e-05	0.0172679	1.00003	1.00001	1.00006	0.0916359	322.615	Emilsson
LCP1	rs11618432	Wald ratio	1	0.772	0.118421	0.05	0.0178642	1.12572	1.02063	1.24163	0.00813335	26.2237	Emilsson
APOA5	rs964184	Wald ratio	1	0.878	-0.0592992	0.0250674	0.0180013	0.942425	0.897241	0.989884	0.0294871	97.1649	Emilsson
APOC3	rs964184	Wald ratio	1	0.878	0.113402	0.0479381	0.0180013	1.12008	1.01963	1.23043	0.0294871	97.1649	Emilsson
FCN3	rs2474283	Wald ratio	1	0.933	-0.0363128	0.0153631	0.0180966	0.964339	0.935733	0.993818	0.0640933	219.007	Emilsson
IL6R	rs2228145	Wald ratio	1	0.583	-0.0154162	0.0065776	0.019091	0.984702	0.972089	0.997479	0.479439	2945.37	Emilsson
EPHB2	rs2043970	Wald ratio	1	0.906	-0.0640732	0.02746	0.0196307	0.937936	0.88879	0.989801	0.0325274	107.52	Emilsson
APOL1	rs2071732	Wald ratio	1	0.938	0.0800915	0.0343249	0.0196307	1.08339	1.0129	1.15878	0.022212	72.6476	Emilsson
ZG16B	rs2190809	Wald ratio	1	0.725	0.102564	0.0442308	0.0204037	1.10801	1.016	1.20835	0.00970398	31.3374	Emilsson
PVRL2	rs440277	Wald ratio	1	0.7	-0.130081	0.0560976	0.0204037	0.878024	0.786602	0.980071	0.00635418	20.4506	Emilsson
TNFRSF11A	rs6567282	Wald ratio	1	0.395	-0.0898204	0.0389222	0.0210163	0.914095	0.846955	0.986558	0.0133295	43.2038	Emilsson
FGF7	rs36023246	Wald ratio	1	0.61	-0.108696	0.0471014	0.0210163	0.897003	0.817901	0.983757	0.00906114	29.2425	Emilsson
PLXNB2	rs7292268	Wald ratio	1	0.737	0.557576	0.242424	0.0214482	1.74643	1.08592	2.80872	0.263852	1146.24	Emilsson
IL27RA	rs11667546	Wald ratio	1	0.804	0.0487805	0.0212195	0.0215134	1.04999	1.00722	1.09458	0.0529797	178.908	Emilsson
CD14	rs17208187	Wald ratio	1	0.693	0.0934066	0.0406593	0.0216018	1.09791	1.01381	1.18898	0.0140943	45.718	Emilsson
CLEC3B	rs10865936	Wald ratio	1	0.78	0.0708661	0.0311024	0.0226979	1.07344	1.00995	1.14091	0.0221419	72.4131	Emilsson
CPNE1	rs6060578	Wald ratio	1	0.9	-2.41e-05	1.06e-05	0.0230426	0.999976	0.999955	0.999997	0.194688	773.132	Emilsson
B3GALT6	rs3766186	Wald ratio	1	0.899	-0.0922509	0.0405904	0.0230426	0.911876	0.842141	0.987386	0.0133367	43.2274	Emilsson
CA13	rs13259464	Wald ratio	1	0.352	0.11811	0.0519685	0.0230426	1.12537	1.01638	1.24604	0.00735792	23.7051	Emilsson
PIP	rs4726600	Wald ratio	1	0.741	0.0744681	0.0329787	0.0239416	1.07731	1.00988	1.14925	0.0135664	43.9819	Emilsson
ASPN	rs7867909	Wald ratio	1	0.638	0.0460123	0.0205521	0.0251685	1.04709	1.00575	1.09013	0.0490902	165.095	Emilsson
CPXM1	rs13043754	Wald ratio	1	0.894	0.0296896	0.0134953	0.0278069	1.03013	1.00324	1.05775	0.104066	371.46	Emilsson
CFHR4	rs4915559	Wald ratio	1	0.753	-0.0244275	0.011145	0.0283953	0.975868	0.954782	0.99742	0.15959	607.284	Emilsson
FUT10	rs10094645	Wald ratio	1	0.594	0.0651163	0.0297674	0.028706	1.06728	1.0068	1.13141	0.0222956	72.9273	Emilsson
GNPNAT1	rs12589690	Wald ratio	1	0.596	-0.0864198	0.0395062	0.028706	0.917209	0.848868	0.991053	0.0126383	40.9345	Emilsson
CPZ	rs2688220	Wald ratio	1	0.52	-0.0992908	0.0453901	0.028706	0.905479	0.828403	0.989727	0.0099246	32.057	Emilsson
HSPA1L	rs115566560	Wald ratio	1	0.848	0.136364	0.0623377	0.028706	1.1461	1.01428	1.29505	0.0061138	19.6722	Emilsson
LTA4H	rs2247570	Wald ratio	1	0.708	0.120968	0.0556452	0.0297117	1.12859	1.01197	1.25864	0.00635755	20.4615	Emilsson
ASIP	rs62212171	Wald ratio	1	0.89	-0.0257985	0.0119165	0.0303916	0.974531	0.952034	0.997561	0.129736	476.748	Emilsson
WISP1	rs2013158	Wald ratio	1	0.738	-0.0219479	0.0101509	0.0306057	0.978291	0.95902	0.99795	0.205515	827.247	Emilsson
OXT	rs877172	Wald ratio	1	0.66	0.0239163	0.0110613	0.0306057	1.0242	1.00224	1.04665	0.200865	803.829	Emilsson
CFHR5	rs6685931	Wald ratio	1	0.561	-0.0532319	0.0247148	0.0312522	0.94816	0.903325	0.995221	0.0340697	112.798	Emilsson
FAM151A	rs10736390	Wald ratio	1	0.354	-0.0569106	0.0264228	0.0312522	0.944679	0.897	0.994891	0.0276781	91.0342	Emilsson
GLO1	rs12209477	Wald ratio	1	0.66	0.0833333	0.0386905	0.0312522	1.0869	1.00753	1.17253	0.0126669	41.0286	Emilsson
LAMC2	rs2276543	Wald ratio	1	0.737	0.0289017	0.0136802	0.0346285	1.02932	1.00209	1.0573	0.104421	372.874	Emilsson
ART3	rs4859610	Wald ratio	1	0.778	-0.0629921	0.0299213	0.0352684	0.938951	0.885469	0.995663	0.0222859	72.8948	Emilsson
ISLR2	rs923118	Wald ratio	1	0.758	0.0816327	0.0387755	0.0352684	1.08506	1.00565	1.17074	0.0140938	45.7161	Emilsson
TNXB	rs116298992	Wald ratio	1	0.964	-2.59e-05	1.23e-05	0.0357288	0.999974	0.99995	0.999998	0.182154	712.273	Emilsson
TIMP4	rs394945	Wald ratio	1	0.831	-0.0474934	0.0226913	0.0363471	0.953617	0.912134	0.996986	0.0403456	134.45	Emilsson
IL16	rs7166271	Wald ratio	1	0.909	-0.02875	0.01375	0.0365362	0.971659	0.945823	0.998202	0.10588	378.702	Emilsson
NPTX1	rs62067239	Wald ratio	1	0.874	-0.0727848	0.0348101	0.0365362	0.929801	0.868478	0.995453	0.0219931	71.9155	Emilsson
PLA2G12B	rs3829126	Wald ratio	1	0.903	0.132184	0.0632184	0.0365362	1.14132	1.00831	1.29187	0.00530381	17.052	Emilsson
SPARCL1	rs7681694	Wald ratio	1	0.371	0.0303688	0.0145336	0.036658	1.03083	1.00188	1.06062	0.0991874	352.128	Emilsson
PYY	rs8074783	Wald ratio	1	0.641	-0.089172	0.0426752	0.036658	0.914688	0.841293	0.994487	0.0113444	36.6957	Emilsson
RSPO3	rs3734626	Wald ratio	1	0.438	-0.04	0.0193846	0.0390659	0.960789	0.92497	0.997996	0.0520005	175.419	Emilsson
THYN1	rs486119	Wald ratio	1	0.693	-0.0972222	0.0472222	0.0395111	0.907354	0.827143	0.995344	0.00882321	28.4678	Emilsson
PEBP1	rs76597567	Wald ratio	1	0.982	-2.99e-05	1.47e-05	0.0419029	0.99997	0.999941	0.999999	0.137198	508.526	Emilsson
CAMP	rs2017858	Wald ratio	1	0.606	-0.12381	0.0609524	0.0422296	0.883548	0.784055	0.995667	0.00526475	16.9258	Emilsson
CREG1	rs7516079	Wald ratio	1	0.665	0.048951	0.0241259	0.0424598	1.05017	1.00167	1.10102	0.0364442	120.957	Emilsson
QDPR	rs28458311	Wald ratio	1	0.731	-0.0543478	0.0268116	0.0426596	0.947103	0.898617	0.998205	0.0299583	98.7656	Emilsson
UROS	rs2027515	Wald ratio	1	0.785	-0.0493827	0.0243827	0.0428349	0.951817	0.907399	0.998409	0.0354346	117.483	Emilsson
MLN	rs2395400	Wald ratio	1	0.734	0.0299401	0.0149701	0.0455003	1.03039	1.0006	1.06107	0.0980129	347.505	Emilsson
EGF	rs1860129	Wald ratio	1	0.377	0.0317073	0.0158537	0.0455003	1.03222	1.00063	1.06479	0.0789636	274.176	Emilsson
APOA1	rs75507001	Wald ratio	1	0.957	0.0545455	0.0272727	0.0455003	1.05606	1.00109	1.11405	0.0248964	81.6514	Emilsson
GP1BA	rs72835070	Wald ratio	1	0.921	0.0693642	0.0346821	0.0455003	1.07183	1.00139	1.14722	0.0174208	56.6996	Emilsson
B4GALT7	rs729460	Wald ratio	1	0.613	0.0935252	0.0467626	0.0455003	1.09804	1.00187	1.20343	0.00916708	29.5876	Emilsson
PLA2G7	rs71566584	Wald ratio	1	0.96	-0.116041	0.0580205	0.0455003	0.890439	0.794723	0.997682	0.0065932	21.225	Emilsson
PRRG4	rs61889468	Wald ratio	1	0.952	0.102128	0.0510638	0.0455003	1.10752	1.00204	1.22411	0.00504712	16.2226	Emilsson
TSG101	rs2305167	Wald ratio	1	0.847	-0.107383	0.0557047	0.0538911	0.898182	0.805281	1.0018	0.0057541	18.5081	Emilsson
IL9	rs756463	Wald ratio	1	0.766	0.0979021	0.051049	0.0551353	1.10285	0.997848	1.21891	0.00733072	23.6168	Emilsson
CCL17	rs16956811	Wald ratio	1	0.922	0.0439771	0.0229446	0.0552803	1.04496	0.999006	1.09302	0.0393422	130.969	Emilsson
NID1	rs72765466	Wald ratio	1	0.759	0.061674	0.0325991	0.0585054	1.06362	0.997782	1.13379	0.0188513	61.4447	Emilsson
CLEC11A	rs13866	Wald ratio	1	0.691	-0.0909091	0.0480519	0.0585054	0.913101	0.831029	1.00328	0.0101276	32.7195	Emilsson
NTN4	rs17288108	Wald ratio	1	0.844	0.0666667	0.0354167	0.0597881	1.06894	0.997254	1.14578	0.0151677	49.2533	Emilsson
AOC1	rs10452848	Wald ratio	1	0.498	-0.0156863	0.00836601	0.0607927	0.984436	0.968426	1.00071	0.292608	1322.83	Emilsson
VEGFA	rs864430	Wald ratio	1	0.549	-0.0524017	0.0279476	0.0607927	0.948948	0.898365	1.00238	0.0259687	85.262	Emilsson
OLA1	rs77345174	Wald ratio	1	0.81	0.0607287	0.0323887	0.0607927	1.06261	0.997251	1.13225	0.0187786	61.2032	Emilsson
CNTN4	rs2729284	Wald ratio	1	0.531	0.0764331	0.0407643	0.0607927	1.07943	0.996541	1.16921	0.0122771	39.7503	Emilsson
FAM107A	rs4681693	Wald ratio	1	0.503	-0.109091	0.0581818	0.0607927	0.896649	0.800013	1.00496	0.00604978	19.465	Emilsson
IL1RAP	rs724609	Wald ratio	1	0.865	-1.12e-05	5.99e-06	0.0617437	0.999989	0.999977	1	0.491039	3085.39	Emilsson
LTF	rs1126477	Wald ratio	1	0.781	0.0277228	0.0148515	0.0619482	1.02811	0.998615	1.05848	0.0872384	305.653	Emilsson
LEAP2	rs57880964	Wald ratio	1	0.838	-0.0533333	0.0286667	0.0628197	0.948064	0.896264	1.00286	0.0244361	80.104	Emilsson
LGALS3BP	rs4789847	Wald ratio	1	0.829	-0.0816327	0.0438776	0.0628197	0.92161	0.845664	1.00438	0.0108916	35.215	Emilsson
PF4V1	rs872914	Wald ratio	1	0.711	-0.0165816	0.00892857	0.0632908	0.983555	0.966493	1.00092	0.252598	1080.82	Emilsson
DECR1	rs10956431	Wald ratio	1	0.669	0.107438	0.0578512	0.0632908	1.11342	0.994067	1.24711	0.00648418	20.8717	Emilsson
CRLF1	rs2238647	Wald ratio	1	0.778	-0.0524476	0.0283217	0.0640471	0.948904	0.897665	1.00307	0.028255	92.9867	Emilsson
IGFBP4	rs495511	Wald ratio	1	0.77	-0.121951	0.0658537	0.0640471	0.885192	0.778003	1.00715	0.00535869	17.2294	Emilsson
SPINK5	rs2052536	Wald ratio	1	0.349	0.0789474	0.0427632	0.0648699	1.08215	0.995143	1.17676	0.0104984	33.9301	Emilsson
SERPINA4	rs10149354	Wald ratio	1	0.741	0.0268199	0.0145594	0.0654598	1.02718	0.998285	1.05692	0.10459	373.547	Emilsson
ADIPOQ	rs143257534	Wald ratio	1	0.974	0.0823529	0.0447059	0.0654598	1.08584	0.994743	1.18528	0.0091483	29.5264	Emilsson
GPC5	rs342702	Wald ratio	1	0.74	0.0156062	0.00852341	0.0671026	1.01573	0.998901	1.03284	0.267008	1164.94	Emilsson
SPON2	rs878323	Wald ratio	1	0.687	-0.0610329	0.0333333	0.0671026	0.940792	0.881292	1.00431	0.0195115	63.6394	Emilsson
VWC2	rs79259707	Wald ratio	1	0.868	-0.05	0.0273529	0.067556	0.951229	0.901575	1.00362	0.02649	87.0201	Emilsson
SCARF1	rs62089970	Wald ratio	1	0.976	-2.43e-05	1.33e-05	0.0682232	0.999976	0.99995	1	0.0767558	265.872	Emilsson
NPW	rs112050738	Wald ratio	1	0.833	0.0261324	0.0144599	0.0707266	1.02648	0.997793	1.05598	0.0916675	322.737	Emilsson
PTPRJ	rs12574500	Wald ratio	1	0.892	0.080402	0.0447236	0.0722162	1.08372	0.99277	1.18301	0.00763	24.5884	Emilsson
C11orf68	rs79653698	Wald ratio	1	0.984	0.105911	0.0591133	0.0731864	1.11172	0.990099	1.24829	0.00519036	16.6854	Emilsson
CLMP	rs7941947	Wald ratio	1	0.658	-0.045977	0.0256705	0.0732861	0.955064	0.9082	1.00435	0.0306594	101.15	Emilsson
IGF2R	rs629849	Wald ratio	1	0.854	0.0259542	0.0145038	0.0735386	1.02629	0.99753	1.05589	0.106985	383.127	Emilsson
PTGFRN	rs4233450	Wald ratio	1	0.822	0.0313808	0.0175732	0.0741455	1.03188	0.996942	1.06804	0.0668617	229.145	Emilsson
MMP10	rs17878931	Wald ratio	1	0.847	0.0336134	0.0189076	0.0754404	1.03418	0.996561	1.07323	0.0587244	199.517	Emilsson
KREMEN1	rs35755679	Wald ratio	1	0.965	0.1	0.0566667	0.0776132	1.10517	0.988994	1.23499	0.0060795	19.5612	Emilsson
RNASE6	rs2319516	Wald ratio	1	0.737	-0.0190058	0.0108187	0.0789593	0.981174	0.960587	1.0022	0.18137	708.527	Emilsson
SPINK6	rs10038416	Wald ratio	1	0.936	-1.47e-05	8.39e-06	0.0801183	0.999985	0.999969	1	0.244995	1037.74	Emilsson
B4GALT6	rs113222817	Wald ratio	1	0.965	-2.45e-05	1.4e-05	0.0801183	0.999976	0.999948	1	0.087788	307.764	Emilsson
ERAP2	rs38033	Wald ratio	1	0.543	9.82e-06	5.63e-06	0.0808054	1.00001	0.999999	1.00002	0.622561	5274.9	Emilsson
TNFRSF19	rs3814787	Wald ratio	1	0.714	-0.0722892	0.0415663	0.0820118	0.930262	0.857479	1.00922	0.0112541	36.4002	Emilsson
OAF	rs2845705	Wald ratio	1	0.811	-0.0239316	0.0138462	0.0839174	0.976352	0.950212	1.00321	0.104912	374.832	Emilsson
GHR	rs17574650	Wald ratio	1	0.885	0.0690909	0.04	0.0841187	1.07153	0.990734	1.15892	0.0153935	49.998	Emilsson
TGFBI	rs17689879	Wald ratio	1	0.568	-0.0282776	0.0164524	0.0856599	0.972118	0.941271	1.00398	0.0742611	256.538	Emilsson
PNLIPRP1	rs2915766	Wald ratio	1	0.467	-0.0753425	0.0438356	0.0856599	0.927426	0.851071	1.01063	0.0106116	34.2998	Emilsson
SPOCK3	rs62353586	Wald ratio	1	0.969	-2.49e-05	1.46e-05	0.0864763	0.999975	0.999947	1	0.124578	455.094	Emilsson
VPS24	rs72930400	Wald ratio	1	0.85	-0.0898204	0.0526946	0.0882792	0.914095	0.824398	1.01355	0.0071117	22.9061	Emilsson
COL6A1	rs2150458	Wald ratio	1	0.414	-0.0366667	0.0216667	0.0905873	0.963997	0.923917	1.00582	0.0436687	146.029	Emilsson
KLK8	rs10410942	Wald ratio	1	0.963	0.0405904	0.0239852	0.0905873	1.04143	0.9936	1.09155	0.0209342	68.3791	Emilsson
PPID	rs17843966	Wald ratio	1	0.743	0.0289157	0.0171084	0.091001	1.02934	0.995394	1.06444	0.0657731	225.151	Emilsson
YWHAB	rs2284265	Wald ratio	1	0.743	0.0681818	0.0403409	0.091001	1.07056	0.989173	1.15864	0.0118298	38.2846	Emilsson
SIRPA	rs6075340	Wald ratio	1	0.64	-8.37e-06	5.02e-06	0.0955807	0.999992	0.999982	1	0.802898	13027.1	Emilsson
COLEC11	rs3820897	Wald ratio	1	0.813	0.0163361	0.00980163	0.0955807	1.01647	0.997129	1.03619	0.223318	919.515	Emilsson
SEMA4D	rs45464494	Wald ratio	1	0.929	-1.56e-05	9.39e-06	0.0955807	0.999984	0.999966	1	0.216134	881.781	Emilsson
SEMA4C	rs112826173	Wald ratio	1	0.981	0.0490884	0.029453	0.0955807	1.05031	0.991398	1.11273	0.018951	61.7759	Emilsson
CNTN1	rs11177623	Wald ratio	1	0.672	0.0625	0.0375	0.0955807	1.06449	0.98906	1.14568	0.0136552	44.2739	Emilsson
HAPLN4	rs56212061	Wald ratio	1	0.852	-0.0898204	0.0538922	0.0955807	0.914095	0.822465	1.01593	0.00703338	22.6521	Emilsson
CBL	rs77751615	Wald ratio	1	0.967	0.0922509	0.0553506	0.0955807	1.09664	0.983895	1.2223	0.00468715	15.0601	Emilsson
RELT	rs7118982	Wald ratio	1	0.833	-0.0435967	0.0264305	0.0990484	0.95734	0.909009	1.00824	0.0374734	124.506	Emilsson
FCRL4	rs11591129	Wald ratio	1	0.825	-1.32e-05	8e-06	0.099546	0.999987	0.999971	1	0.32444	1535.85	Emilsson
ERLEC1	rs766075	Wald ratio	1	0.839	0.0848485	0.0515152	0.099546	1.08855	0.984008	1.2042	0.00735505	23.6957	Emilsson
PLAU	rs2227564	Wald ratio	1	0.74	0.0291262	0.0177184	0.10021	1.02955	0.994414	1.06594	0.0653175	223.483	Emilsson
NTF3	rs17784533	Wald ratio	1	0.904	0.0952381	0.0582011	0.101764	1.09992	0.98134	1.23283	0.00620002	19.9514	Emilsson
CRYZ	rs3819946	Wald ratio	1	0.861	1.28e-05	7.83e-06	0.10301	1.00001	0.999997	1.00003	0.333282	1598.63	Emilsson
CD177	rs73937410	Wald ratio	1	0.979	2.8e-05	1.73e-05	0.104163	1.00003	0.999994	1.00006	0.0794441	275.988	Emilsson
CTSB	rs1736089	Wald ratio	1	0.748	-0.0196078	0.0120915	0.104884	0.980583	0.957617	1.0041	0.1412	525.801	Emilsson
SWAP70	rs360155	Wald ratio	1	0.59	-0.037037	0.0228956	0.105739	0.96364	0.921353	1.00787	0.0426755	142.56	Emilsson
CD59	rs831636	Wald ratio	1	0.654	0.0582011	0.0359788	0.105739	1.05993	0.987758	1.13737	0.0161662	52.549	Emilsson
IL18RAP	rs4851589	Wald ratio	1	0.67	-0.080292	0.049635	0.105739	0.922847	0.837297	1.01714	0.00829965	26.7644	Emilsson
SPTLC2	rs151207248	Wald ratio	1	0.974	-0.0897833	0.0557276	0.107156	0.914129	0.819542	1.01963	0.00528406	16.9882	Emilsson
F7	rs488703	Wald ratio	1	0.89	-1.47e-05	9.21e-06	0.109599	0.999985	0.999967	1	0.23263	969.481	Emilsson
FCN2	rs12685659	Wald ratio	1	0.897	-1.51e-05	9.43e-06	0.109599	0.999985	0.999966	1	0.207621	837.948	Emilsson
S100A12	rs2916193	Wald ratio	1	0.745	0.0538117	0.0336323	0.109599	1.05529	0.987965	1.12719	0.0188945	61.5884	Emilsson
FMOD	rs4971253	Wald ratio	1	0.921	0.064	0.04	0.109599	1.06609	0.985703	1.15304	0.00909487	29.3524	Emilsson
CXCL9	rs4859571	Wald ratio	1	0.802	0.096	0.06	0.109599	1.10076	0.978632	1.23813	0.00496237	15.9488	Emilsson
PTHLH	rs41525752	Wald ratio	1	0.857	-0.0867052	0.0543353	0.110546	0.916947	0.824315	1.01999	0.00733566	23.6328	Emilsson
CPA4	rs729167	Wald ratio	1	0.749	-0.0110664	0.00694165	0.110891	0.988995	0.97563	1.00254	0.3715	1890.3	Emilsson
TMEM106A	rs74252763	Wald ratio	1	0.735	-0.0728477	0.0456954	0.110891	0.929742	0.850092	1.01686	0.00888213	28.6596	Emilsson
ARHGAP25	rs13426364	Wald ratio	1	0.715	0.092437	0.0579832	0.110891	1.09684	0.979013	1.22886	0.00577132	18.5638	Emilsson
LRRTM2	rs6862845	Wald ratio	1	0.714	-0.0964912	0.0605263	0.110891	0.908018	0.806442	1.02239	0.00530767	17.0645	Emilsson
CD109	rs6909201	Wald ratio	1	0.472	0.018797	0.0118421	0.112444	1.01897	0.995596	1.0429	0.141068	525.229	Emilsson
SPINT3	rs13042504	Wald ratio	1	0.483	-0.0347222	0.021875	0.112444	0.965874	0.925337	1.00819	0.0414241	138.199	Emilsson
QPCT	rs13027919	Wald ratio	1	0.538	-0.0369004	0.0232472	0.112444	0.963772	0.920844	1.0087	0.0365084	121.178	Emilsson
TAC1	rs10260339	Wald ratio	1	0.824	0.0866667	0.0546667	0.112883	1.09053	0.979728	1.21387	0.00652608	21.0075	Emilsson
RNASE1	rs12885981	Wald ratio	1	0.751	-0.040293	0.025641	0.116083	0.960508	0.913429	1.01001	0.0278737	91.696	Emilsson
MAN1C1	rs3767879	Wald ratio	1	0.465	-0.0581395	0.0372093	0.11817	0.943518	0.877157	1.0149	0.0147195	47.7763	Emilsson
RSPO4	rs6056847	Wald ratio	1	0.575	-0.0581395	0.0372093	0.11817	0.943518	0.877157	1.0149	0.0144592	46.9189	Emilsson
C1QTNF3	rs840390	Wald ratio	1	0.868	0.0738916	0.0472906	0.11817	1.07669	0.981378	1.18126	0.00944312	30.487	Emilsson
SERPINE1	rs4729660	Wald ratio	1	0.373	-0.0793651	0.0507937	0.11817	0.923703	0.836172	1.0204	0.00742587	23.9256	Emilsson
HBZ	rs2541638	Wald ratio	1	0.719	0.238636	0.153409	0.119814	1.26952	0.93984	1.71484	0.0125167	40.5358	Emilsson
FN1	rs1250259	Wald ratio	1	0.675	-0.0217822	0.0140594	0.121311	0.978453	0.951859	1.00579	0.111892	402.914	Emilsson
IGFBP7	rs1718860	Wald ratio	1	0.704	0.0383275	0.0247387	0.121311	1.03907	0.989891	1.0907	0.0343288	113.686	Emilsson
CBLN1	rs41214	Wald ratio	1	0.72	-0.0743243	0.047973	0.121311	0.928371	0.845057	1.0199	0.00883169	28.4954	Emilsson
PROK2	rs7644362	Wald ratio	1	0.798	1.3e-05	8.39e-06	0.121714	1.00001	0.999997	1.00003	0.322392	1521.54	Emilsson
AFM	rs1919480	Wald ratio	1	0.985	0.0439276	0.0284238	0.122236	1.04491	0.988286	1.10477	0.0177027	57.6335	Emilsson
LIFR	rs3099122	Wald ratio	1	0.595	0.0840336	0.0546218	0.123936	1.08767	0.977238	1.21057	0.00682489	21.976	Emilsson
EPHB6	rs7789303	Wald ratio	1	0.725	-0.0460251	0.0301255	0.126568	0.955018	0.90026	1.01311	0.022777	74.5386	Emilsson
CLEC4C	rs11055602	Wald ratio	1	0.567	-0.0104211	0.00684211	0.127739	0.989633	0.97645	1.00299	0.443147	2544.99	Emilsson
GALNT16	rs12100668	Wald ratio	1	0.408	-0.0515464	0.0340206	0.129734	0.94976	0.888495	1.01525	0.0181809	59.2192	Emilsson
CA1	rs2453868	Wald ratio	1	0.582	0.0666667	0.0442177	0.131633	1.06894	0.980199	1.16571	0.0105139	33.9807	Emilsson
IL10RB	rs2834167	Wald ratio	1	0.732	0.06875	0.045625	0.131849	1.07117	0.979537	1.17137	0.0100442	32.4473	Emilsson
CD7	rs116473040	Wald ratio	1	0.955	0.024948	0.016632	0.133614	1.02526	0.992378	1.05923	0.0795419	276.357	Emilsson
GNPTG	rs4984820	Wald ratio	1	0.923	-1.22093	0.813953	0.133614	0.294956	0.0598281	1.45415	0.0168205	54.7123	Emilsson
LRP12	rs72679151	Wald ratio	1	0.796	0.056872	0.0379147	0.133614	1.05852	0.98271	1.14018	0.014459	46.9183	Emilsson
UNC5D	rs6468316	Wald ratio	1	0.417	-0.0666667	0.0446809	0.135683	0.935507	0.857065	1.02113	0.00966658	31.2155	Emilsson
IGFBP6	rs10876402	Wald ratio	1	0.759	0.1	0.0672727	0.13715	1.10517	0.968647	1.26094	0.00442664	14.2193	Emilsson
TREML1	rs62396317	Wald ratio	1	0.878	0.0663507	0.0450237	0.140567	1.0686	0.978342	1.16719	0.00953782	30.7957	Emilsson
JAM3	rs655627	Wald ratio	1	0.566	-0.051087	0.0347826	0.141901	0.950196	0.887576	1.01723	0.016633	54.0922	Emilsson
FASN	rs11653003	Wald ratio	1	0.379	0.0783333	0.0533333	0.141901	1.08148	0.97414	1.20065	0.00677834	21.8251	Emilsson
LCT	rs4988235	Wald ratio	1	0.148	-0.0114226	0.00778816	0.142467	0.988642	0.973666	1.00385	0.233875	976.254	Emilsson
TFF1	rs3761376	Wald ratio	1	0.754	0.0291777	0.0198939	0.142467	1.02961	0.990234	1.07055	0.0527253	178.001	Emilsson
FCN1	rs11103604	Wald ratio	1	0.738	1.21535	0.831557	0.143868	3.37148	0.660671	17.205	0.0850616	297.317	Emilsson
FAIM	rs641320	Wald ratio	1	0.942	0.071161	0.0486891	0.143868	1.07375	0.976022	1.18127	0.00778989	25.1077	Emilsson
C3orf18	rs78431498	Wald ratio	1	0.985	-0.0894118	0.0611765	0.143868	0.914469	0.811138	1.03096	0.00533747	17.1608	Emilsson
IL7	rs72666886	Wald ratio	1	0.903	-0.0470588	0.0323529	0.145795	0.954031	0.895413	1.01649	0.020251	66.1014	Emilsson
ATP1B2	rs35119871	Wald ratio	1	0.629	0.0505051	0.0348485	0.147261	1.0518	0.982359	1.12615	0.0182972	59.6051	Emilsson
NAGK	rs2287327	Wald ratio	1	0.641	0.024557	0.016962	0.147684	1.02486	0.991349	1.05951	0.0718086	247.41	Emilsson
VWF	rs7308002	Wald ratio	1	0.588	0.0519337	0.0359116	0.148134	1.05331	0.981716	1.13012	0.0158731	51.5809	Emilsson
SEMA3G	rs1011063	Wald ratio	1	0.833	0.0481928	0.0333333	0.148238	1.04937	0.983006	1.12022	0.01725	56.1339	Emilsson
DEF6	rs3800401	Wald ratio	1	0.845	0.0839161	0.058042	0.148238	1.08754	0.970595	1.21857	0.00535662	17.2227	Emilsson
HAVCR1	rs6878069	Wald ratio	1	0.537	0.0230576	0.0160401	0.150576	1.02333	0.991654	1.05601	0.0791646	274.933	Emilsson
DYNLL2	rs35729384	Wald ratio	1	0.698	0.0614907	0.0428571	0.151349	1.06342	0.977742	1.15661	0.0109281	35.3342	Emilsson
LMAN2L	rs2271893	Wald ratio	1	0.67	0.0552486	0.038674	0.153127	1.0568	0.979657	1.14002	0.0144869	47.0102	Emilsson
FHIT	rs11922368	Wald ratio	1	0.704	-0.0632911	0.0443038	0.153127	0.93867	0.860599	1.02382	0.0104042	33.6224	Emilsson
PPIL1	rs10440825	Wald ratio	1	0.961	0.0453782	0.0319328	0.155301	1.04642	0.982937	1.11401	0.026537	87.1788	Emilsson
C5	rs1035029	Wald ratio	1	0.611	0.0521978	0.0368132	0.156217	1.05358	0.980242	1.13241	0.0157458	51.1605	Emilsson
MICB	rs3093664	Wald ratio	1	0.917	0.0230041	0.0162382	0.15658	1.02327	0.991216	1.05636	0.0831316	289.96	Emilsson
APOF	rs808919	Wald ratio	1	0.903	0.0529595	0.0373832	0.15658	1.05439	0.979893	1.13454	0.0180509	58.788	Emilsson
C1QC	rs78865058	Wald ratio	1	0.954	2.18e-05	1.54e-05	0.158019	1.00002	0.999992	1.00005	0.106199	379.979	Emilsson
CBR1	rs57716069	Wald ratio	1	0.977	-0.0385572	0.0273632	0.158808	0.962177	0.911933	1.01519	0.0290512	95.6856	Emilsson
SLPI	rs2743334	Wald ratio	1	0.717	0.0746269	0.0529851	0.158998	1.07748	0.971199	1.1954	0.00728694	23.4747	Emilsson
FUT2	rs114518757	Wald ratio	1	0.99	0.0700935	0.0498442	0.15965	1.07261	0.972776	1.18269	0.00816085	26.3131	Emilsson
RNASE4	rs1888560	Wald ratio	1	0.683	-0.0434978	0.0309417	0.159784	0.957435	0.901096	1.0173	0.0215338	70.3805	Emilsson
TMEM132D	rs61943549	Wald ratio	1	0.948	-0.0432099	0.0308642	0.161513	0.95771	0.901492	1.01743	0.023287	76.2475	Emilsson
CHST11	rs1650132	Wald ratio	1	0.515	0.0411215	0.0294393	0.162466	1.04198	0.983557	1.10387	0.0228774	74.8748	Emilsson
CPB1	rs13318853	Wald ratio	1	0.751	-0.0428016	0.0307393	0.1638	0.958102	0.902081	1.0176	0.0247022	80.9985	Emilsson
RARRES2	rs3735167	Wald ratio	1	0.742	-0.0253807	0.0182741	0.164867	0.974939	0.940637	1.01049	0.0594355	202.086	Emilsson
NQO1	rs11648249	Wald ratio	1	0.751	-0.037037	0.0266667	0.164867	0.96364	0.914568	1.01535	0.0272645	89.6356	Emilsson
UBASH3B	rs10502249	Wald ratio	1	0.712	-0.0534759	0.0385027	0.164867	0.947929	0.879026	1.02223	0.0143412	46.5305	Emilsson
FGFR3	rs2403274	Wald ratio	1	0.752	-0.0564972	0.040678	0.164867	0.945069	0.872645	1.0235	0.0116855	37.812	Emilsson
WISP2	rs1061098	Wald ratio	1	0.663	-0.043662	0.0314554	0.165119	0.957277	0.900041	1.01815	0.0202737	66.1769	Emilsson
HSPA1A	rs116739740	Wald ratio	1	0.934	0.0610169	0.0440678	0.16617	1.06292	0.974963	1.15881	0.0107291	34.6839	Emilsson
CD72	rs4879924	Wald ratio	1	0.883	-0.0734463	0.0531073	0.166671	0.929186	0.83733	1.03112	0.00647326	20.8364	Emilsson
DPT	rs1018454	Wald ratio	1	0.452	-0.030662	0.0222997	0.169131	0.969803	0.928329	1.01313	0.0408049	136.046	Emilsson
NPPB	rs549596	Wald ratio	1	0.576	-0.0539877	0.0392638	0.169131	0.947444	0.877266	1.02324	0.0129776	42.048	Emilsson
CLEC12A	rs7970682	Wald ratio	1	0.62	8.43e-06	6.16e-06	0.170927	1.00001	0.999996	1.00002	0.52944	3598.16	Emilsson
TNC	rs72758637	Wald ratio	1	0.823	-0.0148148	0.0108642	0.172682	0.985294	0.964535	1.0065	0.191149	755.759	Emilsson
GSTO1	rs1147611	Wald ratio	1	0.64	0.0149254	0.0109453	0.172682	1.01504	0.993494	1.03705	0.167551	643.677	Emilsson
THBS4	rs35351529	Wald ratio	1	0.923	-0.0503356	0.0369128	0.172682	0.95091	0.884543	1.02226	0.0126228	40.8837	Emilsson
ENPP5	rs62400860	Wald ratio	1	0.96	1.17e-05	8.6e-06	0.174736	1.00001	0.999995	1.00003	0.20405	819.84	Emilsson
SECTM1	rs79181084	Wald ratio	1	0.955	0.036566	0.027027	0.176074	1.03724	0.983727	1.09367	0.0340053	112.577	Emilsson
MTHFS	rs35144922	Wald ratio	1	0.693	0.0298137	0.0220497	0.176339	1.03026	0.986686	1.07576	0.0441177	147.6	Emilsson
CCL21	rs11515363	Wald ratio	1	0.745	-0.0530387	0.0392265	0.176339	0.948343	0.878163	1.02413	0.0124475	40.309	Emilsson
F5	rs137902590	Wald ratio	1	0.986	0.0589431	0.0436992	0.177389	1.06071	0.973646	1.15557	0.0267316	87.8357	Emilsson
GUCA2B	rs11210601	Wald ratio	1	0.855	-0.0827586	0.0613793	0.177557	0.920573	0.816228	1.03826	0.00521315	16.759	Emilsson
CBX5	rs4759076	Wald ratio	1	0.526	-0.0796296	0.0592593	0.179029	0.923458	0.822195	1.03719	0.00581623	18.7091	Emilsson
ADAM19	rs7728609	Wald ratio	1	0.675	0.0365854	0.0272358	0.17918	1.03726	0.983344	1.09414	0.0265514	87.2274	Emilsson
C4BPA	rs11120218	Wald ratio	1	0.889	0.030303	0.0226107	0.180178	1.03077	0.986084	1.07747	0.036322	120.536	Emilsson
GAPDH	rs10849478	Wald ratio	1	0.465	-0.062406	0.0466165	0.180665	0.939501	0.857465	1.02939	0.00880116	28.396	Emilsson
KLK7	rs1722558	Wald ratio	1	0.623	-0.0372549	0.0278431	0.180887	0.963431	0.912263	1.01747	0.030545	100.761	Emilsson
GLCE	rs3865014	Wald ratio	1	0.761	0.0116959	0.00877193	0.182422	1.01176	0.994518	1.02931	0.265916	1158.45	Emilsson
DNAJB11	rs73887965	Wald ratio	1	0.928	-0.0224404	0.0168303	0.182422	0.97781	0.94608	1.0106	0.0679344	233.089	Emilsson
CD48	rs114547897	Wald ratio	1	0.986	-0.0435256	0.0326442	0.182422	0.957408	0.898069	1.02067	0.0233166	76.3468	Emilsson
CNTN5	rs2614546	Wald ratio	1	0.928	0.0535117	0.0401338	0.182422	1.05497	0.975163	1.14131	0.0119468	38.6679	Emilsson
TNFRSF17	rs256400	Wald ratio	1	0.654	-0.0700787	0.0527559	0.18406	0.93232	0.840734	1.03388	0.00729947	23.5154	Emilsson
ASPH	rs2350578	Wald ratio	1	0.374	-0.0391892	0.0297297	0.187443	0.961569	0.907139	1.01926	0.0230771	75.544	Emilsson
HBEGF	rs1142828	Wald ratio	1	0.595	0.0873684	0.0663158	0.187684	1.0913	0.958285	1.24278	0.0043496	13.9708	Emilsson
DKK2	rs77571736	Wald ratio	1	0.954	-0.0222222	0.0169312	0.189351	0.978023	0.9461	1.01102	0.078379	271.973	Emilsson
LSAMP	rs17646258	Wald ratio	1	0.829	0.0495495	0.0378378	0.190357	1.0508	0.975688	1.13169	0.0139729	45.3186	Emilsson
EBI3	rs10409421	Wald ratio	1	0.716	-8.67e-06	6.67e-06	0.193601	0.999991	0.999978	1	0.448374	2599.4	Emilsson
CSGALNACT2	rs2435378	Wald ratio	1	0.667	0.0221411	0.0170316	0.193601	1.02239	0.988822	1.05709	0.0750384	259.441	Emilsson
PDGFRL	rs2517158	Wald ratio	1	0.89	-0.0760234	0.0584795	0.193601	0.926795	0.826427	1.03935	0.00572539	18.4152	Emilsson
MST1	rs9852529	Wald ratio	1	0.688	6.74e-06	5.24e-06	0.198543	1.00001	0.999996	1.00002	0.770873	10759.3	Emilsson
APLP2	rs79537552	Wald ratio	1	0.936	0.0300501	0.0233723	0.198543	1.03051	0.984364	1.07881	0.0429872	143.648	Emilsson
PGF	rs175484	Wald ratio	1	0.571	-0.0650794	0.0507937	0.200106	0.936993	0.848203	1.03508	0.00777794	25.0688	Emilsson
BIN1	rs11694743	Wald ratio	1	0.623	-0.0614815	0.0481481	0.201629	0.94037	0.855686	1.03344	0.00856105	27.6146	Emilsson
CCL16	rs10445391	Wald ratio	1	0.937	1e-05	7.86e-06	0.203115	1.00001	0.999995	1.00003	0.231402	962.82	Emilsson
MESDC2	rs1012541	Wald ratio	1	0.966	0.0607029	0.0479233	0.205275	1.06258	0.967319	1.16723	0.00643539	20.7137	Emilsson
PPIF	rs57559820	Wald ratio	1	0.813	-0.0657895	0.0519737	0.205577	0.936328	0.845643	1.03674	0.00702505	22.625	Emilsson
LGALS4	rs55945853	Wald ratio	1	0.51	-0.0447514	0.0353591	0.205647	0.956235	0.892209	1.02486	0.0163739	53.2356	Emilsson
TMEM25	rs629470	Wald ratio	1	0.823	0.0833333	0.0659091	0.206098	1.0869	0.955187	1.23678	0.00507634	16.317	Emilsson
C2	rs114508013	Wald ratio	1	0.964	-2.04e-05	1.62e-05	0.206532	0.99998	0.999948	1.00001	0.0966437	342.131	Emilsson
ST6GALNAC5	rs17099799	Wald ratio	1	0.974	-0.0628272	0.0497382	0.206532	0.939106	0.851876	1.03527	0.00739076	23.8116	Emilsson
SPINK2	rs9993023	Wald ratio	1	0.971	0.0367554	0.0291508	0.207356	1.03744	0.979826	1.09844	0.0350591	116.193	Emilsson
GDI2	rs2890364	Wald ratio	1	0.774	0.0424658	0.03379	0.208842	1.04338	0.976518	1.11482	0.0167791	54.5752	Emilsson
SEMA3E	rs60909458	Wald ratio	1	0.843	-1.03e-05	8.21e-06	0.2113	0.99999	0.999974	1.00001	0.362351	1817.29	Emilsson
NCR3	rs769178	Wald ratio	1	0.941	0.0255537	0.0204429	0.2113	1.02588	0.98559	1.06782	0.0382603	127.224	Emilsson
PNP	rs1760928	Wald ratio	1	0.776	-0.030581	0.0244648	0.2113	0.969882	0.924472	1.01752	0.0371737	123.471	Emilsson
DPY30	rs7596656	Wald ratio	1	0.851	0.0808824	0.0647059	0.2113	1.08424	0.955098	1.23085	0.00469055	15.0711	Emilsson
EFNB3	rs8066124	Wald ratio	1	0.763	-0.0760684	0.0615385	0.216417	0.926753	0.82145	1.04555	0.00495079	15.9114	Emilsson
FH	rs12071124	Wald ratio	1	0.701	-0.0789474	0.0640351	0.217622	0.924089	0.81509	1.04766	0.0054479	17.5178	Emilsson
PDCD1LG2	rs16923189	Wald ratio	1	0.702	-0.0187773	0.0152838	0.219233	0.981398	0.952435	1.01124	0.0877636	307.67	Emilsson
HRSP12	rs57392722	Wald ratio	1	0.654	0.051875	0.0425	0.222242	1.05324	0.969064	1.14474	0.0115857	37.4855	Emilsson
GFRA2	rs15881	Wald ratio	1	0.514	-0.0250804	0.0205788	0.222939	0.975232	0.936679	1.01537	0.0483226	162.382	Emilsson
PROC	rs2069901	Wald ratio	1	0.58	0.0453488	0.0372093	0.222939	1.04639	0.972795	1.12556	0.0144133	46.7679	Emilsson
FUT8	rs4902389	Wald ratio	1	0.837	5.24e-06	4.31e-06	0.224219	1.00001	0.999997	1.00001	0.622153	5265.74	Emilsson
CD5L	rs2765496	Wald ratio	1	0.549	0.0446328	0.0367232	0.224219	1.04564	0.973026	1.12368	0.0155141	50.3958	Emilsson
CST3	rs71334202	Wald ratio	1	0.788	-0.0315789	0.0259868	0.224294	0.968914	0.920799	1.01954	0.0308773	101.892	Emilsson
CHST15	rs10794181	Wald ratio	1	0.6	-0.0672269	0.0554622	0.225466	0.934983	0.838674	1.04235	0.00679728	21.8865	Emilsson
SERPINA12	rs4900236	Wald ratio	1	0.758	0.0252055	0.0208219	0.226077	1.02553	0.984516	1.06824	0.0488765	164.339	Emilsson
CST6	rs56579340	Wald ratio	1	0.979	0.0365079	0.0301587	0.226077	1.03718	0.97765	1.10034	0.0163197	53.0564	Emilsson
PSAP	rs7086891	Wald ratio	1	0.709	0.0140549	0.0116317	0.226919	1.01415	0.991295	1.03754	0.158107	600.582	Emilsson
KNG1	rs5030044	Wald ratio	1	0.878	-7.77e-06	6.48e-06	0.230139	0.999992	0.99998	1	0.508073	3302.96	Emilsson
GOLM1	rs7854118	Wald ratio	1	0.903	-0.0446097	0.0371747	0.230139	0.956371	0.889165	1.02866	0.0126763	41.0594	Emilsson
ICAM4	rs5030398	Wald ratio	1	0.925	-0.079646	0.0663717	0.230139	0.923443	0.810799	1.05174	0.00708679	22.8253	Emilsson
FGG	rs12511469	Wald ratio	1	0.778	0.0744186	0.0620155	0.230139	1.07726	0.953962	1.21649	0.00574833	18.4895	Emilsson
IL18R1	rs1861246	Wald ratio	1	0.814	-0.0124317	0.0103825	0.231163	0.987645	0.96775	1.00795	0.162252	619.376	Emilsson
CA11	rs2617805	Wald ratio	1	0.846	0.0628571	0.0525714	0.231832	1.06487	0.960614	1.18045	0.00797989	25.725	Emilsson
COPS7B	rs13398149	Wald ratio	1	0.871	0.0748299	0.062585	0.231832	1.0777	0.953289	1.21835	0.00485593	15.605	Emilsson
PCBD1	rs72818110	Wald ratio	1	0.951	0.0508021	0.0427807	0.23503	1.05211	0.967492	1.14414	0.0130362	42.2403	Emilsson
FBP1	rs28382867	Wald ratio	1	0.975	0.0558824	0.0470588	0.23503	1.05747	0.9643	1.15965	0.0056355	18.1245	Emilsson
ENG	rs4837181	Wald ratio	1	0.982	0.0486891	0.0411985	0.237278	1.04989	0.968449	1.13819	0.0100808	32.5668	Emilsson
B4GALT1	rs60988380	Wald ratio	1	0.905	-0.0601852	0.0509259	0.237278	0.94159	0.852144	1.04043	0.0080225	25.8634	Emilsson
SHMT2	rs7485577	Wald ratio	1	0.678	2.5	2.12963	0.24043	12.1825	0.187482	791.614	0.00509288	16.3704	Emilsson
SLAMF6	rs1748512	Wald ratio	1	0.788	-0.0598639	0.0510204	0.240662	0.941893	0.85226	1.04095	0.00721983	23.2569	Emilsson
WARS	rs941923	Wald ratio	1	0.766	-0.0329412	0.0282353	0.243345	0.967595	0.915502	1.02265	0.0233107	76.3268	Emilsson
APOM	rs115878542	Wald ratio	1	0.961	-0.0719178	0.0616438	0.243345	0.930607	0.824697	1.05012	0.00639122	20.5706	Emilsson
GCA	rs34777723	Wald ratio	1	0.861	0.06125	0.0525	0.243345	1.06316	0.959205	1.17839	0.00612756	19.7168	Emilsson
CAT	rs7933285	Wald ratio	1	0.8	-0.0296167	0.0254355	0.244269	0.970818	0.923605	1.02044	0.0263581	86.5751	Emilsson
CPB2	rs4942471	Wald ratio	1	0.656	0.0135417	0.0116319	0.244351	1.01363	0.990786	1.03701	0.14974	563.202	Emilsson
IGFBP5	rs139739387	Wald ratio	1	0.984	0.0592105	0.0509868	0.245524	1.061	0.960094	1.17251	0.01164	37.6631	Emilsson
AZU1	rs351976	Wald ratio	1	0.709	-0.037037	0.0319444	0.246285	0.96364	0.905156	1.0259	0.019252	62.7766	Emilsson
ADM	rs2923098	Wald ratio	1	0.535	0.0685185	0.0592593	0.247579	1.07092	0.953487	1.20282	0.00580342	18.6677	Emilsson
ACP5	rs10424332	Wald ratio	1	0.713	0.0362832	0.0314159	0.248119	1.03695	0.975025	1.10281	0.0209035	68.2765	Emilsson
CCL15	rs1734958	Wald ratio	1	0.963	1.01e-05	8.74e-06	0.248563	1.00001	0.999993	1.00003	0.158209	601.042	Emilsson
ACP6	rs2153463	Wald ratio	1	0.739	-0.00836864	0.00730932	0.252239	0.991666	0.977561	1.00598	0.343763	1675.24	Emilsson
ADAMTS5	rs2830585	Wald ratio	1	0.873	-9.29e-06	8.18e-06	0.255804	0.999991	0.999975	1.00001	0.25864	1115.69	Emilsson
RAB6B	rs9813363	Wald ratio	1	0.825	0.0359712	0.0316547	0.255804	1.03663	0.974265	1.10298	0.0223158	72.9947	Emilsson
PGD	rs41289075	Wald ratio	1	0.981	0.0677507	0.0596206	0.255804	1.0701	0.95208	1.20275	0.00507581	16.3153	Emilsson
ANXA2	rs61381915	Wald ratio	1	0.892	-0.045082	0.0397541	0.256786	0.955919	0.884264	1.03338	0.0114709	37.1097	Emilsson
S100A7	rs3014860	Wald ratio	1	0.948	-1.41e-05	1.24e-05	0.257074	0.999986	0.999962	1.00001	0.144349	539.503	Emilsson
SNX17	rs112001928	Wald ratio	1	0.987	-0.0599078	0.0529954	0.258293	0.941851	0.84893	1.04494	0.00483359	15.5329	Emilsson
F13B	rs12116643	Wald ratio	1	0.863	-0.0179159	0.0159049	0.259981	0.982244	0.952096	1.01335	0.0707516	243.491	Emilsson
CCL7	rs8068122	Wald ratio	1	0.828	-6.88e-06	6.12e-06	0.260589	0.999993	0.999981	1.00001	0.314027	1463.99	Emilsson
LRIG3	rs76158750	Wald ratio	1	0.907	0.0166292	0.0148315	0.262198	1.01677	0.987637	1.04676	0.0334072	110.529	Emilsson
SMPDL3A	rs13192569	Wald ratio	1	0.825	0.0122399	0.0110159	0.266521	1.01232	0.990692	1.03441	0.192737	763.536	Emilsson
NOTCH3	rs4808238	Wald ratio	1	0.866	-0.0699301	0.0629371	0.266521	0.932459	0.824246	1.05488	0.00474597	15.25	Emilsson
CFI	rs10033900	Wald ratio	1	0.522	-0.0240678	0.0216949	0.267268	0.97622	0.935579	1.01863	0.0434283	145.189	Emilsson
ITIH5	rs12572683	Wald ratio	1	0.774	-0.0405941	0.0366337	0.267815	0.960219	0.89369	1.0317	0.0142752	46.3132	Emilsson
CA6	rs3765963	Wald ratio	1	0.444	-0.0142023	0.0128405	0.2687	0.985898	0.961395	1.01103	0.130441	479.726	Emilsson
SERPINA9	rs76524332	Wald ratio	1	0.896	-0.0604396	0.0549451	0.271332	0.941351	0.845242	1.04839	0.00617325	19.8647	Emilsson
C10orf54	rs10999992	Wald ratio	1	0.853	0.0390625	0.0355469	0.271811	1.03984	0.969854	1.11487	0.0164352	53.4382	Emilsson
CTSH	rs7177831	Wald ratio	1	0.819	-0.0100988	0.00922064	0.273412	0.989952	0.972222	1.00801	0.246053	1043.68	Emilsson
SPINK1	rs4705205	Wald ratio	1	0.573	0.0330189	0.0301887	0.274065	1.03357	0.974188	1.09657	0.021993	71.9152	Emilsson
TINAGL1	rs2275436	Wald ratio	1	0.494	-0.0619469	0.0566372	0.274065	0.939933	0.841175	1.05029	0.00638358	20.5458	Emilsson
CYTL1	rs62291616	Wald ratio	1	0.814	-0.0271186	0.0248588	0.275313	0.973246	0.926963	1.02184	0.0379467	126.14	Emilsson
ADH7	rs17529509	Wald ratio	1	0.927	0.0299252	0.0274314	0.275313	1.03038	0.976442	1.08729	0.0217631	71.1469	Emilsson
LGMN	rs7140705	Wald ratio	1	0.913	-0.0447761	0.0410448	0.275313	0.956212	0.882299	1.03632	0.0114101	36.9107	Emilsson
COMP	rs12983566	Wald ratio	1	0.89	0.075	0.06875	0.275313	1.07788	0.942	1.23337	0.00501248	16.1107	Emilsson
TCN1	rs150355695	Wald ratio	1	0.658	0.025784	0.0236934	0.276491	1.02612	0.979557	1.0749	0.037072	123.121	Emilsson
FUT5	rs10420107	Wald ratio	1	0.766	0.0134892	0.0124101	0.277056	1.01358	0.989224	1.03854	0.110822	398.578	Emilsson
PSG5	rs62113694	Wald ratio	1	0.927	-0.0236794	0.0218579	0.27866	0.976599	0.935643	1.01935	0.0407922	136.001	Emilsson
NAPA	rs2914001	Wald ratio	1	0.833	0.0575949	0.0531646	0.27866	1.05929	0.954462	1.17562	0.00694553	22.3672	Emilsson
FLRT2	rs6574818	Wald ratio	1	0.729	0.0367442	0.0339535	0.279167	1.03743	0.970635	1.10882	0.0182643	59.496	Emilsson
CAPN2	rs12038299	Wald ratio	1	0.71	0.0572464	0.0528986	0.279167	1.05892	0.954627	1.1746	0.00784232	25.278	Emilsson
TPSAB1	rs61739908	Wald ratio	1	0.808	-0.0173675	0.0160878	0.280345	0.982782	0.952277	1.01427	0.0928362	327.273	Emilsson
SLITRK5	rs7333224	Wald ratio	1	0.756	-0.0732143	0.0678571	0.280611	0.929402	0.813659	1.06161	0.00462783	14.8686	Emilsson
AHSG	rs13098866	Wald ratio	1	0.533	-0.00753275	0.0069869	0.280978	0.992496	0.978997	1.00618	0.417701	2294.02	Emilsson
PLOD3	rs10215699	Wald ratio	1	0.938	0.0614035	0.0570175	0.281515	1.06333	0.950896	1.18905	0.00604636	19.4539	Emilsson
ADGRF5	rs611779	Wald ratio	1	0.966	-1.17e-05	1.09e-05	0.283977	0.999988	0.999967	1.00001	0.107623	385.688	Emilsson
DCBLD2	rs9859042	Wald ratio	1	0.936	0.0356295	0.0332542	0.283977	1.03627	0.970884	1.10606	0.0212349	69.3825	Emilsson
GJD2	rs518930	Wald ratio	1	0.454	0.067	0.063	0.287559	1.0693	0.945085	1.20983	0.00495768	15.9337	Emilsson
EPO	rs576236	Wald ratio	1	0.578	-0.0584746	0.0550847	0.288445	0.943202	0.846673	1.05074	0.00679257	21.8712	Emilsson
RTN4R	rs701447	Wald ratio	1	0.593	1.5261	1.44578	0.291171	4.60022	0.27046	78.2446	0.029928	98.6625	Emilsson
PCSK9	rs191448950	Wald ratio	1	0.989	-3.65e-05	3.46e-05	0.291858	0.999964	0.999896	1.00003	0.0249107	81.6997	Emilsson
CRTAC1	rs588061	Wald ratio	1	0.529	-0.0193642	0.0184971	0.295157	0.980822	0.9459	1.01703	0.0596566	202.885	Emilsson
DNER	rs35032874	Wald ratio	1	0.741	0.045679	0.0438272	0.297294	1.04674	0.960576	1.14063	0.0100734	32.5427	Emilsson
MAPK9	rs2303009	Wald ratio	1	0.855	0.0598802	0.057485	0.297566	1.06171	0.948579	1.18833	0.00691508	22.2684	Emilsson
PI3	rs6104052	Wald ratio	1	0.759	0.0270358	0.0260586	0.299503	1.0274	0.976248	1.08124	0.0344799	114.204	Emilsson
PRCP	rs10898041	Wald ratio	1	0.838	0.0457286	0.0442211	0.301094	1.04679	0.959882	1.14157	0.0107521	34.7591	Emilsson
CA10	rs2202237	Wald ratio	1	0.522	-0.0423077	0.0410256	0.302424	0.958575	0.884513	1.03884	0.0121444	39.3154	Emilsson
SLAMF7	rs11581248	Wald ratio	1	0.895	-8.53e-06	8.36e-06	0.307535	0.999991	0.999975	1.00001	0.257285	1107.82	Emilsson
PENK	rs2670014	Wald ratio	1	0.544	-0.01513	0.0148936	0.30969	0.984984	0.956646	1.01416	0.0887717	311.549	Emilsson
CXCL5	rs450373	Wald ratio	1	0.85	-0.0130607	0.0129288	0.312398	0.987024	0.962327	1.01236	0.146514	548.985	Emilsson
HDHD2	rs76922914	Wald ratio	1	0.937	0.0141767	0.0141767	0.317311	1.01428	0.986483	1.04286	0.099277	352.481	Emilsson
GDF15	rs45543339	Wald ratio	1	0.763	-0.266667	0.266667	0.317311	0.765928	0.454147	1.29175	0.0732366	252.719	Emilsson
THBS2	rs73041845	Wald ratio	1	0.865	0.0203327	0.0203327	0.317311	1.02054	0.98067	1.06203	0.0683556	234.64	Emilsson
ECM1	rs1694369	Wald ratio	1	0.659	0.0177596	0.0177596	0.317311	1.01792	0.983095	1.05397	0.0602049	204.869	Emilsson
EMILIN3	rs61739314	Wald ratio	1	0.962	-0.019883	0.019883	0.317311	0.980313	0.942845	1.01927	0.0534467	180.574	Emilsson
CCL22	rs62037146	Wald ratio	1	0.984	5.54e-06	5.54e-06	0.317311	1.00001	0.999995	1.00002	0.0431039	144.056	Emilsson
MANSC1	rs61922044	Wald ratio	1	0.905	0.0277778	0.0277778	0.317311	1.02817	0.973686	1.0857	0.0222847	72.8909	Emilsson
MFAP2	rs2235932	Wald ratio	1	0.354	-0.0363128	0.0363128	0.317311	0.964339	0.898089	1.03548	0.0146545	47.5622	Emilsson
B4GALT2	rs1859728	Wald ratio	1	0.966	-0.0378788	0.0378788	0.317311	0.96283	0.893936	1.03703	0.0103009	33.2852	Emilsson
ESD	rs1216987	Wald ratio	1	0.913	-0.0480349	0.0480349	0.317311	0.9531	0.867462	1.04719	0.00833088	26.866	Emilsson
GALNT10	rs115757082	Wald ratio	1	0.988	0.0422535	0.0422535	0.317311	1.04316	0.960248	1.13323	0.00585708	18.8413	Emilsson
CDC25B	rs73084583	Wald ratio	1	0.947	-0.508475	0.508475	0.317311	0.601412	0.221998	1.62928	0.00559088	17.9801	Emilsson
TRIL	rs11761932	Wald ratio	1	0.954	-0.0674603	0.0674603	0.317311	0.934765	0.818991	1.0669	0.00557362	17.9243	Emilsson
FLRT1	rs138056821	Wald ratio	1	0.981	0.0961538	0.0961538	0.317311	1.10093	0.911825	1.32925	0.00493919	15.8739	Emilsson
THBS3	rs2306125	Wald ratio	1	0.82	-0.0694215	0.0694215	0.317311	0.932933	0.81425	1.06892	0.00432202	13.8818	Emilsson
SELL	rs4987358	Wald ratio	1	0.698	0.0183246	0.0185864	0.324175	1.01849	0.982058	1.05628	0.0615204	209.639	Emilsson
TMEM2	rs1410986	Wald ratio	1	0.705	-0.050365	0.0510949	0.324273	0.950882	0.860268	1.05104	0.00780697	25.1631	Emilsson
PDGFD	rs10895596	Wald ratio	1	0.7	0.0108974	0.0110577	0.324375	1.01096	0.989282	1.03311	0.163538	625.246	Emilsson
PDIA6	rs6752558	Wald ratio	1	0.693	0.0563025	0.0571429	0.32448	1.05792	0.945825	1.18329	0.00602553	19.3865	Emilsson
POMGNT2	rs729654	Wald ratio	1	0.534	-0.0222628	0.0226277	0.325179	0.977983	0.935557	1.02233	0.0373644	124.129	Emilsson
TAX1BP3	rs3826503	Wald ratio	1	0.847	-0.0589041	0.060274	0.328434	0.942797	0.837745	1.06102	0.00552472	17.7662	Emilsson
SERPINA10	rs941591	Wald ratio	1	0.805	0.00914097	0.00936123	0.328831	1.00918	0.990835	1.02787	0.25884	1116.86	Emilsson
SERPING1	rs11229080	Wald ratio	1	0.742	-6.89e-06	7.09e-06	0.331135	0.999993	0.999979	1.00001	0.382872	1984.07	Emilsson
NRP2	rs16837641	Wald ratio	1	0.724	-0.0492647	0.0507353	0.331541	0.951929	0.861823	1.05146	0.00739189	23.8153	Emilsson
CHST9	rs7233634	Wald ratio	1	0.667	0.0235714	0.0242857	0.331753	1.02385	0.976258	1.07377	0.034827	115.396	Emilsson
PLXNA1	rs891762	Wald ratio	1	0.318	-0.0362637	0.0373626	0.331753	0.964386	0.896287	1.03766	0.0143676	46.6174	Emilsson
MRC1	rs12243310	Wald ratio	1	0.866	0.0534483	0.0551724	0.33267	1.0549	0.946779	1.17537	0.0070267	22.6304	Emilsson
CHAD	rs198558	Wald ratio	1	0.853	0.0548387	0.0567742	0.33409	1.05637	0.945124	1.18071	0.00602504	19.3849	Emilsson
SFRP4	rs75474297	Wald ratio	1	0.855	0.0317881	0.0331126	0.337055	1.0323	0.96743	1.10152	0.022614	73.993	Emilsson
CCL18	rs712042	Wald ratio	1	0.887	-0.0103604	0.0108108	0.337895	0.989693	0.968943	1.01089	0.158073	600.43	Emilsson
IGSF3	rs614477	Wald ratio	1	0.398	-0.0538462	0.0564103	0.339808	0.947578	0.848394	1.05836	0.00655966	21.1163	Emilsson
OSCAR	rs4442925	Wald ratio	1	0.455	-0.0449275	0.0471014	0.340162	0.956067	0.871755	1.04853	0.00944487	30.4927	Emilsson
MMP3	rs575027	Wald ratio	1	0.439	0.0230769	0.0242308	0.340904	1.02335	0.97588	1.07312	0.0332969	110.151	Emilsson
CHST6	rs8051241	Wald ratio	1	0.834	0.0560284	0.0588652	0.341195	1.05763	0.942379	1.18697	0.00550481	17.7018	Emilsson
CD55	rs145807285	Wald ratio	1	0.74	0.0202312	0.0213873	0.344176	1.02044	0.978546	1.06412	0.0460667	154.436	Emilsson
KLK13	rs3760739	Wald ratio	1	0.659	0.0164948	0.0175258	0.346614	1.01663	0.982303	1.05216	0.0676602	232.08	Emilsson
TMEM190	rs35791293	Wald ratio	1	0.525	0.00640895	0.00681587	0.347064	1.00643	0.993074	1.01996	0.481937	2974.99	Emilsson
FCRL3	rs7522061	Wald ratio	1	0.47	0.00866373	0.0092511	0.349012	1.0087	0.990576	1.02716	0.231046	960.895	Emilsson
ISM2	rs28608714	Wald ratio	1	0.856	0.0594595	0.0635135	0.349186	1.06126	0.937042	1.20195	0.00539995	17.3628	Emilsson
AFP	rs6829551	Wald ratio	1	0.812	-0.0374332	0.040107	0.350648	0.963259	0.890437	1.04204	0.0106765	34.5118	Emilsson
AK1	rs77306199	Wald ratio	1	0.947	-0.04811	0.0515464	0.350648	0.953029	0.861448	1.05435	0.00850045	27.4175	Emilsson
WFDC5	rs35017113	Wald ratio	1	0.843	0.0340611	0.0366812	0.353111	1.03465	0.962873	1.11177	0.0138812	45.0171	Emilsson
FCGR2B	rs72633697	Wald ratio	1	0.683	-0.00665281	0.00717256	0.353648	0.993369	0.979502	1.00743	0.400738	2138.56	Emilsson
TF	rs4854760	Wald ratio	1	0.735	-0.0277533	0.0299559	0.354201	0.972628	0.917166	1.03144	0.0200731	65.5088	Emilsson
MPP7	rs2797593	Wald ratio	1	0.359	0.0512397	0.0553719	0.354772	1.05258	0.944321	1.17324	0.00673834	21.6954	Emilsson
WFIKKN1	rs11248941	Wald ratio	1	0.732	-0.0364532	0.0394089	0.354966	0.964203	0.892531	1.04163	0.0161684	52.5564	Emilsson
GSTM3	rs115929572	Wald ratio	1	0.935	-0.0301508	0.0326633	0.355967	0.970299	0.910127	1.03445	0.019254	62.7831	Emilsson
LGALS9	rs62055780	Wald ratio	1	0.753	-0.0330049	0.0359606	0.358719	0.967534	0.901687	1.03819	0.015329	49.7853	Emilsson
CPM	rs12298772	Wald ratio	1	0.923	-0.0561224	0.0612245	0.359317	0.945423	0.838515	1.06596	0.00546053	17.5586	Emilsson
FTCD	rs149024257	Wald ratio	1	0.938	1.46341	1.60279	0.36122	4.32069	0.186738	99.9708	0.0095805	30.9348	Emilsson
LUM	rs147752462	Wald ratio	1	0.988	-0.0410156	0.0449219	0.36122	0.959814	0.878919	1.04815	0.00621596	20.003	Emilsson
MPL	rs4660731	Wald ratio	1	0.663	0.0545455	0.06	0.363302	1.05606	0.938892	1.18785	0.00540703	17.3857	Emilsson
CCL23	rs712048	Wald ratio	1	0.9	-0.0154386	0.0170175	0.364292	0.98468	0.952378	1.01808	0.058482	198.642	Emilsson
MXRA7	rs1558251	Wald ratio	1	0.518	0.0195286	0.0215488	0.364804	1.01972	0.977549	1.06371	0.0440473	147.354	Emilsson
CARS	rs10833024	Wald ratio	1	0.673	-1.66667	1.85185	0.36812	0.188876	0.00501012	7.12039	0.00513382	16.5027	Emilsson
ZG16	rs62054863	Wald ratio	1	0.738	0.0612069	0.0681034	0.368794	1.06312	0.930274	1.21493	0.0052036	16.7281	Emilsson
CLEC6A	rs11829089	Wald ratio	1	0.817	0.0403509	0.0450292	0.370197	1.04118	0.953223	1.13724	0.0087437	28.209	Emilsson
ADAM23	rs1448903	Wald ratio	1	0.899	-0.0182495	0.0204842	0.372978	0.981916	0.943274	1.02214	0.0523672	176.725	Emilsson
COL23A1	rs2546644	Wald ratio	1	0.828	-0.0476471	0.0535294	0.373407	0.95347	0.858503	1.05894	0.00823164	26.5433	Emilsson
NAAA	rs58317633	Wald ratio	1	0.733	0.00885714	0.01	0.375772	1.0089	0.989315	1.02887	0.191797	758.926	Emilsson
CCL3	rs1102934	Wald ratio	1	0.887	-0.0124633	0.0140762	0.375932	0.987614	0.960739	1.01524	0.0932397	328.842	Emilsson
XXYLT1	rs55947051	Wald ratio	1	0.841	0.0310484	0.0350806	0.376126	1.03154	0.962992	1.10496	0.0164485	53.482	Emilsson
LILRB5	rs10405357	Wald ratio	1	0.513	-0.00583501	0.00663984	0.379516	0.994182	0.981327	1.0072	0.493684	3118.21	Emilsson
PNKP	rs56131457	Wald ratio	1	0.991	-0.0521583	0.0593525	0.379516	0.949179	0.84494	1.06628	0.00551437	17.7327	Emilsson
RPN1	rs7650934	Wald ratio	1	0.582	-0.0238494	0.0271967	0.380528	0.976433	0.925747	1.02989	0.0277923	91.4207	Emilsson
CD300E	rs8081669	Wald ratio	1	0.551	-0.0207407	0.0237037	0.381574	0.979473	0.935008	1.02605	0.0360708	119.671	Emilsson
RECQL	rs144436375	Wald ratio	1	0.98	-0.0149733	0.0171123	0.381574	0.985138	0.952645	1.01874	0.0342696	113.483	Emilsson
TYMP	rs131798	Wald ratio	1	0.773	-0.0343137	0.0392157	0.381574	0.966268	0.894781	1.04347	0.0146048	47.3984	Emilsson
POFUT1	rs6058523	Wald ratio	1	0.74	-0.0283105	0.0324201	0.382533	0.972086	0.912238	1.03586	0.0184554	60.1301	Emilsson
SELP	rs6136	Wald ratio	1	0.881	-8.37e-06	9.62e-06	0.3843	0.999992	0.999973	1.00001	0.226788	937.992	Emilsson
AGT	rs3789678	Wald ratio	1	0.908	-0.0262048	0.0301205	0.3843	0.974136	0.918291	1.03338	0.0184153	59.9971	Emilsson
FLT4	rs78183295	Wald ratio	1	0.749	-0.0313725	0.0362745	0.387113	0.969114	0.902605	1.04053	0.0156475	50.8363	Emilsson
ROR1	rs6671162	Wald ratio	1	0.677	-0.0286432	0.0331658	0.387788	0.971763	0.910603	1.03703	0.0173192	56.3629	Emilsson
SIGLEC9	rs1039405	Wald ratio	1	0.514	4.93e-06	5.72e-06	0.388942	1	0.999994	1.00002	0.649291	5920.66	Emilsson
LRP11	rs9371533	Wald ratio	1	0.376	0.00678788	0.00787879	0.388942	1.00681	0.991383	1.02248	0.319382	1500.67	Emilsson
SPINT2	rs71354995	Wald ratio	1	0.763	-6.07e-06	7.05e-06	0.389177	0.999994	0.99998	1.00001	0.376273	1929.24	Emilsson
C1RL	rs6488561	Wald ratio	1	0.695	0.022963	0.0266667	0.389177	1.02323	0.971121	1.07813	0.030906	101.989	Emilsson
PDCD5	rs4499344	Wald ratio	1	0.291	0.0235294	0.027451	0.391366	1.02381	0.970179	1.0804	0.0268318	88.1739	Emilsson
MANEA	rs4413619	Wald ratio	1	0.868	-6.23e-06	7.28e-06	0.392803	0.999994	0.999979	1.00001	0.522489	3499.23	Emilsson
NUDT9	rs10030035	Wald ratio	1	0.834	-0.0233645	0.0274143	0.394063	0.976906	0.9258	1.03083	0.0285308	93.9212	Emilsson
CSK	rs11636952	Wald ratio	1	0.314	-0.242424	0.284848	0.394734	0.784723	0.449002	1.37146	0.0117287	37.9537	Emilsson
TNFSF13B	rs1232641	Wald ratio	1	0.706	0.0435714	0.0514286	0.396871	1.04453	0.944378	1.15531	0.00813651	26.234	Emilsson
GLTPD2	rs9892407	Wald ratio	1	0.652	-0.0213178	0.0251938	0.397467	0.978908	0.931744	1.02846	0.0302062	99.6082	Emilsson
APMAP	rs2150649	Wald ratio	1	0.929	0.0255814	0.0302326	0.397467	1.02591	0.966886	1.08854	0.0243916	79.9547	Emilsson
ADH4	rs1800759	Wald ratio	1	0.622	-0.0350318	0.0414013	0.397467	0.965575	0.890316	1.04719	0.0115907	37.5019	Emilsson
CTSS	rs72702561	Wald ratio	1	0.924	0.013089	0.0157068	0.404657	1.01318	0.982459	1.04485	0.0819789	285.58	Emilsson
REG1A	rs1448213	Wald ratio	1	0.588	-0.0245455	0.0295455	0.406104	0.975753	0.920853	1.03393	0.0234504	76.7952	Emilsson
FCRL1	rs6427401	Wald ratio	1	0.447	0.0187279	0.0226148	0.4076	1.0189	0.974728	1.06508	0.0395946	131.844	Emilsson
GSKIP	rs76581717	Wald ratio	1	0.889	-0.0587097	0.0709677	0.408082	0.94298	0.820529	1.08371	0.00474153	15.2356	Emilsson
SEMA5A	rs16883128	Wald ratio	1	0.882	-5.92e-06	7.22e-06	0.412216	0.999994	0.99998	1.00001	0.40217	2151.35	Emilsson
TMEM132A	rs555835	Wald ratio	1	0.677	-0.00950704	0.0116197	0.413253	0.990538	0.968234	1.01336	0.141097	525.354	Emilsson
TIRAP	rs111577916	Wald ratio	1	0.98	0.0248619	0.0303867	0.413253	1.02517	0.965899	1.08809	0.0205477	67.0901	Emilsson
ALPP	rs12478529	Wald ratio	1	0.778	-0.0175141	0.0214689	0.414621	0.982638	0.942148	1.02487	0.0432882	144.699	Emilsson
ASAH2	rs2813297	Wald ratio	1	0.822	0.0114841	0.0141343	0.416505	1.01155	0.983912	1.03997	0.0937464	330.814	Emilsson
FLRT3	rs13038351	Wald ratio	1	0.783	-0.0160891	0.019802	0.416505	0.98404	0.946579	1.02298	0.0554644	187.791	Emilsson
CLIC5	rs76801943	Wald ratio	1	0.986	0.041868	0.0515298	0.416505	1.04276	0.942584	1.15358	0.0106468	34.4148	Emilsson
LRRC4C	rs998447	Wald ratio	1	0.538	-0.0379562	0.0467153	0.416505	0.962755	0.878519	1.05507	0.0093303	30.1193	Emilsson
KLKB1	rs4253305	Wald ratio	1	0.585	-0.0105155	0.0129897	0.418214	0.98954	0.964664	1.01506	0.114213	412.351	Emilsson
PLAUR	rs2302524	Wald ratio	1	0.82	0.0322727	0.04	0.419771	1.0328	0.95492	1.11703	0.0142877	46.3543	Emilsson
GRAMD1C	rs4422272	Wald ratio	1	0.659	0.00875203	0.010859	0.42026	1.00879	0.987547	1.03049	0.171096	660.107	Emilsson
F10	rs1475931	Wald ratio	1	0.825	-0.0440789	0.0552632	0.425092	0.956878	0.858649	1.06634	0.00667128	21.478	Emilsson
LILRA5	rs8109267	Wald ratio	1	0.712	0.0128505	0.0161215	0.425392	1.01293	0.981427	1.04545	0.075126	259.768	Emilsson
CD4	rs61916275	Wald ratio	1	0.71	0.0509259	0.0638889	0.425392	1.05224	0.928397	1.19261	0.00480324	15.4349	Emilsson
PRDX6	rs6671141	Wald ratio	1	0.85	0.0159806	0.0200969	0.426508	1.01611	0.976863	1.05693	0.0434951	145.422	Emilsson
NQO2	rs138616686	Wald ratio	1	0.626	0.0128736	0.0163218	0.430268	1.01296	0.981064	1.04589	0.0886042	310.904	Emilsson
MMP8	rs2846714	Wald ratio	1	0.768	0.0257642	0.0327511	0.431477	1.0261	0.962301	1.09413	0.0186875	60.9006	Emilsson
MSMB	rs11006489	Wald ratio	1	0.593	-0.00642857	0.00821429	0.433857	0.993592	0.977723	1.00972	0.340595	1651.82	Emilsson
C9	rs265721	Wald ratio	1	0.959	-0.0373333	0.048	0.4367	0.963355	0.876855	1.05839	0.0110585	35.7604	Emilsson
CRP	rs4287174	Wald ratio	1	0.691	-0.0251208	0.0323671	0.437678	0.975192	0.915248	1.03906	0.0182982	59.6082	Emilsson
EVA1C	rs6517101	Wald ratio	1	0.349	-0.0288889	0.0372222	0.437678	0.971524	0.90317	1.04505	0.0147225	47.7861	Emilsson
LRRC15	rs923931	Wald ratio	1	0.883	-0.0188725	0.0245098	0.4413	0.981304	0.935278	1.0296	0.0343951	113.914	Emilsson
RRM2B	rs28928597	Wald ratio	1	0.945	0.0163132	0.0212072	0.441756	1.01645	0.975063	1.05959	0.0390612	129.995	Emilsson
RIC3	rs12793446	Wald ratio	1	0.975	0.0560224	0.0728291	0.441756	1.05762	0.916931	1.2199	0.00621314	19.9938	Emilsson
CLN5	rs7996555	Wald ratio	1	0.946	0.0371429	0.0485714	0.444447	1.03784	0.943596	1.1415	0.0125156	40.5321	Emilsson
SERPINE2	rs68066031	Wald ratio	1	0.811	-5.9e-06	7.77e-06	0.447557	0.999994	0.999979	1.00001	0.318943	1497.64	Emilsson
VEGFC	rs112782083	Wald ratio	1	0.981	1.09e-05	1.44e-05	0.448079	1.00001	0.999983	1.00004	0.152109	573.712	Emilsson
ADGRE2	rs117569858	Wald ratio	1	0.984	-0.0399274	0.0526316	0.448079	0.960859	0.86668	1.06527	0.00955979	30.8673	Emilsson
IMPAD1	rs112433249	Wald ratio	1	0.992	-1.25e-05	1.66e-05	0.453255	0.999988	0.999955	1.00002	0.045332	151.856	Emilsson
AMIGO2	rs832716	Wald ratio	1	0.944	-0.0446097	0.0594796	0.453255	0.956371	0.851131	1.07462	0.00765058	24.6552	Emilsson
CASS4	rs117403184	Wald ratio	1	0.985	0.0436893	0.0582524	0.453255	1.04466	0.931941	1.17101	0.00501594	16.1218	Emilsson
HMHA1	rs76957023	Wald ratio	1	0.723	0.0424242	0.0568182	0.455265	1.04334	0.933383	1.16624	0.00697904	22.4758	Emilsson
PCSK1	rs1820177	Wald ratio	1	0.679	0.00564604	0.00760043	0.457568	1.00566	0.990792	1.02076	0.369764	1876.29	Emilsson
LECT2	rs248160	Wald ratio	1	0.67	0.0153846	0.0208333	0.460234	1.0155	0.974872	1.05783	0.0430455	143.852	Emilsson
APOBEC3G	rs738469	Wald ratio	1	0.903	-0.0330612	0.044898	0.461509	0.967479	0.88598	1.05648	0.0105153	33.9853	Emilsson
IL1R2	rs7561460	Wald ratio	1	0.567	0.012336	0.0167979	0.46272	1.01241	0.979623	1.0463	0.0712772	245.439	Emilsson
ST3GAL6	rs3796133	Wald ratio	1	0.943	5.95e-06	8.11e-06	0.463355	1.00001	0.99999	1.00002	0.367926	1861.53	Emilsson
GKN2	rs13008230	Wald ratio	1	0.973	0.0116773	0.0159236	0.463355	1.01175	0.980657	1.04382	0.0466239	156.395	Emilsson
C3	rs163494	Wald ratio	1	0.805	0.0223485	0.0306818	0.466372	1.0226	0.962917	1.08598	0.0218811	71.541	Emilsson
PDLIM4	rs6864922	Wald ratio	1	0.937	0.0118343	0.0162722	0.467059	1.0119	0.980141	1.0447	0.0539515	182.376	Emilsson
FAM3D	rs6807381	Wald ratio	1	0.925	0.020202	0.0277778	0.467059	1.02041	0.966337	1.0775	0.0217582	71.1305	Emilsson
CCL8	rs4795912	Wald ratio	1	0.804	5e-06	6.88e-06	0.467722	1	0.999992	1.00002	0.469096	2825.69	Emilsson
TIE1	rs1209384	Wald ratio	1	0.594	-0.0235	0.0325	0.469633	0.976774	0.916494	1.04102	0.0192931	62.9132	Emilsson
GNMT	rs9471987	Wald ratio	1	0.402	0.0325	0.045	0.470158	1.03303	0.945823	1.12829	0.0769267	266.514	Emilsson
PRSS57	rs9304936	Wald ratio	1	0.715	0.00901502	0.0125209	0.471525	1.00906	0.984594	1.03413	0.146229	547.737	Emilsson
AMICA1	rs4938490	Wald ratio	1	0.412	0.00527523	0.00733945	0.472295	1.00529	0.990931	1.01986	0.368415	1865.45	Emilsson
ADAMTS13	rs28493251	Wald ratio	1	0.894	-0.0114826	0.0159884	0.472645	0.988583	0.958084	1.02005	0.0897119	315.174	Emilsson
VAV1	rs56100731	Wald ratio	1	0.93	-0.0275482	0.0385675	0.475051	0.972828	0.902	1.04922	0.0171563	55.8237	Emilsson
FSTL3	rs61622571	Wald ratio	1	0.833	-0.0504065	0.0707317	0.476066	0.950843	0.827753	1.09224	0.00420922	13.518	Emilsson
DDX6	rs112799932	Wald ratio	1	0.756	-0.0445313	0.0625	0.476155	0.956446	0.846173	1.08109	0.00604452	19.4479	Emilsson
POGLUT1	rs115511641	Wald ratio	1	0.93	-0.0103785	0.014652	0.478738	0.989675	0.961658	1.01851	0.0873331	306.017	Emilsson
NCAM2	rs2826851	Wald ratio	1	0.733	-0.0132432	0.0191892	0.490106	0.986844	0.950417	1.02467	0.0535857	181.07	Emilsson
COLEC12	rs12957470	Wald ratio	1	0.696	-0.0316129	0.0458065	0.490106	0.968882	0.885685	1.05989	0.0101666	32.8468	Emilsson
GZMB	rs11539752	Wald ratio	1	0.776	0.00904255	0.0132979	0.496504	1.00908	0.983123	1.03573	0.110585	397.624	Emilsson
SULT2A1	rs296369	Wald ratio	1	0.843	0.0163889	0.0241667	0.49767	1.01652	0.969497	1.06583	0.0343054	113.606	Emilsson
PXDN	rs34008669	Wald ratio	1	0.502	0.0272152	0.0405063	0.501663	1.02759	0.949161	1.1125	0.0124818	40.4213	Emilsson
RSPO2	rs689275	Wald ratio	1	0.581	-0.0344	0.0512	0.501663	0.966185	0.873933	1.06818	0.00760747	24.5152	Emilsson
INPP5B	rs61778082	Wald ratio	1	0.865	-0.0115174	0.0171846	0.502722	0.988549	0.955807	1.02241	0.0698803	240.267	Emilsson
PDIA5	rs920900	Wald ratio	1	0.342	3.55e-06	5.33e-06	0.504985	1	0.999993	1.00001	0.62668	5368.38	Emilsson
CRTAM	rs2370794	Wald ratio	1	0.668	0.0186441	0.0279661	0.504985	1.01882	0.964477	1.07622	0.0247041	81.0048	Emilsson
ST3GAL1	rs7463447	Wald ratio	1	0.482	-0.0227027	0.0340541	0.504985	0.977553	0.914435	1.04503	0.0170903	55.6052	Emilsson
CNTNAP2	rs6943324	Wald ratio	1	0.572	0.0217172	0.0328283	0.508267	1.02195	0.958269	1.08987	0.0191955	62.5887	Emilsson
MIA	rs2233154	Wald ratio	1	0.93	-6.56e-06	9.97e-06	0.510324	0.999993	0.999974	1.00001	0.187488	737.942	Emilsson
HGFAC	rs2498323	Wald ratio	1	0.911	-4.37e-06	6.67e-06	0.51276	0.999996	0.999983	1.00001	0.502301	3227.57	Emilsson
LILRB1	rs74345525	Wald ratio	1	0.934	-5.19e-06	7.99e-06	0.515692	0.999995	0.999979	1.00001	0.377569	1939.92	Emilsson
OLFM1	rs11103667	Wald ratio	1	0.815	-0.0305699	0.0471503	0.516758	0.969893	0.884277	1.0638	0.0112324	36.3294	Emilsson
CNP	rs12602950	Wald ratio	1	0.704	0.0245989	0.0379679	0.517058	1.0249	0.951402	1.10408	0.014574	47.2968	Emilsson
METTL24	rs12189608	Wald ratio	1	0.956	0.0291005	0.0449735	0.517594	1.02953	0.942662	1.1244	0.0120205	38.9094	Emilsson
PLD3	rs8103643	Wald ratio	1	0.963	-0.0415094	0.0641509	0.517594	0.95934	0.845992	1.08788	0.00500437	16.0845	Emilsson
IL11RA	rs41274867	Wald ratio	1	0.928	-0.0168337	0.0260521	0.51818	0.983307	0.934358	1.03482	0.0332745	110.075	Emilsson
NFASC	rs6663324	Wald ratio	1	0.908	0.0133588	0.0209924	0.524539	1.01345	0.972596	1.05602	0.045874	153.758	Emilsson
COL15A1	rs7861925	Wald ratio	1	0.889	0.0211073	0.033218	0.525157	1.02133	0.956954	1.09004	0.0164835	53.5978	Emilsson
SCUBE1	rs2744874	Wald ratio	1	0.866	-0.0218519	0.0344444	0.525814	0.978385	0.914514	1.04672	0.0169192	55.0389	Emilsson
DKK1	rs1194614	Wald ratio	1	0.424	0.0141869	0.0224913	0.528191	1.01429	0.970546	1.06	0.0407957	136.013	Emilsson
STX8	rs60864581	Wald ratio	1	0.788	0.0294872	0.0467949	0.528605	1.02993	0.939666	1.12886	0.00813095	26.2159	Emilsson
DLK2	rs2125739	Wald ratio	1	0.753	-0.0323944	0.0514085	0.528605	0.968125	0.875329	1.07076	0.00750065	24.1683	Emilsson
DSC2	rs1790672	Wald ratio	1	0.883	-0.0316062	0.0502591	0.529437	0.968888	0.877995	1.06919	0.00769646	24.8042	Emilsson
FABP1	rs1545223	Wald ratio	1	0.681	-0.0168	0.0268	0.530747	0.98334	0.933021	1.03637	0.0271549	89.2653	Emilsson
SPON1	rs11023056	Wald ratio	1	0.557	0.0201005	0.0321608	0.531971	1.0203	0.957974	1.08669	0.0195432	63.7448	Emilsson
NCAM1	rs2288158	Wald ratio	1	0.874	-0.026087	0.0417391	0.531971	0.97425	0.897721	1.0573	0.0116511	37.6995	Emilsson
CXCL10	rs4859589	Wald ratio	1	0.505	-0.0300752	0.0481203	0.531971	0.970373	0.883035	1.06635	0.00884362	28.5342	Emilsson
SIRPB1	rs4814391	Wald ratio	1	0.841	-5.63e-06	9.02e-06	0.532854	0.999994	0.999977	1.00001	0.283725	1266.77	Emilsson
HYAL1	rs35768187	Wald ratio	1	0.99	-0.0356436	0.0574257	0.534804	0.964984	0.86226	1.07995	0.0050495	16.2302	Emilsson
HNRNPAB	rs72820961	Wald ratio	1	0.993	0.0291807	0.047138	0.535885	1.02961	0.938746	1.12927	0.0110365	35.6887	Emilsson
GNLY	rs7603438	Wald ratio	1	0.774	-0.00544612	0.00880649	0.536298	0.994569	0.977549	1.01188	0.260556	1126.87	Emilsson
APOE	rs7412	Wald ratio	1	0.937	-0.00930818	0.0150943	0.537455	0.990735	0.961854	1.02048	0.0746181	257.871	Emilsson
CD209	rs62126592	Wald ratio	1	0.266	-0.20904	0.338983	0.537455	0.811363	0.41751	1.57675	0.0489344	164.544	Emilsson
MAN1A2	rs1289863	Wald ratio	1	0.692	0.0195238	0.0319048	0.540577	1.01972	0.957902	1.08552	0.0187986	61.2697	Emilsson
CD274	rs1411262	Wald ratio	1	0.736	0.0141935	0.0232258	0.541126	1.01429	0.969157	1.06154	0.0373452	124.063	Emilsson
CDH11	rs59614634	Wald ratio	1	0.89	-0.00759651	0.0124533	0.541862	0.992432	0.968502	1.01695	0.126254	462.101	Emilsson
SIGLEC7	rs2691254	Wald ratio	1	0.507	0.025	0.0410256	0.542276	1.02532	0.946097	1.11117	0.0121656	39.3848	Emilsson
KLK1	rs111477094	Wald ratio	1	0.98	-0.040107	0.0668449	0.548506	0.960687	0.842718	1.09517	0.00548314	17.6318	Emilsson
ALDH3A1	rs2108967	Wald ratio	1	0.685	-0.0207254	0.034715	0.550497	0.979488	0.915059	1.04845	0.0160748	52.2471	Emilsson
NOV	rs17791208	Wald ratio	1	0.76	0.0189076	0.0319328	0.55378	1.01909	0.95726	1.08491	0.0206637	67.4769	Emilsson
PLAT	rs77346091	Wald ratio	1	0.973	0.0236794	0.0400729	0.554581	1.02396	0.946614	1.10763	0.0158362	51.4591	Emilsson
VIT	rs1468810	Wald ratio	1	0.391	0.0153846	0.0263158	0.558806	1.0155	0.964453	1.06926	0.0290548	95.6977	Emilsson
ALOX15B	rs8073913	Wald ratio	1	0.672	0.0242038	0.0414013	0.558806	1.0245	0.944648	1.1111	0.0108661	35.1314	Emilsson
HSD17B14	rs473464	Wald ratio	1	0.498	0.0268966	0.0462069	0.560506	1.02726	0.938316	1.12464	0.0105123	33.9756	Emilsson
AP1G2	rs12897422	Wald ratio	1	0.858	-0.0201493	0.0347015	0.56148	0.980052	0.915611	1.04903	0.0175015	56.9668	Emilsson
PYGL	rs2297890	Wald ratio	1	0.358	0.0327869	0.0565574	0.56211	1.03333	0.924904	1.15447	0.00684176	22.0307	Emilsson
C1R	rs16933084	Wald ratio	1	0.883	0.0114583	0.0197917	0.562625	1.01152	0.973037	1.05153	0.0476057	159.853	Emilsson
SPP1	rs1381949	Wald ratio	1	0.491	0.0282443	0.048855	0.56318	1.02865	0.934717	1.13202	0.00857772	27.6689	Emilsson
IL23R	rs111379368	Wald ratio	1	0.942	-0.0207182	0.0359116	0.563991	0.979495	0.912922	1.05092	0.0143194	46.4588	Emilsson
CDCP1	rs7621542	Wald ratio	1	0.8	0.0255556	0.0444444	0.565291	1.02588	0.940301	1.11926	0.010368	33.5042	Emilsson
IGFBP1	rs2453849	Wald ratio	1	0.757	0.0367521	0.0641026	0.566419	1.03744	0.914947	1.17632	0.00503621	16.1873	Emilsson
ECH1	rs4802890	Wald ratio	1	0.92	0.0106942	0.0187617	0.568678	1.01075	0.974258	1.04861	0.0418179	139.57	Emilsson
KIAA1549L	rs12792396	Wald ratio	1	0.381	-0.00842825	0.0148064	0.5692	0.991607	0.963244	1.02081	0.0909023	319.774	Emilsson
CACNA2D3	rs1868513	Wald ratio	1	0.547	-0.0262411	0.0460993	0.5692	0.9741	0.889945	1.06621	0.00985267	31.8224	Emilsson
HSPB1	rs2868371	Wald ratio	1	0.767	-0.222672	0.392713	0.570707	0.800377	0.37069	1.72814	0.021806	71.29	Emilsson
SMOC1	rs1958078	Wald ratio	1	0.864	-0.0199219	0.0351562	0.570941	0.980275	0.915003	1.0502	0.0154015	50.0244	Emilsson
FAM20A	rs4968917	Wald ratio	1	0.881	-0.0307692	0.0543956	0.571627	0.969699	0.871635	1.0788	0.00694537	22.3667	Emilsson
CPQ	rs145746079	Wald ratio	1	0.972	-1.09e-05	1.93e-05	0.571926	0.999989	0.999951	1.00003	0.0770812	267.093	Emilsson
CST5	rs2071444	Wald ratio	1	0.799	0.00582524	0.0103155	0.572274	1.00584	0.98571	1.02639	0.218086	891.962	Emilsson
SIGLEC14	rs16982907	Wald ratio	1	0.824	0.00576471	0.0102353	0.573286	1.00578	0.985805	1.02616	0.20956	847.846	Emilsson
ESM1	rs4242051	Wald ratio	1	0.759	0.0333333	0.0593496	0.574359	1.0339	0.920359	1.16144	0.00553476	17.7987	Emilsson
PCOLCE2	rs4683702	Wald ratio	1	0.63	0.00895884	0.0159806	0.575066	1.009	0.977885	1.0411	0.0795193	276.272	Emilsson
SMPD1	rs1050239	Wald ratio	1	0.715	-0.0135484	0.0241935	0.575479	0.986543	0.940854	1.03445	0.0391656	130.357	Emilsson
MAP2K2	rs148318314	Wald ratio	1	0.983	-0.0371353	0.066313	0.575479	0.963546	0.846108	1.09728	0.00475024	15.2638	Emilsson
PDIA3	rs3110081	Wald ratio	1	0.821	-0.0242268	0.043299	0.575804	0.976064	0.896647	1.06252	0.0110619	35.7717	Emilsson
SERPINF1	rs1136287	Wald ratio	1	0.665	0.0101877	0.0182306	0.576282	1.01024	0.974779	1.04699	0.0619889	211.341	Emilsson
SERPINA11	rs17090881	Wald ratio	1	0.835	0.0166667	0.0298611	0.576749	1.01681	0.959003	1.07809	0.0228552	74.8006	Emilsson
FKBP7	rs10930831	Wald ratio	1	0.768	0.0120548	0.0216438	0.577553	1.01213	0.970089	1.05599	0.047475	159.392	Emilsson
SCGB3A1	rs382266	Wald ratio	1	0.924	-0.032766	0.0595745	0.582319	0.967765	0.861111	1.08763	0.00775624	24.9984	Emilsson
PCOLCE	rs4729597	Wald ratio	1	0.644	-0.02	0.0366667	0.585441	0.980199	0.912227	1.05324	0.0148563	48.2269	Emilsson
TXNRD1	rs7306771	Wald ratio	1	0.636	-0.0313043	0.0573913	0.585441	0.969181	0.866068	1.08457	0.00612328	19.7029	Emilsson
MANF	rs1552074	Wald ratio	1	0.859	-0.0127877	0.0235294	0.586801	0.987294	0.942796	1.03389	0.0370336	122.988	Emilsson
CFB	rs4151671	Wald ratio	1	0.949	-0.0134995	0.0249221	0.588048	0.986591	0.939557	1.03598	0.0897675	315.388	Emilsson
KLK10	rs2569454	Wald ratio	1	0.641	-0.00864197	0.0160494	0.590258	0.991395	0.960695	1.02308	0.0754905	261.132	Emilsson
FOXO3	rs79044525	Wald ratio	1	0.99	-0.0266667	0.0495238	0.590258	0.973686	0.883615	1.07294	0.00545738	17.5485	Emilsson
SEMA3C	rs10262428	Wald ratio	1	0.675	0.025	0.0465278	0.591051	1.02532	0.935949	1.12321	0.00909792	29.3623	Emilsson
RBP4	rs56057449	Wald ratio	1	0.899	-0.0273148	0.0509259	0.591707	0.973055	0.88062	1.07519	0.00847264	27.327	Emilsson
EDAR	rs141332418	Wald ratio	1	0.99	-7.34e-06	1.37e-05	0.592156	0.999993	0.999966	1.00002	0.0823997	287.178	Emilsson
FCRL6	rs12083967	Wald ratio	1	0.836	0.0307692	0.058042	0.596028	1.03125	0.920358	1.1555	0.00560728	18.0332	Emilsson
SPINT1	rs35395149	Wald ratio	1	0.952	0.0260563	0.0492958	0.597103	1.0264	0.931869	1.13052	0.00737131	23.7485	Emilsson
SCARA5	rs2727013	Wald ratio	1	0.67	0.014786	0.0280156	0.597654	1.0149	0.96067	1.07218	0.0292069	96.2137	Emilsson
BCHE	rs62295996	Wald ratio	1	0.811	0.00948081	0.0180587	0.599583	1.00953	0.974419	1.0459	0.0601617	204.713	Emilsson
PTK7	rs41274898	Wald ratio	1	0.898	-0.0388889	0.0740741	0.599583	0.961858	0.831874	1.11215	0.00480769	15.4493	Emilsson
PCDH9	rs1927820	Wald ratio	1	0.846	-0.0180451	0.0345865	0.601852	0.982117	0.917746	1.051	0.0184367	60.0682	Emilsson
CTSF	rs607736	Wald ratio	1	0.701	0.02	0.0383333	0.601852	1.0202	0.946359	1.09981	0.013582	44.0333	Emilsson
PTPRU	rs2179795	Wald ratio	1	0.725	0.024026	0.0461039	0.602278	1.02432	0.935815	1.12119	0.00945676	30.5314	Emilsson
VTI1B	rs7149221	Wald ratio	1	0.83	0.0297297	0.0574324	0.604705	1.03018	0.9205	1.15292	0.00618131	19.8908	Emilsson
CCL25	rs77625270	Wald ratio	1	0.924	5.11e-06	9.89e-06	0.605389	1.00001	0.999986	1.00002	0.20563	827.831	Emilsson
DLL1	rs6456202	Wald ratio	1	0.29	-0.03125	0.0607143	0.606759	0.969233	0.860493	1.09172	0.00516562	16.6054	Emilsson
ICOSLG	rs11558819	Wald ratio	1	0.744	-0.240506	0.468354	0.607592	0.78623	0.313963	1.96889	0.237737	997.403	Emilsson
CD300A	rs2272111	Wald ratio	1	0.788	0.00942529	0.0183908	0.608301	1.00947	0.973731	1.04652	0.0632223	215.83	Emilsson
CXCL12	rs148502670	Wald ratio	1	0.985	-0.0588235	0.115546	0.610689	0.942873	0.751793	1.18252	0.00669532	21.556	Emilsson
ALPPL2	rs10933394	Wald ratio	1	0.642	-0.0177083	0.0348958	0.61183	0.982448	0.917499	1.05199	0.0169453	55.1253	Emilsson
ECI2	rs13437316	Wald ratio	1	0.712	-0.0253731	0.05	0.61183	0.974946	0.883934	1.07533	0.00736397	23.7247	Emilsson
TAPBPL	rs12964	Wald ratio	1	0.49	0.00334448	0.00668896	0.617075	1.00335	0.990282	1.01659	0.402144	2151.11	Emilsson
FAH	rs11555096	Wald ratio	1	0.979	7.25e-06	1.45e-05	0.617075	1.00001	0.999979	1.00004	0.094999	335.698	Emilsson
SIRPG	rs2281808	Wald ratio	1	0.678	0.0136364	0.0272727	0.617075	1.01373	0.960964	1.06939	0.0255709	83.9217	Emilsson
BPIFB1	rs7263028	Wald ratio	1	0.885	-0.0189003	0.0378007	0.617075	0.981277	0.911203	1.05674	0.0172368	56.0902	Emilsson
EFEMP1	rs1985162	Wald ratio	1	0.79	0.0196721	0.0393443	0.617075	1.01987	0.944176	1.10163	0.0111117	35.9343	Emilsson
SAA1	rs11024616	Wald ratio	1	0.89	-3.59e-06	7.27e-06	0.621036	0.999996	0.999982	1.00001	0.296226	1346.07	Emilsson
TNFRSF11B	rs77914317	Wald ratio	1	0.963	0.0283154	0.0573477	0.621483	1.02872	0.919352	1.1511	0.00554711	17.8386	Emilsson
SHANK3	rs6010042	Wald ratio	1	0.748	-0.0116208	0.0235474	0.621655	0.988446	0.943864	1.03514	0.0403114	134.331	Emilsson
TMEM132C	rs28654182	Wald ratio	1	0.676	-0.0117021	0.0237589	0.62234	0.988366	0.943396	1.03548	0.0348353	115.424	Emilsson
OAS1	rs11066452	Wald ratio	1	0.702	-0.022449	0.0455782	0.62234	0.977801	0.894239	1.06917	0.00904103	29.177	Emilsson
GPNMB	rs28458177	Wald ratio	1	0.658	0.0120755	0.0245283	0.622502	1.01215	0.96464	1.062	0.0316063	104.376	Emilsson
NME2	rs12952884	Wald ratio	1	0.6	0.21147	0.430108	0.622955	1.23549	0.531772	2.87048	0.0373637	124.127	Emilsson
IFNLR1	rs12046369	Wald ratio	1	0.853	0.020082	0.0409836	0.624134	1.02028	0.941533	1.10562	0.0149306	48.4716	Emilsson
SERPINA5	rs8009930	Wald ratio	1	0.864	0.0240838	0.0492147	0.624586	1.02438	0.93018	1.12811	0.00857333	27.6546	Emilsson
IL12B	rs983825	Wald ratio	1	0.691	-0.0066	0.0136	0.627468	0.993422	0.967291	1.02026	0.10676	382.223	Emilsson
NRCAM	rs1034825	Wald ratio	1	0.534	0.0281818	0.0581818	0.62812	1.02858	0.917728	1.15283	0.00602202	19.3751	Emilsson
CSF1R	rs216140	Wald ratio	1	0.747	-0.0272	0.0576	0.636768	0.973167	0.869275	1.08948	0.00590597	18.9995	Emilsson
TPST1	rs313829	Wald ratio	1	0.679	0.0108553	0.0230263	0.637335	1.01091	0.966304	1.05758	0.0402858	134.242	Emilsson
EIF4A3	rs9889677	Wald ratio	1	0.644	-0.0280702	0.0596491	0.637935	0.97232	0.865037	1.09291	0.00595903	19.1712	Emilsson
TNFSF14	rs413141	Wald ratio	1	0.868	-0.022	0.047	0.639724	0.97824	0.892151	1.07264	0.00916608	29.5843	Emilsson
COL18A1	rs11702494	Wald ratio	1	0.764	0.0198864	0.0426136	0.640738	1.02009	0.938346	1.10894	0.0111702	36.1258	Emilsson
PSG9	rs28836541	Wald ratio	1	0.767	0.0221519	0.0474684	0.640738	1.0224	0.931568	1.12209	0.00892268	28.7916	Emilsson
ANG	rs28535078	Wald ratio	1	0.8	0.00518519	0.0112593	0.645138	1.0052	0.983259	1.02763	0.1458	545.854	Emilsson
LAG3	rs3782735	Wald ratio	1	0.607	0.0201299	0.0441558	0.648475	1.02033	0.935742	1.11257	0.011315	36.5993	Emilsson
HAPLN1	rs72772967	Wald ratio	1	0.677	0.0238462	0.0523077	0.648475	1.02413	0.924339	1.1347	0.00739108	23.8127	Emilsson
NTM	rs2511504	Wald ratio	1	0.588	0.00761155	0.0167979	0.650459	1.00764	0.975005	1.04137	0.0703322	241.939	Emilsson
IL17RD	rs59527464	Wald ratio	1	0.823	-0.00891089	0.019802	0.65271	0.991129	0.953398	1.03035	0.0475517	159.662	Emilsson
RPIA	rs6707271	Wald ratio	1	0.599	0.0237705	0.0532787	0.655486	1.02406	0.922511	1.13678	0.00715024	23.0312	Emilsson
BPGM	rs2161802	Wald ratio	1	0.486	-0.0256881	0.0577982	0.656721	0.974639	0.870252	1.09155	0.00593584	19.0962	Emilsson
IGFBP3	rs17172621	Wald ratio	1	0.982	0.0180583	0.0407767	0.657869	1.01822	0.940011	1.10294	0.00937623	30.269	Emilsson
KLK11	rs1048328	Wald ratio	1	0.934	-3.45e-06	7.81e-06	0.65873	0.999997	0.999981	1.00001	0.29239	1321.44	Emilsson
G6B	rs17207524	Wald ratio	1	0.962	-0.00897959	0.0204082	0.659937	0.991061	0.952201	1.03151	0.0394969	131.505	Emilsson
KIAA1467	rs2306765	Wald ratio	1	0.98	0.0286458	0.0651042	0.659937	1.02906	0.90578	1.16912	0.00578028	18.5928	Emilsson
TNFRSF1B	rs5745994	Wald ratio	1	0.965	-0.0233038	0.0530973	0.660742	0.976966	0.880404	1.08412	0.00776291	25.02	Emilsson
APOD	rs73196127	Wald ratio	1	0.71	-0.0316327	0.072449	0.662387	0.968862	0.840606	1.11669	0.00395493	12.6981	Emilsson
CA3	rs10504813	Wald ratio	1	0.768	-1.3245	3.04636	0.66372	0.265935	0.000678678	104.205	0.00812518	26.1972	Emilsson
BPI	rs1780617	Wald ratio	1	0.853	0.00547588	0.0126467	0.665022	1.00549	0.980874	1.03073	0.147532	553.462	Emilsson
IDUA	rs4690326	Wald ratio	1	0.549	0.00440945	0.0102362	0.666636	1.00442	0.984468	1.02477	0.199676	797.883	Emilsson
ST8SIA6	rs35512633	Wald ratio	1	0.915	0.0198157	0.0460829	0.667196	1.02001	0.931921	1.11643	0.00732469	23.5972	Emilsson
MPO	rs36089182	Wald ratio	1	0.945	0.00891531	0.0208024	0.668235	1.00896	0.968645	1.05094	0.047082	158.007	Emilsson
IL6ST	rs10471960	Wald ratio	1	0.874	0.0128049	0.029878	0.668235	1.01289	0.955275	1.07397	0.0236952	77.6163	Emilsson
DDX58	rs77802813	Wald ratio	1	0.84	0.0236842	0.0552632	0.668235	1.02397	0.918851	1.14111	0.00621036	19.9848	Emilsson
ANGPTL1	rs2184464	Wald ratio	1	0.893	0.016041	0.0375427	0.669181	1.01617	0.944082	1.09376	0.0164059	53.3412	Emilsson
TREML2	rs13207171	Wald ratio	1	0.869	-3.78e-06	8.84e-06	0.669319	0.999996	0.999979	1.00001	0.270504	1185.85	Emilsson
UNC5C	rs10030217	Wald ratio	1	0.581	0.0175	0.04125	0.671389	1.01765	0.938615	1.10335	0.0124641	40.3632	Emilsson
MDH1	rs10209140	Wald ratio	1	0.65	0.0189189	0.0445946	0.671389	1.0191	0.933806	1.11218	0.00996632	32.1931	Emilsson
PDGFRB	rs4705415	Wald ratio	1	0.54	2.57e-06	6.08e-06	0.673116	1	0.999991	1.00001	0.547722	3872.87	Emilsson
CROT	rs77463367	Wald ratio	1	0.93	-0.0143678	0.0344828	0.676922	0.985735	0.921314	1.05466	0.0157677	51.2331	Emilsson
MAN2B2	rs17724993	Wald ratio	1	0.433	0.00780347	0.0187861	0.67786	1.00783	0.9714	1.04563	0.0587832	199.729	Emilsson
CD36	rs11974777	Wald ratio	1	0.942	0.0224066	0.0539419	0.67786	1.02266	0.920057	1.1367	0.00634663	20.4262	Emilsson
CST7	rs227618	Wald ratio	1	0.763	0.00320248	0.00785124	0.683351	1.00321	0.987888	1.01876	0.338886	1639.29	Emilsson
APCS	rs71628140	Wald ratio	1	0.967	0.269886	0.667614	0.686025	1.30982	0.353937	4.84724	0.0316312	104.461	Emilsson
MTHFD1	rs113243087	Wald ratio	1	0.603	0.0238095	0.0590476	0.686782	1.0241	0.912175	1.14975	0.00527857	16.9705	Emilsson
MBL2	rs7899547	Wald ratio	1	0.643	0.00295082	0.0073224	0.686959	1.00296	0.988664	1.01745	0.384372	1996.69	Emilsson
ADAM22	rs6966166	Wald ratio	1	0.478	-0.0146893	0.0367232	0.689157	0.985418	0.916983	1.05896	0.0156342	50.7922	Emilsson
MAPK13	rs10447396	Wald ratio	1	0.75	-0.0142857	0.0362245	0.693311	0.985816	0.91825	1.05835	0.014406	46.7438	Emilsson
QSOX1	rs3767199	Wald ratio	1	0.629	-0.0127451	0.0323529	0.693626	0.987336	0.926671	1.05197	0.0194229	63.3449	Emilsson
FAS	rs982764	Wald ratio	1	0.705	-0.0102662	0.0262357	0.695572	0.989786	0.940176	1.04201	0.0287708	94.7348	Emilsson
F11	rs4253417	Wald ratio	1	0.626	0.00641026	0.0164103	0.696074	1.00643	0.974575	1.03933	0.0712205	245.229	Emilsson
POSTN	rs962462	Wald ratio	1	0.714	-0.0106557	0.027459	0.697972	0.989401	0.937559	1.04411	0.024315	79.6971	Emilsson
PILRA	rs12539172	Wald ratio	1	0.668	-2.4e-06	6.26e-06	0.701303	0.999998	0.999985	1.00001	0.738115	9013.46	Emilsson
PILRA	rs6979218	Wald ratio	1	0.723	-2.4e-06	6.26e-06	0.701303	0.999998	0.999985	1.00001	0.548302	3881.95	Emilsson
PMEL	rs3213122	Wald ratio	1	0.908	-0.0152318	0.0397351	0.701473	0.984884	0.911091	1.06465	0.0152376	49.484	Emilsson
PSAPL1	rs35791045	Wald ratio	1	0.819	-0.37702	0.987433	0.702596	0.685903	0.0990245	4.75097	0.091982	323.957	Emilsson
SFTPB	rs1130866	Wald ratio	1	0.466	-0.00349854	0.00918367	0.703239	0.996508	0.978731	1.01461	0.23421	978.08	Emilsson
STC1	rs4872190	Wald ratio	1	0.756	0.0243243	0.063964	0.703736	1.02462	0.903892	1.16148	0.00454556	14.6031	Emilsson
PGLYRP2	rs55866012	Wald ratio	1	0.842	0.00679012	0.0179012	0.704457	1.00681	0.9721	1.04277	0.0628451	214.456	Emilsson
LILRB2	rs56883673	Wald ratio	1	0.773	-0.00412903	0.0109677	0.706567	0.995879	0.9747	1.01752	0.210785	854.125	Emilsson
LANCL1	rs187097936	Wald ratio	1	0.985	-0.0192061	0.0512164	0.70766	0.980977	0.887284	1.08456	0.0180243	58.6999	Emilsson
SELPLG	rs73191242	Wald ratio	1	0.795	0.0143541	0.0382775	0.70766	1.01446	0.941134	1.09349	0.0142378	46.1902	Emilsson
SEMG1	rs1005283	Wald ratio	1	0.524	0.0228571	0.0609524	0.70766	1.02312	0.90791	1.15295	0.0054998	17.6856	Emilsson
TXNDC5	rs182714900	Wald ratio	1	0.985	-0.0192024	0.0516987	0.710318	0.980981	0.886449	1.08559	0.0135436	43.9072	Emilsson
GP5	rs34072658	Wald ratio	1	0.822	0.0233083	0.0631579	0.712092	1.02358	0.904402	1.15847	0.00517637	16.6402	Emilsson
LHB	rs79502742	Wald ratio	1	0.889	-0.00740741	0.020202	0.713868	0.99262	0.954084	1.03271	0.069635	239.361	Emilsson
CBLN4	rs6064315	Wald ratio	1	0.916	-0.0208333	0.0572917	0.71613	0.979382	0.875356	1.09577	0.00567293	18.2455	Emilsson
PEAR1	rs11264581	Wald ratio	1	0.823	-0.0163043	0.0451087	0.717766	0.983828	0.900579	1.07477	0.00986367	31.8583	Emilsson
PLA2G2A	rs4744	Wald ratio	1	0.766	0.0681458	0.190174	0.720094	1.07052	0.737421	1.55409	0.142736	532.473	Emilsson
IGLL1	rs140174	Wald ratio	1	0.254	0.00878378	0.025	0.725325	1.00882	0.960582	1.05949	0.0332037	109.832	Emilsson
CHI3L2	rs11556868	Wald ratio	1	0.871	-0.010559	0.0301242	0.725952	0.989497	0.932765	1.04968	0.0232997	76.2898	Emilsson
GRN	rs5848	Wald ratio	1	0.752	-0.0158228	0.0455696	0.728424	0.984302	0.900199	1.07626	0.00931137	30.0576	Emilsson
C7	rs74480769	Wald ratio	1	0.982	-5.55e-06	1.61e-05	0.730512	0.999994	0.999963	1.00003	0.0443455	148.398	Emilsson
LY9	rs540254	Wald ratio	1	0.683	-0.00725552	0.0211356	0.731385	0.992771	0.952485	1.03476	0.0435139	145.488	Emilsson
NPNT	rs78213340	Wald ratio	1	0.93	0.0130573	0.0382166	0.732602	1.01314	0.940027	1.09195	0.0128372	41.5872	Emilsson
PSG3	rs8111762	Wald ratio	1	0.739	-0.00516529	0.0152893	0.735485	0.994848	0.965478	1.02511	0.0903661	317.7	Emilsson
PLEKHA7	rs407354	Wald ratio	1	0.893	-0.0164444	0.0488889	0.736597	0.98369	0.893806	1.08261	0.00967454	31.2414	Emilsson
SOD3	rs2695234	Wald ratio	1	0.919	-0.00543478	0.0163043	0.738883	0.99458	0.963299	1.02688	0.0806466	280.532	Emilsson
FETUB	rs56112115	Wald ratio	1	0.841	0.00786517	0.0238764	0.741844	1.0079	0.961816	1.05618	0.033894	112.196	Emilsson
BTD	rs13100619	Wald ratio	1	0.962	-3.14e-06	9.78e-06	0.747886	0.999997	0.999978	1.00002	0.149507	562.171	Emilsson
PZP	rs7311982	Wald ratio	1	0.698	0.0044	0.0138	0.749847	1.00441	0.977607	1.03195	0.105398	376.774	Emilsson
DNAJC10	rs288336	Wald ratio	1	0.623	-0.0155556	0.0488889	0.750347	0.984565	0.894601	1.08358	0.00856105	27.6146	Emilsson
CFH	rs70621	Wald ratio	1	0.823	0.00541082	0.0170341	0.750753	1.00543	0.972412	1.03956	0.0725444	250.144	Emilsson
CTGF	rs9388953	Wald ratio	1	0.789	-0.00679887	0.0215297	0.752162	0.993224	0.952184	1.03603	0.0414896	138.427	Emilsson
MPG	rs77546475	Wald ratio	1	0.98	0.0190174	0.0602219	0.752162	1.0192	0.905727	1.14689	0.0156079	50.7055	Emilsson
APOH	rs1801690	Wald ratio	1	0.943	0.00797101	0.0253623	0.753304	1.008	0.95912	1.05938	0.0327563	108.302	Emilsson
CRHBP	rs6414971	Wald ratio	1	0.741	0.00410959	0.0131115	0.753952	1.00412	0.978642	1.03026	0.100228	356.234	Emilsson
WFDC1	rs400345	Wald ratio	1	0.791	-0.00576497	0.0184035	0.754088	0.994252	0.959027	1.03077	0.0672521	230.579	Emilsson
NAGPA	rs12599777	Wald ratio	1	0.818	-0.00928571	0.0296429	0.754088	0.990757	0.934835	1.05003	0.0233438	76.4377	Emilsson
XCL1	rs76400946	Wald ratio	1	0.507	0.017094	0.0547009	0.754661	1.01724	0.913822	1.13236	0.00684316	22.0352	Emilsson
CUZD1	rs10794613	Wald ratio	1	0.797	-0.019084	0.0610687	0.754661	0.981097	0.870421	1.10585	0.00555299	17.8576	Emilsson
CCL4L1	rs2687507	Wald ratio	1	0.747	0.00962343	0.0309623	0.755944	1.00967	0.950219	1.07284	0.0215907	70.5708	Emilsson
CLEC1B	rs544605	Wald ratio	1	0.781	0.00436508	0.0142857	0.759943	1.00437	0.976642	1.03289	0.0868933	304.329	Emilsson
HGF	rs984534	Wald ratio	1	0.785	-0.0139241	0.0455696	0.759943	0.986172	0.90191	1.07831	0.0084266	27.1773	Emilsson
INSL5	rs17495511	Wald ratio	1	0.722	-0.015493	0.0514085	0.763132	0.984626	0.890249	1.08901	0.00809447	26.0974	Emilsson
MGAT4B	rs58413676	Wald ratio	1	0.984	-4.16e-06	1.39e-05	0.764177	0.999996	0.999969	1.00002	0.0867683	303.85	Emilsson
DKK3	rs113672631	Wald ratio	1	0.774	0.0156863	0.0522876	0.764177	1.01581	0.916863	1.12544	0.00818959	26.4066	Emilsson
DEFB1	rs2741120	Wald ratio	1	0.583	-0.00485934	0.0163683	0.766562	0.995152	0.963733	1.0276	0.0743341	256.81	Emilsson
TCN2	rs4820023	Wald ratio	1	0.584	-0.0034296	0.0117329	0.770051	0.996576	0.97392	1.01976	0.149127	560.492	Emilsson
ENTPD1	rs4918970	Wald ratio	1	0.573	0.0139706	0.0485294	0.77344	1.01407	0.922058	1.11526	0.00905087	29.209	Emilsson
PLXDC2	rs11011369	Wald ratio	1	0.908	-0.0172897	0.0607477	0.775939	0.982859	0.872533	1.10714	0.00765123	24.6573	Emilsson
CST4	rs7270028	Wald ratio	1	0.896	0.0060215	0.0215054	0.779478	1.00604	0.964516	1.04935	0.0402974	134.282	Emilsson
TBL2	rs118120097	Wald ratio	1	0.988	0.0207207	0.0743243	0.780408	1.02094	0.882537	1.18104	0.00467449	15.0192	Emilsson
ART4	rs3887182	Wald ratio	1	0.611	0.00249653	0.00901526	0.781839	1.0025	0.984941	1.02037	0.247111	1049.64	Emilsson
NBL1	rs12408663	Wald ratio	1	0.788	0.0144828	0.0524138	0.782306	1.01459	0.915534	1.12436	0.0070247	22.6239	Emilsson
LILRA3	rs398217	Wald ratio	1	0.773	-1.85e-06	6.76e-06	0.784231	0.999998	0.999985	1.00001	0.539608	3748.26	Emilsson
EFNB2	rs12427554	Wald ratio	1	0.891	-0.0171975	0.0630573	0.785063	0.98295	0.868672	1.11226	0.00478777	15.385	Emilsson
NOTUM	rs114341171	Wald ratio	1	0.949	0.0203774	0.0754717	0.78716	1.02059	0.880252	1.18329	0.00679764	21.8876	Emilsson
DDC	rs115538399	Wald ratio	1	0.99	-0.0502793	0.18622	0.78716	0.950964	0.660162	1.36986	0.00570971	18.3645	Emilsson
ARMC5	rs143771583	Wald ratio	1	0.989	-0.0162978	0.0603622	0.78716	0.983834	0.874059	1.1074	0.00537442	17.2803	Emilsson
LRP8	rs10218811	Wald ratio	1	0.725	0.0114458	0.0427711	0.789003	1.01151	0.930172	1.09996	0.010988	35.5299	Emilsson
TIMP3	rs1079734	Wald ratio	1	0.633	-0.00180276	0.00678685	0.790528	0.998199	0.985009	1.01157	0.413165	2251.57	Emilsson
BST1	rs16892260	Wald ratio	1	0.847	1.54e-06	5.81e-06	0.791497	1	0.99999	1.00001	0.58316	4474	Emilsson
NTRK3	rs9944243	Wald ratio	1	0.879	-0.0108597	0.0411765	0.791983	0.989199	0.912501	1.07234	0.0103894	33.574	Emilsson
CTSC	rs55897509	Wald ratio	1	0.918	0.00313175	0.0118791	0.79206	1.00314	0.98005	1.02677	0.129095	474.041	Emilsson
SERPINA3	rs61976132	Wald ratio	1	0.825	0.00977778	0.0373333	0.793395	1.00983	0.938572	1.08649	0.014618	47.4418	Emilsson
MMP7	rs11568819	Wald ratio	1	0.945	0.00677291	0.0258964	0.793677	1.0068	0.956969	1.05922	0.0261958	86.0278	Emilsson
DSCAM	rs117342730	Wald ratio	1	0.972	0.0177515	0.0680473	0.794193	1.01791	0.890813	1.16314	0.00621853	20.0113	Emilsson
NTNG1	rs115668827	Wald ratio	1	0.949	-3.16e-06	1.22e-05	0.794864	0.999997	0.999973	1.00002	0.146446	548.686	Emilsson
REG3G	rs429694	Wald ratio	1	0.794	-0.00410678	0.0158111	0.795064	0.995902	0.965512	1.02725	0.0775846	268.985	Emilsson
CNDP1	rs62099911	Wald ratio	1	0.816	0.00608696	0.0234783	0.795435	1.00611	0.960856	1.05349	0.0357418	118.539	Emilsson
LILRA6	rs36629	Wald ratio	1	0.615	-0.00629371	0.0244755	0.797068	0.993726	0.94718	1.04256	0.0387345	128.864	Emilsson
MIF	rs5760120	Wald ratio	1	0.558	0.00606061	0.0238636	0.79952	1.00608	0.960105	1.05425	0.0343791	113.859	Emilsson
RPS27A	rs2917775	Wald ratio	1	0.944	-0.015493	0.0610329	0.799614	0.984626	0.873613	1.10975	0.00479677	15.414	Emilsson
ACP1	rs58461606	Wald ratio	1	0.639	-1.68e-06	6.7e-06	0.802587	0.999998	0.999985	1.00001	0.589108	4585.07	Emilsson
ADH5	rs1453873	Wald ratio	1	0.742	-0.387324	1.5493	0.802587	0.678871	0.0325837	14.1441	0.0308809	101.904	Emilsson
AGRP	rs28526086	Wald ratio	1	0.951	0.00804829	0.0321932	0.802587	1.00808	0.946438	1.07374	0.0230207	75.3551	Emilsson
MMP9	rs6094239	Wald ratio	1	0.959	0.00787234	0.0319149	0.805166	1.0079	0.946787	1.07296	0.0173711	56.535	Emilsson
IL5RA	rs6800335	Wald ratio	1	0.665	-0.00536278	0.0217666	0.805391	0.994652	0.95311	1.038	0.0447729	149.895	Emilsson
MASP1	rs28945068	Wald ratio	1	0.983	-4.19e-06	1.71e-05	0.806104	0.999996	0.999962	1.00003	0.0556176	188.34	Emilsson
HPX	rs12806581	Wald ratio	1	0.765	-0.017094	0.0700855	0.807306	0.983051	0.856876	1.12781	0.00492188	15.818	Emilsson
CRELD1	rs7615408	Wald ratio	1	0.73	1.78e-06	7.33e-06	0.807817	1	0.999987	1.00002	0.402123	2150.93	Emilsson
IL17A	rs187698899	Wald ratio	1	0.99	0.0313112	0.129159	0.808451	1.03181	0.801044	1.32905	0.0051702	16.6202	Emilsson
FAM171B	rs76851721	Wald ratio	1	0.805	0.00432692	0.0182692	0.812779	1.00434	0.96901	1.04095	0.0543309	183.733	Emilsson
CHGA	rs9658667	Wald ratio	1	0.984	0.00631136	0.026648	0.812779	1.00633	0.95512	1.06029	0.0160075	52.0248	Emilsson
TAPBP	rs146306986	Wald ratio	1	0.99	-2.5e-06	1.07e-05	0.815503	0.999997	0.999976	1.00002	0.125738	459.942	Emilsson
GFRA1	rs4269847	Wald ratio	1	0.731	0.00581818	0.0250909	0.816628	1.00584	0.957567	1.05654	0.0297416	98.0293	Emilsson
CCL27	rs2070074	Wald ratio	1	0.907	0.00778816	0.0342679	0.820212	1.00782	0.942351	1.07783	0.0173832	56.575	Emilsson
B3GNT2	rs11125907	Wald ratio	1	0.63	0.0120968	0.0540323	0.82285	1.01217	0.910459	1.12524	0.00716829	23.0897	Emilsson
CCL14	rs7222922	Wald ratio	1	0.921	-0.00255591	0.0117146	0.827287	0.997447	0.974806	1.02061	0.128306	470.72	Emilsson
COL11A2	rs1050673	Wald ratio	1	0.647	0.00612245	0.0281633	0.827903	1.00614	0.952107	1.06324	0.0274183	90.1558	Emilsson
CHI3L1	rs903357	Wald ratio	1	0.438	0.00149893	0.00695931	0.829467	1.0015	0.987932	1.01525	0.429471	2407.33	Emilsson
IL1RL1	rs11676124	Wald ratio	1	0.644	-0.00226904	0.0105348	0.829467	0.997734	0.977343	1.01855	0.174557	676.281	Emilsson
NTN1	rs72809988	Wald ratio	1	0.833	0.00446809	0.0208511	0.830324	1.00448	0.964255	1.04638	0.0614592	209.417	Emilsson
RCN1	rs477838	Wald ratio	1	0.732	0.0116279	0.0542636	0.830324	1.0117	0.90962	1.12523	0.00652913	21.0174	Emilsson
PTGR1	rs112140014	Wald ratio	1	0.952	-0.00440771	0.0206612	0.831067	0.995602	0.95609	1.03675	0.0481705	161.846	Emilsson
TNFSF12	rs80067372	Wald ratio	1	0.708	-0.00183486	0.00865007	0.832012	0.998167	0.981386	1.01523	0.240711	1013.83	Emilsson
FSTL1	rs1147707	Wald ratio	1	0.666	0.00505415	0.0238267	0.832012	1.00507	0.959209	1.05312	0.0341358	113.025	Emilsson
GXYLT1	rs139695917	Wald ratio	1	0.985	-4.63e-06	2.2e-05	0.833668	0.999995	0.999952	1.00004	0.0546557	184.894	Emilsson
CTSD	rs55861089	Wald ratio	1	0.888	0.00555556	0.02657	0.834377	1.00557	0.954544	1.05933	0.0340927	112.877	Emilsson
IGDCC4	rs8034057	Wald ratio	1	0.905	-0.00668605	0.0319767	0.834377	0.993336	0.93299	1.05759	0.0203479	66.4241	Emilsson
PDGFRA	rs67388297	Wald ratio	1	0.92	-0.00958333	0.0458333	0.834377	0.990462	0.905365	1.08356	0.00847872	27.3468	Emilsson
RET	rs2505535	Wald ratio	1	0.727	-0.00362319	0.0173913	0.834969	0.996383	0.962992	1.03093	0.0680343	233.457	Emilsson
AKR1A1	rs72688441	Wald ratio	1	0.929	2.13e-06	1.03e-05	0.835469	1	0.999982	1.00002	0.212771	864.348	Emilsson
CRISP2	rs586874	Wald ratio	1	0.5	-0.00281385	0.0136364	0.836518	0.99719	0.970891	1.0242	0.106722	382.072	Emilsson
CCL5	rs78655848	Wald ratio	1	0.818	-0.00355648	0.017364	0.837713	0.99645	0.963108	1.03095	0.0680316	233.447	Emilsson
ANGPT1	rs73701100	Wald ratio	1	0.983	-0.00924956	0.0453752	0.838474	0.990793	0.906481	1.08295	0.0109734	35.4823	Emilsson
IGLON5	rs35982135	Wald ratio	1	0.725	-0.0115385	0.0569231	0.839367	0.988528	0.884168	1.1052	0.00673888	21.6971	Emilsson
WFDC2	rs73112720	Wald ratio	1	0.959	-0.0116883	0.0606061	0.847071	0.98838	0.877677	1.11305	0.0041962	13.476	Emilsson
FRZB	rs72888404	Wald ratio	1	0.939	0.00544662	0.0283224	0.847501	1.00546	0.951167	1.06285	0.0241352	79.0933	Emilsson
B3GAT3	rs693698	Wald ratio	1	0.664	0.00260521	0.0136273	0.848387	1.00261	0.976184	1.02975	0.111106	399.73	Emilsson
SIGLEC12	rs1973095	Wald ratio	1	0.83	-1.36e-06	7.15e-06	0.848936	0.999999	0.999985	1.00001	0.392935	2069.97	Emilsson
IL1RL2	rs3917265	Wald ratio	1	0.446	-0.00424028	0.0222615	0.848936	0.995769	0.953255	1.04018	0.0395774	131.784	Emilsson
ANGPTL3	rs7547965	Wald ratio	1	0.658	-0.00526316	0.0276316	0.848936	0.994751	0.94231	1.05011	0.0233965	76.6147	Emilsson
PKDCC	rs893812	Wald ratio	1	0.731	-0.0059322	0.0313559	0.849945	0.994085	0.934831	1.0571	0.021904	71.6177	Emilsson
LIPN	rs10509554	Wald ratio	1	0.673	-0.00240296	0.0127542	0.850559	0.9976	0.972971	1.02285	0.128821	472.888	Emilsson
PGLYRP1	rs12980641	Wald ratio	1	0.693	-0.0055794	0.0296137	0.850559	0.994436	0.938359	1.05386	0.0231001	75.6209	Emilsson
CD300C	rs62087202	Wald ratio	1	0.969	-0.203252	1.08401	0.851269	0.816073	0.097499	6.83058	0.00818028	26.3763	Emilsson
ULBP3	rs17054300	Wald ratio	1	0.762	0.00818713	0.0438596	0.851922	1.00822	0.92517	1.09873	0.0106061	34.2818	Emilsson
CST1	rs4260306	Wald ratio	1	0.738	-0.00219966	0.0118443	0.852669	0.997803	0.974906	1.02124	0.135071	499.414	Emilsson
PRSS22	rs7204669	Wald ratio	1	0.7	0.0050193	0.027027	0.852669	1.00503	0.953178	1.05971	0.028174	92.7126	Emilsson
BTNL8	rs7721375	Wald ratio	1	0.507	-0.0043956	0.0238095	0.853531	0.995614	0.950219	1.04318	0.0372572	123.759	Emilsson
LMAN2	rs28419182	Wald ratio	1	0.769	-0.0112903	0.0612903	0.853848	0.988773	0.87685	1.11498	0.00546275	17.5658	Emilsson
SNCA	rs1372518	Wald ratio	1	0.775	-0.00424242	0.0233333	0.855725	0.995767	0.951252	1.04236	0.0379789	126.251	Emilsson
IL12RB2	rs4655701	Wald ratio	1	0.442	-0.00764331	0.0420382	0.855725	0.992386	0.913896	1.07762	0.0121587	39.362	Emilsson
NDST1	rs35413298	Wald ratio	1	0.683	-0.0097561	0.0536585	0.855725	0.990291	0.891431	1.10011	0.00655119	21.0889	Emilsson
MATN4	rs11086957	Wald ratio	1	0.747	0.00451389	0.0253472	0.858658	1.00452	0.955838	1.05569	0.0313513	103.507	Emilsson
CD58	rs61789231	Wald ratio	1	0.983	-0.0120112	0.0698324	0.863438	0.988061	0.86167	1.13299	0.0042835	13.7576	Emilsson
UST	rs11155591	Wald ratio	1	0.685	-0.563758	3.28859	0.863887	0.569066	0.000903354	358.482	0.00958084	30.9359	Emilsson
NPTX2	rs817765	Wald ratio	1	0.367	0.0106796	0.0650485	0.86959	1.01074	0.889749	1.14818	0.00492917	15.8416	Emilsson
VWA2	rs11595697	Wald ratio	1	0.903	-0.00417633	0.025522	0.870017	0.995832	0.947243	1.04691	0.032542	107.57	Emilsson
CNTFR	rs1571401	Wald ratio	1	0.88	-0.00573248	0.0350318	0.870017	0.994284	0.928305	1.06495	0.0208235	68.0097	Emilsson
TIMP2	rs2376999	Wald ratio	1	0.884	-0.00382775	0.0236842	0.871608	0.99618	0.950993	1.04351	0.0358338	118.856	Emilsson
CCL28	rs77957201	Wald ratio	1	0.947	0.00889831	0.0550847	0.871669	1.00894	0.905681	1.12397	0.00559088	17.9801	Emilsson
CD200	rs6808365	Wald ratio	1	0.745	0.00468085	0.0314894	0.881831	1.00469	0.944558	1.06865	0.0209827	68.541	Emilsson
LAMA4	rs116988496	Wald ratio	1	0.984	0.0108235	0.0729412	0.882037	1.01088	0.876217	1.16624	0.00568752	18.2927	Emilsson
UXS1	rs12617748	Wald ratio	1	0.87	-0.296804	2.00913	0.882558	0.74319	0.0144841	38.1336	0.0108488	35.0749	Emilsson
BPIFA2	rs141715080	Wald ratio	1	0.973	-0.00722611	0.048951	0.882643	0.9928	0.901973	1.09277	0.00966988	31.2262	Emilsson
CECR1	rs2231495	Wald ratio	1	0.609	-0.00111857	0.00760626	0.883086	0.998882	0.984101	1.01389	0.380627	1965.28	Emilsson
RGMA	rs11074135	Wald ratio	1	0.654	-0.00617284	0.0425926	0.884768	0.993846	0.914247	1.08038	0.0118772	38.4398	Emilsson
ERAP1	rs2013717	Wald ratio	1	0.771	-1.01e-06	6.95e-06	0.884919	0.999999	0.999985	1.00001	0.419539	2311.42	Emilsson
NPTXR	rs12628473	Wald ratio	1	0.987	3.26e-06	2.27e-05	0.885912	1	0.999959	1.00005	0.0261778	85.9671	Emilsson
CEL	rs45487303	Wald ratio	1	0.982	0.00291457	0.0211055	0.890165	1.00292	0.962278	1.04528	0.0349994	115.987	Emilsson
HS3ST3B1	rs61202270	Wald ratio	1	0.951	0.00708955	0.0522388	0.892047	1.00711	0.909102	1.1157	0.00669385	21.5512	Emilsson
KYNU	rs3768844	Wald ratio	1	0.789	-0.00193322	0.014587	0.894565	0.998069	0.969937	1.02702	0.107799	386.393	Emilsson
GGH	rs4739046	Wald ratio	1	0.92	0.002391	0.0182841	0.895958	1.00239	0.967107	1.03897	0.0744127	257.104	Emilsson
OBP2B	rs4962104	Wald ratio	1	0.808	0.00285714	0.022	0.896669	1.00286	0.960537	1.04705	0.0380083	126.353	Emilsson
ENDOU	rs2072117	Wald ratio	1	0.711	-0.00552147	0.0429448	0.897697	0.994494	0.914212	1.08183	0.0109187	35.3036	Emilsson
ENO1	rs115579221	Wald ratio	1	0.982	-0.00692124	0.0548926	0.899663	0.993103	0.891802	1.10591	0.00620643	19.9721	Emilsson
GABARAPL2	rs12449192	Wald ratio	1	0.36	0.0057554	0.047482	0.903523	1.00577	0.916394	1.10387	0.00890312	28.7279	Emilsson
ARHGAP1	rs5899	Wald ratio	1	0.989	0.00491018	0.0407186	0.904017	1.00492	0.927838	1.08841	0.0151702	49.2617	Emilsson
PRLR	rs16873193	Wald ratio	1	0.949	0.00810811	0.0675676	0.904483	1.00814	0.883093	1.1509	0.00477059	15.3295	Emilsson
INHBC	rs775249	Wald ratio	1	0.655	-0.00672269	0.0588235	0.909011	0.9933	0.885133	1.11468	0.00640006	20.5992	Emilsson
CFHR1	rs57809726	Wald ratio	1	0.862	7.72e-07	7.1e-06	0.913444	1	0.999987	1.00001	0.402071	2150.46	Emilsson
IL7R	rs6451229	Wald ratio	1	0.669	-0.00309735	0.0287611	0.91424	0.996907	0.942265	1.05472	0.0226204	74.0144	Emilsson
LGALS2	rs2281097	Wald ratio	1	0.434	-0.0030303	0.0285714	0.915534	0.996974	0.942678	1.0544	0.0262156	86.0946	Emilsson
IGFBPL1	rs10973757	Wald ratio	1	0.606	0.00608696	0.0591304	0.91801	1.00611	0.896006	1.12973	0.00631531	20.3247	Emilsson
LILRA4	rs2241384	Wald ratio	1	0.811	0.00378151	0.0369748	0.91854	1.00379	0.933617	1.07923	0.0173647	56.5136	Emilsson
HSP90B1	rs2576975	Wald ratio	1	0.698	-6.84e-07	6.74e-06	0.919194	0.999999	0.999986	1.00001	0.438624	2498.72	Emilsson
CHIT1	rs872583	Wald ratio	1	0.803	7.46e-07	7.46e-06	0.920344	1	0.999986	1.00002	0.362226	1816.31	Emilsson
EPHA1	rs4725617	Wald ratio	1	0.902	-9.98e-07	9.98e-06	0.920344	0.999999	0.999979	1.00002	0.25458	1092.2	Emilsson
PLG	rs12191307	Wald ratio	1	0.914	-0.0020073	0.020073	0.920344	0.997995	0.959493	1.03804	0.0472102	158.459	Emilsson
CKM	rs75727214	Wald ratio	1	0.982	0.00440917	0.0440917	0.920344	1.00442	0.921262	1.09508	0.0113653	36.764	Emilsson
CEACAM19	rs28483039	Wald ratio	1	0.768	-0.00564516	0.0596774	0.924637	0.994371	0.884606	1.11776	0.00547927	17.6192	Emilsson
MAPK14	rs851047	Wald ratio	1	0.584	-0.00582524	0.0621359	0.925308	0.994192	0.880195	1.12295	0.00515479	16.5704	Emilsson
ARL3	rs11191379	Wald ratio	1	0.897	-0.00276243	0.0303867	0.927565	0.997241	0.939582	1.05844	0.0242146	79.3599	Emilsson
CAPG	rs143448563	Wald ratio	1	0.983	1.79e-06	2e-05	0.928855	1	0.999963	1.00004	0.0655071	224.177	Emilsson
IGFLR1	rs7260184	Wald ratio	1	0.855	0.00135364	0.0152284	0.92917	1.00135	0.971908	1.03169	0.0866042	303.22	Emilsson
KLK14	rs2569491	Wald ratio	1	0.654	0.00119522	0.013745	0.930706	1.0012	0.974584	1.02853	0.114049	411.68	Emilsson
GFRAL	rs1032772	Wald ratio	1	0.904	-0.00257235	0.0302251	0.932177	0.997431	0.940058	1.05831	0.0167877	54.6036	Emilsson
HAVCR2	rs4704737	Wald ratio	1	0.836	-0.00106061	0.0125758	0.932788	0.99894	0.974619	1.02387	0.119445	433.8	Emilsson
PSMB1	rs756519	Wald ratio	1	0.531	-0.00121359	0.0150485	0.935724	0.998787	0.969758	1.02869	0.0845458	295.348	Emilsson
KIAA2013	rs11588551	Wald ratio	1	0.418	0.00280899	0.0348315	0.935724	1.00281	0.936636	1.07367	0.0154159	50.072	Emilsson
ITIH3	rs2535627	Wald ratio	1	0.472	0.00136612	0.0172131	0.936742	1.00137	0.968147	1.03573	0.066768	228.8	Emilsson
APOB	rs679899	Wald ratio	1	0.503	0.00203252	0.0256098	0.936742	1.00203	0.952979	1.05362	0.0302569	99.7807	Emilsson
MENT	rs12759273	Wald ratio	1	0.988	-0.00358744	0.0463378	0.93829	0.996419	0.90991	1.09115	0.0106126	34.303	Emilsson
SIGLEC6	rs2305771	Wald ratio	1	0.92	1e-06	1.3e-05	0.938685	1	0.999976	1.00003	0.1472	552	Emilsson
LYVE1	rs114527818	Wald ratio	1	0.951	-0.00298103	0.0406504	0.941541	0.997023	0.920668	1.07971	0.0126899	41.104	Emilsson
LGALS3	rs76426991	Wald ratio	1	0.912	-0.00132013	0.0181518	0.942023	0.998681	0.963775	1.03485	0.0589458	200.316	Emilsson
TPST2	rs9608491	Wald ratio	1	0.848	0.00289855	0.0400966	0.942372	1.0029	0.927103	1.0849	0.0110461	35.7201	Emilsson
COCH	rs35561078	Wald ratio	1	0.882	0.001417	0.0196356	0.942471	1.00142	0.96361	1.04071	0.0507966	171.141	Emilsson
BCAN	rs7541549	Wald ratio	1	0.767	-0.00248756	0.0373134	0.946847	0.997516	0.927167	1.0732	0.0144402	46.8564	Emilsson
PIANP	rs60889510	Wald ratio	1	0.911	-0.00402299	0.0632184	0.94926	0.995985	0.879914	1.12737	0.0049095	15.778	Emilsson
EXOSC1	rs7911122	Wald ratio	1	0.768	-0.00362319	0.0572464	0.949535	0.996383	0.89063	1.11469	0.00678637	21.8511	Emilsson
C1QL1	rs9915692	Wald ratio	1	0.463	-0.00143369	0.0229391	0.950165	0.998567	0.954665	1.04449	0.0387074	128.771	Emilsson
PLXNC1	rs6538487	Wald ratio	1	0.382	-0.00144928	0.0231884	0.950165	0.998552	0.954184	1.04498	0.0359667	119.313	Emilsson
QPCTL	rs7256197	Wald ratio	1	0.724	0.00168067	0.0294118	0.954431	1.00168	0.945571	1.06112	0.0226377	74.0721	Emilsson
FUT3	rs708686	Wald ratio	1	0.771	0.000608828	0.0108067	0.955073	1.00061	0.979638	1.02203	0.152423	575.109	Emilsson
RNPEP	rs59698324	Wald ratio	1	0.725	0.00107817	0.0191375	0.955073	1.00108	0.964224	1.03934	0.0548843	185.713	Emilsson
NOTCH2	rs3009190	Wald ratio	1	0.76	-0.00314961	0.0629921	0.960122	0.996855	0.881074	1.12785	0.00588386	18.928	Emilsson
GAA	rs12450199	Wald ratio	1	0.647	-0.000813008	0.0181572	0.964286	0.999187	0.964253	1.03539	0.0621959	212.094	Emilsson
TNFRSF21	rs9463326	Wald ratio	1	0.722	-0.00272727	0.0645455	0.966297	0.997276	0.878766	1.13177	0.00485733	15.6096	Emilsson
RNASE3	rs2771316	Wald ratio	1	0.723	-0.00140187	0.0345794	0.967662	0.998599	0.933161	1.06863	0.0183432	59.7578	Emilsson
SELE	rs4265482	Wald ratio	1	0.78	-0.0020979	0.0531469	0.968513	0.997904	0.899186	1.10746	0.0070181	22.6025	Emilsson
CXCL1	rs3117602	Wald ratio	1	0.972	-0.00152284	0.0406091	0.970086	0.998478	0.922086	1.0812	0.00844981	27.2528	Emilsson
ANKRD27	rs113282417	Wald ratio	1	0.987	-0.00180832	0.0488246	0.970455	0.998193	0.907098	1.09844	0.00784767	25.2954	Emilsson
PREP	rs1051484	Wald ratio	1	0.835	0.000662252	0.019426	0.972805	1.00066	0.963278	1.0395	0.0565453	191.67	Emilsson
CREB3L4	rs4845360	Wald ratio	1	0.453	0.000724638	0.0228261	0.974675	1.00072	0.95694	1.04651	0.0377515	125.466	Emilsson
MGP	rs67482087	Wald ratio	1	0.645	-0.00100503	0.0316583	0.974675	0.998995	0.938892	1.06295	0.0181353	59.0678	Emilsson
CHL1	rs13077895	Wald ratio	1	0.643	0.00105263	0.0352632	0.976186	1.00105	0.934201	1.07269	0.0165736	53.8956	Emilsson
C8G	rs11790360	Wald ratio	1	0.524	0.000660066	0.0224422	0.976536	1.00066	0.957598	1.04566	0.0457987	153.494	Emilsson
HK2	rs6732614	Wald ratio	1	0.597	0.00173913	0.0591304	0.976536	1.00174	0.892118	1.12483	0.00636363	20.4812	Emilsson
TDGF1	rs4682823	Wald ratio	1	0.713	-1.5e-07	5.33e-06	0.977527	1	0.999989	1.00001	0.723944	8386.59	Emilsson
MFGE8	rs12898558	Wald ratio	1	0.696	-0.00070922	0.0258865	0.978143	0.999291	0.949854	1.0513	0.033652	111.367	Emilsson
MRC2	rs2465430	Wald ratio	1	0.984	-0.00158311	0.0738786	0.982904	0.998418	0.863825	1.15398	0.00452297	14.5302	Emilsson
LMNB1	rs36105360	Wald ratio	1	0.982	-0.000714286	0.0357143	0.984043	0.999286	0.931728	1.07174	0.0110864	35.8517	Emilsson
TREM2	rs114812713	Wald ratio	1	0.955	0.00111111	0.0583333	0.984803	1.00111	0.892952	1.12237	0.0111391	36.0242	Emilsson
SPOCK2	rs1245547	Wald ratio	1	0.462	-0.000473934	0.0303318	0.987534	0.999526	0.941836	1.06075	0.0221319	72.3798	Emilsson
CXCL16	rs2326100	Wald ratio	1	0.63	-0.000645161	0.0419355	0.987725	0.999355	0.9205	1.08497	0.0112005	36.2248	Emilsson
SERPINA1	rs4905192	Wald ratio	1	0.726	-0.00476191	0.345238	0.988995	0.995249	0.505894	1.95796	0.0112289	36.3177	Emilsson
SLITRK3	rs62282371	Wald ratio	1	0.887	0.000289855	0.0284058	0.991858	1.00029	0.94612	1.05756	0.02386	78.1694	Emilsson
MET	rs7457973	Wald ratio	1	0.888	-0.000546448	0.0601093	0.992747	0.999454	0.888376	1.12442	0.00666136	21.4459	Emilsson
MMP13	rs111900470	Wald ratio	1	0.986	-0.000212314	0.0509554	0.996675	0.999788	0.904761	1.1048	0.00612459	19.7071	Emilsson
RAGE	rs204993	Wald ratio	1	0.72	-0.173333	0.0473333	0.000250281	0.840857	0.766357	0.9226	0.009072	199.177	Folkersen
EGF	rs2237045	Wald ratio	1	0.66	0.153846	0.0515385	0.00283509	1.16631	1.05425	1.29028	0.00758472	166.274	Folkersen
FABP4	rs77878271	Wald ratio	1	0.97	0.238462	0.0807692	0.00315334	1.26929	1.08345	1.48701	0.00393432	85.9332	Folkersen
TF	rs11589759	Wald ratio	1	0.63	0.105556	0.0366667	0.00399207	1.11133	1.03426	1.19414	0.0151049	333.662	Folkersen
TRAIL-R2	rs2293400	Wald ratio	1	0.68	-0.0548387	0.0219355	0.0124193	0.946638	0.906801	0.988225	0.0418227	949.61	Folkersen
CXCL16	rs35186877	Wald ratio	1	0.21	0.111765	0.0452941	0.0136048	1.11825	1.02325	1.22206	0.00958902	210.639	Folkersen
IL-6RA	rs4845661	Wald ratio	1	0.9	0.191667	0.0916667	0.0365362	1.21127	1.01207	1.44967	0.002592	56.5381	Folkersen
HSP_27	rs2868371	Wald ratio	1	0.76	0.0441176	0.0217647	0.0426596	1.04511	1.00146	1.09065	0.0421709	957.864	Folkersen
CX3CL1	rs683544	Wald ratio	1	0.58	0.065	0.0325	0.0455003	1.06716	1.0013	1.13735	0.019488	432.408	Folkersen
LEP	rs12537573	Wald ratio	1	0.62	-0.144737	0.0855263	0.0905873	0.86525	0.731712	1.02316	0.00272165	59.3738	Folkersen
OPG	rs7813395	Wald ratio	1	0.65	0.129412	0.0776471	0.0955807	1.13816	0.977481	1.32525	0.00328738	71.756	Folkersen
EN-RAGE	rs3014874	Wald ratio	1	0.26	0.0705882	0.0429412	0.10021	1.07314	0.986515	1.16737	0.0111207	244.663	Folkersen
FGF-23	rs6489536	Wald ratio	1	0.34	-0.157143	0.0957143	0.100633	0.854582	0.708402	1.03093	0.00219912	47.9495	Folkersen
VEGF-A	rs6921438	Wald ratio	1	0.48	0.0222222	0.0142222	0.11817	1.02247	0.994363	1.05137	0.101088	2446.59	Folkersen
CSF-1	rs11579145	Wald ratio	1	0.53	0.0511111	0.035	0.144203	1.05244	0.982663	1.12717	0.0161417	356.94	Folkersen
NT-pro_BNP	rs198389	Wald ratio	1	0.58	-0.0438095	0.0304762	0.150576	0.957136	0.901637	1.01605	0.0214855	477.703	Folkersen
REN	rs193280350	Wald ratio	1	0.011	0.0574713	0.0402299	0.153127	1.05915	0.978848	1.14605	0.0164686	364.291	Folkersen
ADM	rs4494298	Wald ratio	1	0.72	0.06125	0.044375	0.1675	1.06316	0.974603	1.15977	0.0103219	226.906	Folkersen
HB-EGF	rs182055959	Wald ratio	1	0.99	-0.0854167	0.0625	0.17173	0.91813	0.812275	1.03778	0.0182477	404.375	Folkersen
LOX-1	rs10505752	Wald ratio	1	0.17	0.1	0.0781818	0.200872	1.10517	0.948156	1.28819	0.00341462	74.543	Folkersen
CTSL1	rs2274611	Wald ratio	1	0.45	0.0675	0.0533333	0.205647	1.06983	0.963644	1.18772	0.007128	156.19	Folkersen
CCL3	rs1634517	Wald ratio	1	0.24	0.02325	0.0185	0.208842	1.02352	0.987074	1.06132	0.058368	1348.57	Folkersen
TIE2	rs35030851	Wald ratio	1	0.046	-0.0231707	0.0195122	0.23503	0.977096	0.940433	1.01519	0.0590152	1364.46	Folkersen
SIRT2	rs144373891	Wald ratio	1	0.012	-0.0603448	0.0534483	0.258884	0.94144	0.847806	1.04541	0.00797672	174.937	Folkersen
MMP-12	rs185686655	Wald ratio	1	0.059	-0.0666667	0.0592593	0.260589	0.935507	0.832922	1.05073	0.00809467	177.545	Folkersen
IL-18	rs5744249	Wald ratio	1	0.74	0.0359091	0.0331818	0.279167	1.03656	0.971293	1.10622	0.0186243	412.88	Folkersen
TNF-R1	rs4149584	Wald ratio	1	0.019	0.0771429	0.0714286	0.280142	1.0802	0.939078	1.24252	0.00456655	99.8057	Folkersen
HGF	rs5745687	Wald ratio	1	0.065	-0.07	0.065	0.281515	0.932394	0.820862	1.05908	0.004862	106.294	Folkersen
ECP	rs147307766	Wald ratio	1	0.05	-0.032	0.03	0.286122	0.968507	0.9132	1.02716	0.02375	529.275	Folkersen
TRAIL	rs142552223	Wald ratio	1	0.039	-0.0382979	0.0361702	0.28968	0.962426	0.896559	1.03313	0.0165582	366.306	Folkersen
Dkk-1	rs7898709	Wald ratio	1	0.89	-0.0430435	0.0434783	0.322174	0.95787	0.879624	1.04308	0.0103578	227.703	Folkersen
CD40	rs41282788	Wald ratio	1	0.023	0.0388889	0.0407407	0.339808	1.03965	0.959865	1.12608	0.0131051	288.9	Folkersen
SELE	rs4656716	Wald ratio	1	0.33	0.0572727	0.0609091	0.347064	1.05894	0.93978	1.19322	0.00535062	117.034	Folkersen
KLK6	rs268891	Wald ratio	1	0.34	0.0336842	0.0363158	0.353648	1.03426	0.963199	1.11056	0.0162017	358.289	Folkersen
hK11	rs117268623	Wald ratio	1	0.029	0.0128571	0.0142857	0.36812	1.01294	0.984971	1.0417	0.110383	2699.48	Folkersen
FS	rs31226	Wald ratio	1	0.4	-0.0438462	0.0492308	0.37313	0.957101	0.869064	1.05406	0.008112	177.928	Folkersen
MMP-1	rs471994	Wald ratio	1	0.35	0.0161111	0.0183333	0.379516	1.01624	0.980373	1.05342	0.058968	1363.3	Folkersen
IL16	rs859	Wald ratio	1	0.73	-0.0421429	0.0507143	0.405982	0.958733	0.868018	1.05893	0.00772632	169.403	Folkersen
CHI3L1	rs4950931	Wald ratio	1	0.79	0.00970149	0.011791	0.41063	1.00975	0.986681	1.03336	0.148945	3807.57	Folkersen
U-PAR	rs2302524	Wald ratio	1	0.83	0.0507143	0.0628571	0.419771	1.05202	0.930079	1.18995	0.00553112	121.004	Folkersen
IL-1ra	rs6734238	Wald ratio	1	0.59	0.0255	0.032	0.425524	1.02583	0.963464	1.09223	0.019352	429.331	Folkersen
TNF-R2	rs5746026	Wald ratio	1	0.037	-0.0342105	0.0447368	0.444447	0.966368	0.885242	1.05493	0.0102902	226.202	Folkersen
CCL20	rs4973334	Wald ratio	1	0.4	0.0563218	0.0747126	0.450942	1.05794	0.913826	1.22478	0.00363312	79.3304	Folkersen
CXCL6	rs138723628	Wald ratio	1	0.99	-0.0328358	0.0447761	0.463355	0.967697	0.886391	1.05646	0.00888822	195.106	Folkersen
CSTB	rs189861387	Wald ratio	1	0.062	0.0836364	0.136364	0.539656	1.08723	0.832238	1.42036	0.00140738	30.662	Folkersen
KIM-1	rs56084311	Wald ratio	1	0.99	0.0146154	0.0238462	0.53994	1.01472	0.968387	1.06328	0.033462	753.203	Folkersen
PSGL-1	rs11114010	Wald ratio	1	0.98	-0.00882353	0.0147059	0.548506	0.991215	0.963053	1.0202	0.113288	2779.59	Folkersen
CCL4	rs8064426	Wald ratio	1	0.13	0.0131818	0.0222727	0.55396	1.01327	0.969987	1.05848	0.0437923	996.379	Folkersen
CXCL1	rs3117604	Wald ratio	1	0.7	0.0139286	0.0246429	0.571926	1.01403	0.966213	1.06421	0.032928	740.774	Folkersen
MPO	rs34097845	Wald ratio	1	0.06	0.0211429	0.04	0.597103	1.02137	0.944351	1.10467	0.013818	304.837	Folkersen
GDF-15	rs1227734	Wald ratio	1	0.14	0.0132432	0.0256757	0.606001	1.01333	0.963598	1.06563	0.0329655	741.647	Folkersen
IL-27	rs9807908	Wald ratio	1	0.048	-0.0122727	0.0242424	0.612681	0.987802	0.941964	1.03587	0.0398104	902.024	Folkersen
SPON1	rs10832172	Wald ratio	1	0.52	-0.0134783	0.0273913	0.622674	0.986612	0.935041	1.04103	0.0264077	590.109	Folkersen
MMP-3	rs1291326	Wald ratio	1	0.91	0.0317647	0.0647059	0.623491	1.03227	0.909319	1.17186	0.00473382	103.479	Folkersen
ST2	rs4311080	Wald ratio	1	0.62	-0.0124	0.026	0.633417	0.987677	0.938606	1.03931	0.02945	660.156	Folkersen
ESM-1	rs4865884	Wald ratio	1	0.74	-0.0261538	0.0553846	0.636768	0.974185	0.873971	1.08589	0.00650312	142.408	Folkersen
FAS	rs982764	Wald ratio	1	0.69	-0.0108	0.0276	0.695572	0.989258	0.937165	1.04425	0.0267375	597.682	Folkersen
AGRP	rs142444346	Wald ratio	1	0.0049	0.0203571	0.0571429	0.721653	1.02057	0.912431	1.14152	0.0764555	1801.07	Folkersen
CASP-8	rs35550815	Wald ratio	1	0.86	-0.0173684	0.0489474	0.72271	0.982782	0.892878	1.08174	0.00869288	190.781	Folkersen
Gal-3	rs3742564	Wald ratio	1	0.61	-0.01	0.0325	0.758316	0.99005	0.92895	1.05517	0.019032	422.093	Folkersen
MMP-7	rs11568819	Wald ratio	1	0.065	0.00607143	0.0232143	0.793677	1.00609	0.961339	1.05292	0.0381181	862.161	Folkersen
MMP-10	rs17860955	Wald ratio	1	0.98	-0.00554546	0.0218182	0.799367	0.99447	0.952839	1.03792	0.047432	1083.31	Folkersen
IL-8	rs7655660	Wald ratio	1	0.057	0.0184211	0.0736842	0.802587	1.01859	0.881615	1.17685	0.00388082	84.7601	Folkersen
CTSD	rs55861089	Wald ratio	1	0.9	0.00534884	0.0255814	0.834377	1.00536	0.956198	1.05706	0.033282	749.012	Folkersen
RETN	rs34861192	Wald ratio	1	0.0072	0.00681818	0.0390909	0.861536	1.00684	0.93258	1.08702	0.0172985	382.972	Folkersen
CA-125	rs11672713	Wald ratio	1	0.71	-0.00611111	0.0411111	0.881831	0.993908	0.916962	1.07731	0.0133423	294.201	Folkersen
TM	rs1042579	Wald ratio	1	0.21	-0.0025	0.02	0.900524	0.997503	0.959157	1.03738	0.053088	1219.74	Folkersen
PTX3	rs9859018	Wald ratio	1	0.27	-0.007	0.072	0.92255	0.993024	0.862328	1.14353	0.003942	86.1016	Folkersen
TRANCE	rs4512994	Wald ratio	1	0.46	-0.005	0.0525	0.924126	0.995012	0.897717	1.10285	0.00715392	156.762	Folkersen
SCF	rs11608458	Wald ratio	1	0.65	-0.00714286	0.0957143	0.940512	0.992883	0.823046	1.19776	0.0022295	48.6134	Folkersen
TNFSF14	rs344560	Wald ratio	1	0.059	0.000634921	0.0222222	0.977206	1.00064	0.957987	1.04518	0.044071	1003.01	Folkersen
MCP-1	rs12601658	Wald ratio	1	0.23	0.0031746	0.119048	0.978726	1.00318	0.794407	1.26682	0.00140582	30.6281	Folkersen
HP	rs217181	Wald ratio	1	0.195	0.0365344	0.00845511	1.55e-05	1.03721	1.02016	1.05454	0.288132	403.945	Suhre
IGFBP3	rs2949833	Wald ratio	1	0.293	0.0654206	0.0165888	8.02e-05	1.06761	1.03345	1.10289	0.0758935	81.9621	Suhre
C4A C4B	rs2280774	Wald ratio	1	0.371	0.0514851	0.0134653	0.000131555	1.05283	1.02541	1.08099	0.119025	134.835	Suhre
CDON	rs3740909	Wald ratio	1	0.073	0.0470446	0.013269	0.000391937	1.04817	1.02126	1.07579	0.0930126	102.346	Suhre
LEPR	rs17415296	Wald ratio	1	0.193	-0.0207143	0.00607143	0.000645438	0.979499	0.967912	0.991224	0.610544	1564.55	Suhre
PCSK7	rs9326248	Wald ratio	1	0.239	0.0251762	0.00745217	0.000729147	1.0255	1.01063	1.04058	0.358683	558.173	Suhre
ENTPD5	rs17094448	Wald ratio	1	0.069	0.034354	0.0104556	0.00101724	1.03495	1.01396	1.05638	0.230351	298.695	Suhre
LYZ	rs7959452	Wald ratio	1	0.499	-0.0283159	0.009538	0.00299014	0.972081	0.954077	0.990425	0.22512	289.941	Suhre
C7	rs429017	Wald ratio	1	0.253	0.0484988	0.0163972	0.00309897	1.04969	1.01649	1.08398	0.0708675	76.1202	Suhre
FCGR3B	rs10919544	Wald ratio	1	0.376	-0.0419287	0.0142558	0.00326968	0.958938	0.932515	0.98611	0.106768	119.29	Suhre
IL15RA	rs7097780	Wald ratio	1	0.335	-0.0558824	0.0197059	0.00457081	0.94565	0.909822	0.982889	0.0515056	54.1939	Suhre
MMP12	rs17368582	Wald ratio	1	0.122	0.0362903	0.0129032	0.0049158	1.03696	1.01106	1.06352	0.118585	134.27	Suhre
PPA1	rs10823500	Wald ratio	1	0.371	-0.0448878	0.0162095	0.00561888	0.956105	0.926206	0.986968	0.0750487	80.9758	Suhre
ICAM1	rs5498	Wald ratio	1	0.432	-0.0147905	0.005341	0.00561888	0.985318	0.975058	0.995687	0.726847	2655.64	Suhre
CNTN2	rs4951168	Wald ratio	1	0.147	0.0318471	0.0121019	0.00849891	1.03236	1.00816	1.05714	0.154538	182.42	Suhre
TNFAIP6	rs289828	Wald ratio	1	0.428	0.043038	0.0164557	0.0089127	1.04398	1.01084	1.0782	0.0763948	82.5483	Suhre
CD33	rs12459419	Wald ratio	1	0.282	-0.0150044	0.00600177	0.0124193	0.985108	0.973587	0.996764	0.519832	1080.44	Suhre
WFIKKN2	rs3803884	Wald ratio	1	0.311	0.0301954	0.0122558	0.0137485	1.03066	1.00619	1.05571	0.13584	156.878	Suhre
MICB	rs3094005	Wald ratio	1	0.094	0.0257787	0.0105263	0.0143262	1.02611	1.00516	1.0475	0.147634	172.858	Suhre
FGF2	rs308403	Wald ratio	1	0.319	-0.0288136	0.0118644	0.0151584	0.971598	0.949265	0.994456	0.151242	177.835	Suhre
EPHB2	rs6687487	Wald ratio	1	0.086	0.0548204	0.0226843	0.0156634	1.05635	1.01041	1.10438	0.0439932	45.9257	Suhre
RELT	rs7119167	Wald ratio	1	0.198	0.0445545	0.0188119	0.0178642	1.04556	1.00771	1.08483	0.0518361	54.5606	Suhre
CFH	rs10737680	Wald ratio	1	0.417	-0.0301811	0.0128773	0.019091	0.97027	0.946087	0.995071	0.120101	136.221	Suhre
IL6R	rs4129267	Wald ratio	1	0.381	0.0124172	0.00538079	0.0210163	1.01249	1.00187	1.02323	0.688303	2203.82	Suhre
CPNE1	rs2425143	Wald ratio	1	0.105	0.0207297	0.00912106	0.0230426	1.02095	1.00286	1.03936	0.273361	375.447	Suhre
CAPN1 CAPNS1	rs10895987	Wald ratio	1	0.226	0.037037	0.0163399	0.0234106	1.03773	1.00502	1.0715	0.0737063	79.4121	Suhre
CA13	rs17741049	Wald ratio	1	0.068	-0.0389785	0.0174731	0.0256964	0.961771	0.929391	0.99528	0.0701618	75.305	Suhre
ERAP1	rs26496	Wald ratio	1	0.204	0.0150442	0.00699115	0.0314053	1.01516	1.00134	1.02916	0.414696	707.098	Suhre
ACP1	rs11553746	Wald ratio	1	0.325	0.0113177	0.00533549	0.033904	1.01138	1.00086	1.02201	0.671362	2038.77	Suhre
FCGR2A FCGR2B	rs17413015	Wald ratio	1	0.147	0.0132256	0.00624541	0.034205	1.01331	1.00099	1.02579	0.464529	865.779	Suhre
CTSB	rs3947	Wald ratio	1	0.275	0.0291262	0.0139806	0.0372208	1.02955	1.00173	1.05816	0.105758	118.03	Suhre
CASP3	rs870825	Wald ratio	1	0.157	-0.0505051	0.0244949	0.0392215	0.950749	0.906182	0.997508	0.0415095	43.2206	Suhre
ARSB	rs672413	Wald ratio	1	0.347	-0.0379404	0.0186992	0.0424598	0.96277	0.928123	0.998711	0.0617057	65.6322	Suhre
GP6	rs1654439	Wald ratio	1	0.17	-0.0258752	0.013242	0.0506985	0.974457	0.949491	1.00008	0.121811	138.43	Suhre
IL1RAP	rs1024948	Wald ratio	1	0.133	-0.012574	0.00665681	0.0589067	0.987505	0.974704	1.00047	0.421555	727.315	Suhre
SIGLEC9	rs2691273	Wald ratio	1	0.463	0.0157068	0.00837696	0.0607927	1.01583	0.999288	1.03265	0.29025	408.129	Suhre
MICA	rs2844511	Wald ratio	1	0.397	0.0130152	0.00694143	0.0607927	1.0131	0.99941	1.02698	0.407005	684.982	Suhre
PDGFRB	rs3776081	Wald ratio	1	0.319	0.0135276	0.00728408	0.0632908	1.01362	0.999251	1.02819	0.40125	668.805	Suhre
CCL17	rs9302690	Wald ratio	1	0.084	-0.0354267	0.0193237	0.066753	0.965193	0.929321	1.00245	0.0593455	62.9634	Suhre
EMR2	rs7260110	Wald ratio	1	0.36	0.043771	0.0239057	0.0671026	1.04474	0.996921	1.09486	0.0406467	42.2841	Suhre
TGFBI	rs3792900	Wald ratio	1	0.473	0.0244989	0.0140312	0.0808054	1.0248	0.997002	1.05338	0.100507	111.513	Suhre
CAT	rs2284367	Wald ratio	1	0.22	0.0254403	0.0148728	0.0871686	1.02577	0.996297	1.05611	0.0896167	98.2416	Suhre
GPC5	rs342706	Wald ratio	1	0.274	-0.0139373	0.00824622	0.091001	0.986159	0.970349	1.00223	0.294933	417.468	Suhre
ICAM5	rs1051738	Wald ratio	1	0.172	-0.0342298	0.0202934	0.091652	0.966349	0.928667	1.00556	0.047647	49.9307	Suhre
IGF2R	rs600324	Wald ratio	1	0.103	0.0162933	0.00977597	0.0955807	1.01643	0.997136	1.03609	0.17819	216.392	Suhre
EDAR	rs6750059	Wald ratio	1	0.249	0.0272727	0.0165909	0.10021	1.02765	0.994768	1.06161	0.072406	77.9018	Suhre
RARRES2	rs9640161	Wald ratio	1	0.371	0.0317003	0.0193084	0.100633	1.03221	0.993875	1.07202	0.056197	59.4241	Suhre
TNC	rs45602433	Wald ratio	1	0.148	0.0133333	0.00819048	0.103545	1.01342	0.997284	1.02982	0.278042	384.351	Suhre
TLR4 LY96	rs4986791	Wald ratio	1	0.068	0.0165485	0.0102443	0.106227	1.01669	0.996476	1.03731	0.204116	255.952	Suhre
MIA	rs1455434	Wald ratio	1	0.045	-0.0216022	0.0135014	0.109599	0.978629	0.953072	1.00487	0.10609	118.443	Suhre
NAAA	rs4859571	Wald ratio	1	0.24	-0.0170213	0.0106383	0.109599	0.983123	0.962836	1.00384	0.181315	221.028	Suhre
PPID	rs8396	Wald ratio	1	0.286	-0.0219561	0.0137725	0.110891	0.978283	0.952229	1.00505	0.102511	113.991	Suhre
IGFBP7	rs2412776	Wald ratio	1	0.192	0.027088	0.0173815	0.119129	1.02746	0.993045	1.06306	0.0608906	64.709	Suhre
FCN1	rs10858300	Wald ratio	1	0.251	-0.0268949	0.0173594	0.121311	0.973464	0.940899	1.00716	0.0628973	66.9847	Suhre
FN1	rs1250258	Wald ratio	1	0.255	0.0154712	0.00998593	0.121311	1.01559	0.995907	1.03566	0.192073	237.26	Suhre
IL16	rs11072996	Wald ratio	1	0.072	0.0372439	0.0242086	0.123936	1.03795	0.989847	1.08838	0.0385353	39.9997	Suhre
SIGLEC6	rs2124910	Wald ratio	1	0.407	-0.0148545	0.00980092	0.129614	0.985255	0.966509	1.00436	0.205828	258.655	Suhre
CNTN5	rs1461672	Wald ratio	1	0.061	-0.0245232	0.0163488	0.133614	0.975775	0.945003	1.00755	0.0617188	65.647	Suhre
ANG	rs17114671	Wald ratio	1	0.119	-0.0186104	0.0124069	0.133614	0.981562	0.95798	1.00572	0.136214	157.379	Suhre
IL18RAP	rs6543140	Wald ratio	1	0.301	0.0206186	0.0138144	0.135558	1.02083	0.993563	1.04885	0.0989822	109.636	Suhre
SERPINA4	rs882732	Wald ratio	1	0.247	-0.0164918	0.0110945	0.13715	0.983643	0.962485	1.00527	0.165491	197.912	Suhre
CD109	rs10455097	Wald ratio	1	0.493	0.0157546	0.0106136	0.137709	1.01588	0.994965	1.03723	0.181769	221.704	Suhre
AFM	rs41265665	Wald ratio	1	0.032	0.037123	0.025522	0.145795	1.03782	0.987183	1.09106	0.0460331	48.1578	Suhre
IL17RB	rs4453827	Wald ratio	1	0.238	0.033033	0.0228228	0.147794	1.03358	0.988368	1.08087	0.0402208	41.8225	Suhre
CCL4L1	rs3213636	Wald ratio	1	0.189	0.0286344	0.0198238	0.148614	1.02905	0.989832	1.06982	0.0631865	67.3134	Suhre
SCARF1	rs8071756	Wald ratio	1	0.224	0.0186441	0.0133898	0.1638	1.01882	0.992429	1.04591	0.121016	137.402	Suhre
PI3	rs6032067	Wald ratio	1	0.175	-0.0272953	0.0203474	0.17977	0.973074	0.93503	1.01267	0.0468956	49.1046	Suhre
SPARCL1	rs4693167	Wald ratio	1	0.366	0.0129412	0.00970588	0.182422	1.01303	0.993936	1.03248	0.214594	272.681	Suhre
MAPKAPK2	rs6669284	Wald ratio	1	0.349	0.0276074	0.0208589	0.185659	1.02799	0.986812	1.07089	0.0482916	50.6405	Suhre
CCL15	rs7221769	Wald ratio	1	0.072	0.0111842	0.00855263	0.190978	1.01125	0.994437	1.02834	0.308743	445.747	Suhre
KLK12	rs8103941	Wald ratio	1	0.245	-0.0132612	0.0101488	0.191326	0.986826	0.967391	1.00665	0.202037	252.685	Suhre
MST1	rs9858542	Wald ratio	1	0.278	-0.00692841	0.00538876	0.198543	0.993096	0.982662	1.00364	0.677377	2095.39	Suhre
APCS	rs12079353	Wald ratio	1	0.021	-0.0288018	0.0230415	0.2113	0.971609	0.928706	1.01649	0.0309793	31.9057	Suhre
NCR3	rs6916921	Wald ratio	1	0.133	-0.0242326	0.0193861	0.2113	0.976059	0.939667	1.01386	0.0883654	96.7368	Suhre
SEMA3E	rs17284969	Wald ratio	1	0.122	0.011194	0.00895522	0.2113	1.01126	0.993662	1.02916	0.246192	325.945	Suhre
PDCD1LG2	rs16923189	Wald ratio	1	0.28	0.0164122	0.0133588	0.219233	1.01655	0.990277	1.04352	0.110709	124.242	Suhre
AHSG	rs2518136	Wald ratio	1	0.458	-0.0138489	0.0113309	0.221624	0.986247	0.964585	1.00839	0.153477	180.941	Suhre
KNG1	rs2304456	Wald ratio	1	0.103	0.00878477	0.00732064	0.230139	1.00882	0.994452	1.0234	0.344795	525.188	Suhre
TEK	rs35030851	Wald ratio	1	0.051	0.0205628	0.017316	0.23503	1.02078	0.986712	1.05601	0.0826438	89.9089	Suhre
PPP3CA PPP3R1	rs17266357	Wald ratio	1	0.31	-0.0217391	0.0184783	0.239407	0.978495	0.943691	1.01458	0.0579344	61.3742	Suhre
CPB2	rs3742264	Wald ratio	1	0.321	-0.00918728	0.00789164	0.244351	0.990855	0.975647	1.0063	0.31421	457.256	Suhre
SERPINA1	rs2749534	Wald ratio	1	0.201	-0.0199063	0.0173302	0.250701	0.98029	0.947552	1.01416	0.0585637	62.0824	Suhre
ADAMTS5	rs2830585	Wald ratio	1	0.158	0.00931966	0.00820131	0.255804	1.00936	0.993268	1.02572	0.306336	440.738	Suhre
IL18R1	rs2058622	Wald ratio	1	0.227	-0.00854271	0.00763819	0.263387	0.991494	0.976761	1.00645	0.347441	531.364	Suhre
CD209	rs8106657	Wald ratio	1	0.257	0.0226519	0.020442	0.267815	1.02291	0.982736	1.06473	0.050046	52.5771	Suhre
CST3	rs6036478	Wald ratio	1	0.205	0.0217391	0.0196931	0.269638	1.02198	0.983282	1.0622	0.0498316	52.3401	Suhre
GFRA2	rs4443656	Wald ratio	1	0.419	-0.0173697	0.0158809	0.274065	0.98278	0.952661	1.01385	0.0790734	85.6911	Suhre
CFI	rs7439493	Wald ratio	1	0.402	0.0197222	0.0180556	0.274698	1.01992	0.984455	1.05666	0.0623106	66.3184	Suhre
THBS2	rs3763267	Wald ratio	1	0.106	-0.0197694	0.0181219	0.275313	0.980425	0.946212	1.01587	0.0698314	74.9238	Suhre
ESAM	rs11219769	Wald ratio	1	0.253	0.0232836	0.021791	0.285298	1.02356	0.980761	1.06822	0.042419	44.2095	Suhre
CCL7	rs3138036	Wald ratio	1	0.145	-0.0094	0.0088	0.285439	0.990644	0.973704	1.00788	0.24795	329.039	Suhre
SMPDL3A	rs28385609	Wald ratio	1	0.144	-0.0180451	0.0171053	0.29145	0.982117	0.949736	1.0156	0.0697733	74.8568	Suhre
DAPK2	rs922182	Wald ratio	1	0.447	0.0175066	0.0167109	0.294814	1.01766	0.984869	1.05154	0.070266	75.4253	Suhre
CCL18	rs9904601	Wald ratio	1	0.117	-0.0127462	0.0127462	0.317311	0.987335	0.962974	1.01231	0.153886	181.51	Suhre
SLAMF7	rs489286	Wald ratio	1	0.346	0.00969609	0.00969609	0.317311	1.00974	0.990735	1.02912	0.216093	275.11	Suhre
ECM1	rs13294	Wald ratio	1	0.398	-0.00753828	0.00753828	0.317311	0.99249	0.977934	1.00726	0.345402	526.6	Suhre
IL17RD	rs1463657	Wald ratio	1	0.334	0.010859	0.0111831	0.331541	1.01092	0.989001	1.03332	0.169364	203.489	Suhre
PDE5A	rs4834770	Wald ratio	1	0.434	-0.0194268	0.0203822	0.340527	0.980761	0.942353	1.02073	0.048439	50.803	Suhre
FRZB	rs288326	Wald ratio	1	0.131	0.0136103	0.0143266	0.342112	1.0137	0.985634	1.04257	0.110926	124.516	Suhre
FCRL3	rs7522061	Wald ratio	1	0.433	0.00872781	0.00931953	0.349012	1.00877	0.990507	1.02736	0.224385	288.721	Suhre
CTSS	rs41271951	Wald ratio	1	0.089	-0.011399	0.0124352	0.359317	0.988666	0.96486	1.01306	0.151006	177.508	Suhre
SERPING1	rs11603020	Wald ratio	1	0.277	-0.00694444	0.00758547	0.359933	0.99308	0.978424	1.00795	0.350913	539.545	Suhre
SELP	rs6136	Wald ratio	1	0.1	0.0113281	0.0130208	0.3843	1.01139	0.985908	1.03754	0.106168	118.541	Suhre
IL17RA	rs3827278	Wald ratio	1	0.232	0.00676923	0.00779487	0.385164	1.00679	0.991527	1.02229	0.338757	511.279	Suhre
CFB	rs4151669	Wald ratio	1	0.041	0.0111111	0.0128205	0.386125	1.01117	0.986081	1.0369	0.107648	120.392	Suhre
SERPINA3	rs6575449	Wald ratio	1	0.186	-0.0164352	0.019213	0.392318	0.983699	0.947344	1.02145	0.0565112	59.7762	Suhre
KLKB1	rs1511802	Wald ratio	1	0.37	0.0115546	0.0136555	0.397467	1.01162	0.984905	1.03906	0.10563	117.869	Suhre
ANXA2	rs36032232	Wald ratio	1	0.15	0.00814433	0.00969072	0.40067	1.00818	0.989209	1.02751	0.239929	315.036	Suhre
PLG	rs783150	Wald ratio	1	0.114	-0.0158607	0.0189555	0.402742	0.984264	0.948367	1.02152	0.0539945	56.9622	Suhre
ASAH2	rs2842126	Wald ratio	1	0.23	0.0109817	0.0133111	0.409372	1.01104	0.985005	1.03777	0.127937	146.413	Suhre
COLEC11	rs7588285	Wald ratio	1	0.205	-0.00987125	0.0120172	0.411402	0.990177	0.967128	1.01378	0.159259	189.049	Suhre
SELL	rs12938	Wald ratio	1	0.276	-0.011499	0.0143737	0.423711	0.988567	0.961105	1.01681	0.0947841	104.499	Suhre
KDR	rs34231037	Wald ratio	1	0.029	-0.0128755	0.016309	0.429835	0.987207	0.956149	1.01927	0.0764362	82.5967	Suhre
CCL16	rs33995560	Wald ratio	1	0.082	-0.00710696	0.00933238	0.446336	0.992918	0.974921	1.01125	0.292138	411.88	Suhre
GPNMB	rs858267	Inverse variance weighted	2	0.023	-0.0104639	0.0137687	0.447269	0.989591	0.963242	1.01666	0.0479571	50.2721	Suhre
GPNMB	rs5850	Inverse variance weighted	2	0.393	-0.0104639	0.0137687	0.447269	0.989591	0.963242	1.01666	0.054184	57.1735	Suhre
CCL23	rs1003645	Wald ratio	1	0.217	-0.0133475	0.0175847	0.447831	0.986741	0.953312	1.02134	0.0757069	81.7441	Suhre
SIGLEC14	rs7250849	Wald ratio	1	0.121	-0.00609756	0.00813008	0.453255	0.993921	0.978208	1.00989	0.321821	473.588	Suhre
BST1	rs2302465	Wald ratio	1	0.126	-0.00527926	0.00726855	0.467645	0.994735	0.980664	1.00901	0.376238	601.97	Suhre
FCER2	rs11260013	Wald ratio	1	0.487	0.0140244	0.0195122	0.472295	1.01412	0.976071	1.05366	0.0537556	56.6958	Suhre
F7	rs776905	Wald ratio	1	0.113	0.00697464	0.00996377	0.483927	1.007	0.987524	1.02686	0.244326	322.676	Suhre
PLA2G2A	rs17354650	Wald ratio	1	0.281	0.013764	0.0199438	0.490106	1.01386	0.974992	1.05428	0.0512112	53.8674	Suhre
LILRB1	rs2004318	Wald ratio	1	0.05	0.00614869	0.00894354	0.491768	1.00617	0.988684	1.02396	0.304049	436.01	Suhre
KLRK1	rs2255336	Wald ratio	1	0.218	0.0137845	0.0203008	0.49713	1.01388	0.97433	1.05503	0.0542799	57.2805	Suhre
ESD	rs947409	Wald ratio	1	0.099	0.00678605	0.0103676	0.51276	1.00681	0.986557	1.02748	0.200826	250.79	Suhre
CXCL11	rs4356932	Wald ratio	1	0.446	0.012462	0.0194529	0.521766	1.01254	0.974661	1.05189	0.0534892	56.399	Suhre
CCL25	rs3848570	Wald ratio	1	0.052	-0.0104689	0.0163577	0.522173	0.989586	0.958362	1.02183	0.0829049	90.2187	Suhre
CD55	rs12134133	Wald ratio	1	0.285	-0.00837887	0.0131148	0.522895	0.991656	0.966491	1.01748	0.122836	139.758	Suhre
SPINT2	rs8112211	Wald ratio	1	0.255	0.00475185	0.00770855	0.537605	1.00476	0.989697	1.02006	0.340743	515.824	Suhre
MFGE8	rs3743392	Wald ratio	1	0.321	-0.0136508	0.0222222	0.539027	0.986442	0.944399	1.03036	0.043254	45.119	Suhre
CCL3L1	rs16971895	Wald ratio	1	0.042	-0.0141753	0.0231959	0.541126	0.985925	0.942104	1.03178	0.0484583	50.8242	Suhre
CA6	rs6697763	Wald ratio	1	0.34	-0.00789474	0.0129699	0.542726	0.992136	0.967233	1.01768	0.127021	145.212	Suhre
GNLY	rs12151621	Wald ratio	1	0.212	0.00498891	0.00842572	0.55378	1.005	0.988541	1.02174	0.271835	372.568	Suhre
KIR2DL4	rs618835	Wald ratio	1	0.362	0.0091195	0.0157233	0.561915	1.00916	0.978536	1.04075	0.186842	229.313	Suhre
CXCL1	rs3117600	Wald ratio	1	0.297	-0.00394867	0.00681145	0.56211	0.996059	0.98285	1.00945	0.42851	748.311	Suhre
TIMP3	rs2097326	Wald ratio	1	0.279	-0.00429646	0.00762621	0.573176	0.995713	0.98094	1.01071	0.348714	534.352	Suhre
CFHR5	rs6003	Wald ratio	1	0.095	0.0104811	0.0189003	0.579206	1.01054	0.973786	1.04867	0.0582436	61.722	Suhre
FUT3	rs778986	Wald ratio	1	0.204	0.00483871	0.00913978	0.59652	1.00485	0.98701	1.02301	0.280892	389.83	Suhre
CNDP1	rs17817077	Wald ratio	1	0.406	-0.00971429	0.0185714	0.600921	0.990333	0.954933	1.02704	0.0590852	62.6699	Suhre
SPON1	rs10832169	Wald ratio	1	0.499	0.00886427	0.0174515	0.611498	1.0089	0.974978	1.04401	0.0651602	69.5626	Suhre
NAGK	rs6714900	Wald ratio	1	0.332	-0.00660194	0.0132039	0.617075	0.99342	0.96804	1.01946	0.117641	133.059	Suhre
C1R	rs12146727	Wald ratio	1	0.132	-0.00589744	0.0119231	0.620866	0.99412	0.971157	1.01763	0.139416	161.678	Suhre
LILRB2	rs103294	Wald ratio	1	0.189	-0.00402969	0.00837752	0.630508	0.995978	0.979758	1.01247	0.272606	374.022	Suhre
PDK1	rs12052479	Wald ratio	1	0.211	-0.00629371	0.0131119	0.631227	0.993726	0.968513	1.0196	0.108939	122.013	Suhre
TDGF1	rs3806701	Wald ratio	1	0.274	0.00307414	0.00650995	0.636768	1.00308	0.990361	1.01596	0.486662	946.138	Suhre
DKK3	rs11022119	Wald ratio	1	0.28	-0.01	0.0212121	0.637335	0.99005	0.949732	1.03208	0.0439085	45.8331	Suhre
SAA1	rs1993373	Wald ratio	1	0.341	-0.00338059	0.00774264	0.662387	0.996625	0.981615	1.01186	0.377927	606.315	Suhre
IL6ST	rs7730934	Wald ratio	1	0.108	-0.00748663	0.0174688	0.668235	0.992541	0.959133	1.02711	0.0606379	64.4231	Suhre
KLK7	rs2659067	Wald ratio	1	0.09	0.00769231	0.0183946	0.675814	1.00772	0.972037	1.04472	0.0585755	62.0957	Suhre
CST5	rs6138152	Wald ratio	1	0.196	-0.00445683	0.0107242	0.677714	0.995553	0.974845	1.0167	0.162477	193.609	Suhre
DPT	rs494189	Wald ratio	1	0.247	0.00816901	0.02	0.682943	1.0082	0.969446	1.04851	0.046879	49.0864	Suhre
CST2	rs7263120	Wald ratio	1	0.111	-0.00676157	0.0177936	0.703945	0.993261	0.959218	1.02851	0.0623343	66.3453	Suhre
F11	rs2289252	Wald ratio	1	0.413	-0.00542986	0.0147059	0.711956	0.994585	0.966327	1.02367	0.0947246	104.427	Suhre
CGA CGB	rs753307	Wald ratio	1	0.482	-0.00898437	0.025	0.719315	0.991056	0.943665	1.04083	0.0327255	33.7651	Suhre
CST7	rs6138458	Wald ratio	1	0.227	-0.00353866	0.00996068	0.722392	0.996468	0.977202	1.01611	0.204308	256.253	Suhre
LY9	rs540254	Wald ratio	1	0.353	-0.00551559	0.0160671	0.731385	0.9945	0.963669	1.02632	0.0794294	86.1102	Suhre
IL12RB1	rs376008	Wald ratio	1	0.335	-0.00303831	0.00898283	0.735186	0.996966	0.979567	1.01467	0.255322	342.177	Suhre
CHIT1	rs12141375	Wald ratio	1	0.204	-0.00272727	0.00808081	0.73574	0.997276	0.981606	1.0132	0.318305	465.998	Suhre
CXCL6	rs16850073	Wald ratio	1	0.377	-0.00247748	0.00743243	0.738883	0.997526	0.983099	1.01216	0.370412	587.164	Suhre
AKR1A1	rs6662572	Wald ratio	1	0.264	0.00736196	0.0226994	0.745693	1.00739	0.963552	1.05322	0.0412997	42.9927	Suhre
HAVCR2	rs4704846	Wald ratio	1	0.191	0.00378457	0.0120815	0.754088	1.00379	0.980301	1.02784	0.145856	170.422	Suhre
F5	rs6033	Wald ratio	1	0.079	0.00473373	0.0153846	0.758316	1.00474	0.9749	1.0355	0.103903	115.719	Suhre
CXCL10	rs11548618	Wald ratio	1	0.012	0.0065182	0.0222705	0.769765	1.00654	0.963549	1.05145	0.0803666	87.2151	Suhre
CCL5	rs4239252	Wald ratio	1	0.211	0.0066474	0.0239884	0.781697	1.00667	0.960434	1.05513	0.0398604	41.4322	Suhre
MMP7	rs11568819	Wald ratio	1	0.067	-0.00508982	0.0194611	0.793677	0.994923	0.957688	1.03361	0.0557878	58.9658	Suhre
IL5RA	rs2290610	Wald ratio	1	0.364	-0.00306749	0.0130879	0.814694	0.996937	0.971689	1.02284	0.110715	124.25	Suhre
RET	rs2505535	Wald ratio	1	0.272	-0.00348028	0.0167053	0.834969	0.996526	0.964425	1.02969	0.0735673	79.2504	Suhre
AGRP	rs7184253	Wald ratio	1	0.052	-0.00401949	0.0194884	0.836596	0.995989	0.958662	1.03477	0.0664551	71.0433	Suhre
IL1RL1	rs12712135	Wald ratio	1	0.46	0.00175439	0.00921053	0.848936	1.00176	0.983834	1.02	0.232431	302.209	Suhre
HRG	rs2228243	Wald ratio	1	0.208	-0.00148957	0.00804369	0.853084	0.998512	0.982893	1.01438	0.334101	500.725	Suhre
C8A C8B C8G	rs1013579	Wald ratio	1	0.042	-0.00440806	0.0239295	0.853848	0.995602	0.949984	1.04341	0.0507324	53.3369	Suhre
IL23R	rs11209026	Wald ratio	1	0.062	0.00283019	0.0175202	0.871669	1.00283	0.968982	1.03787	0.0640372	68.2817	Suhre
AGT	rs2493151	Wald ratio	1	0.235	-0.00358209	0.0223881	0.872881	0.996424	0.953646	1.04112	0.0403505	41.963	Suhre
LGALS3	rs35070799	Wald ratio	1	0.08	-0.00269841	0.0174603	0.87718	0.997305	0.963753	1.03203	0.0584237	61.9247	Suhre
IL7R	rs11957503	Wald ratio	1	0.437	-0.00211765	0.0152941	0.889876	0.997885	0.968415	1.02825	0.0888787	97.3536	Suhre
HGFAC	rs1203119	Wald ratio	1	0.082	0.00172589	0.013198	0.895958	1.00173	0.976147	1.02798	0.146069	170.713	Suhre
CCL14	rs41341749	Wald ratio	1	0.061	-0.00153715	0.0128096	0.904483	0.998464	0.973708	1.02385	0.157087	185.989	Suhre
APOB	rs520354	Wald ratio	1	0.473	-0.00231023	0.0207921	0.911528	0.997692	0.957851	1.03919	0.0457706	47.8701	Suhre
EPHA1	rs4725617	Wald ratio	1	0.089	-0.000902256	0.00902256	0.920344	0.999098	0.981585	1.01692	0.286841	401.408	Suhre
TPSB2	rs4984778	Wald ratio	1	0.285	0.00135396	0.0141199	0.923608	1.00135	0.974022	1.02945	0.108934	122.006	Suhre
KYNU	rs9013	Wald ratio	1	0.158	0.00076555	0.00803828	0.924126	1.00077	0.985122	1.01666	0.290557	408.738	Suhre
PLXNC1	rs2361355	Wald ratio	1	0.406	-0.0012931	0.0140086	0.926454	0.998708	0.971659	1.02651	0.103843	115.645	Suhre
IL1RL2	rs1922291	Wald ratio	1	0.398	0.00146628	0.0190616	0.938685	1.00147	0.964742	1.03959	0.0557209	58.8909	Suhre
MBL2	rs10824796	Wald ratio	1	0.223	-0.000421496	0.0081138	0.95857	0.999579	0.983808	1.0156	0.312096	452.784	Suhre
PPIE	rs9787249	Wald ratio	1	0.377	-0.000217391	0.0141304	0.987725	0.999783	0.972473	1.02786	0.0993974	110.147	Suhre
CST1	rs6114248	Wald ratio	1	0.315	0.000177305	0.0120567	0.988267	1.00018	0.976819	1.02409	0.137274	158.799	Suhre
MANSC4	rs36138811	Wald ratio	1	0.231771	-0.103627	0.0119328	3.81e-18	0.901562	0.88072	0.922896	0.144452	557.006	Sun
ABO	rs505922	Wald ratio	1	0.313178	0.0354501	0.00516338	6.62e-12	1.03609	1.02565	1.04662	0.724348	8668.98	Sun
PAM	rs257309	Wald ratio	1	0.351714	-0.0857633	0.0143654	2.37e-09	0.917811	0.89233	0.944021	0.0991981	363.292	Sun
MANBA	rs227370	Wald ratio	1	0.674618	-0.0607577	0.0119728	3.88e-07	0.941051	0.919225	0.963396	0.137479	525.835	Sun
HP	rs217184	Wald ratio	1	0.195652	-0.0414365	0.00943831	1.13e-05	0.95941	0.941825	0.977324	0.237573	1027.97	Sun
ATP1B2	rs1642762	Wald ratio	1	0.586879	0.0971885	0.0222145	1.21e-05	1.10207	1.05511	1.15111	0.0402478	138.346	Sun
SPATA20	rs9890200	Wald ratio	1	0.375996	0.110585	0.0260664	2.21e-05	1.11693	1.0613	1.17548	0.0300835	102.324	Sun
MRC2	rs146385050	Wald ratio	1	0.195049	-0.164534	0.0393053	2.84e-05	0.848289	0.785392	0.916223	0.0150327	50.3499	Sun
DUSP13	rs6480771	Wald ratio	1	0.415141	-0.0868403	0.0213761	4.85e-05	0.916823	0.879205	0.956052	0.0435292	150.138	Sun
PLXNB2	rs28573806	Wald ratio	1	0.399591	-0.0507996	0.0126058	5.58e-05	0.950469	0.927273	0.974245	0.13555	517.299	Sun
ERO1LB	rs1254194	Wald ratio	1	0.595759	0.0680272	0.0170068	6.33e-05	1.07039	1.0353	1.10668	0.0703594	249.683	Sun
KIAA1161	rs10972076	Wald ratio	1	0.624659	-0.0843608	0.0210902	6.33e-05	0.9191	0.881881	0.957888	0.0445414	153.792	Sun
CCNH	rs2230641	Wald ratio	1	0.205375	-0.125733	0.0322716	9.78e-05	0.88185	0.827798	0.939431	0.0185815	62.461	Sun
NELL1	rs61652119	Wald ratio	1	0.048674	0.0486574	0.0126149	0.00011472	1.04986	1.02422	1.07614	0.114063	424.742	Sun
NID2	rs1151582	Wald ratio	1	0.456621	-0.0659564	0.0172501	0.000131555	0.936172	0.905049	0.968365	0.077112	275.648	Sun
TNFRSF11A	rs884205	Wald ratio	1	0.756399	-0.120805	0.0326622	0.000216766	0.886206	0.831251	0.944795	0.0184084	61.8681	Sun
HPGDS	rs1965049	Wald ratio	1	0.620956	0.0523203	0.0147862	0.000402466	1.05371	1.02361	1.0847	0.0909695	330.141	Sun
LEPR	rs3790438	Wald ratio	1	0.175255	0.0218261	0.00625682	0.000485971	1.02207	1.00961	1.03468	0.546147	3969.87	Sun
IL27	rs181209	Wald ratio	1	0.326977	-0.127142	0.0375898	0.000718677	0.880609	0.818061	0.947938	0.014403	48.21	Sun
ENTPD5	rs57731447	Wald ratio	1	0.05877	-0.048614	0.0144808	0.000787524	0.952549	0.925893	0.979972	0.103408	380.489	Sun
FCGR3B	rs10919543	Wald ratio	1	0.324432	0.0482426	0.0158511	0.0023386	1.04943	1.01732	1.08254	0.0830616	298.842	Sun
NEO1	rs12903656	Wald ratio	1	0.10075	-0.115344	0.0384481	0.0026998	0.891059	0.826378	0.960803	0.0148317	49.6664	Sun
GSTA1	rs2290758	Wald ratio	1	0.570024	0.045706	0.0153957	0.00299014	1.04677	1.01565	1.07883	0.0847086	305.317	Sun
LAMC1	rs4129858	Wald ratio	1	0.430876	-0.0646919	0.0217909	0.00299014	0.937356	0.898164	0.978258	0.0423055	145.731	Sun
MMP12	rs28381684	Wald ratio	1	0.124644	-0.0359481	0.0121967	0.00320491	0.96469	0.941902	0.98803	0.132388	503.392	Sun
CBR3	rs1028997	Wald ratio	1	0.375555	0.0248691	0.00876963	0.00457081	1.02518	1.00771	1.04295	0.273769	1243.63	Sun
EGF	rs11568972	Wald ratio	1	0.336807	0.0715901	0.0252449	0.00457081	1.07421	1.02236	1.1287	0.0314668	107.182	Sun
IL15RA	rs8177641	Wald ratio	1	0.317813	0.0373208	0.0133569	0.00520415	1.03803	1.0112	1.06556	0.112386	417.705	Sun
CTRB1	rs8051363	Wald ratio	1	0.704343	0.0309071	0.0111266	0.0054732	1.03139	1.00914	1.05413	0.174399	696.879	Sun
ICAM1	rs5498	Wald ratio	1	0.430506	0.015015	0.00542209	0.00561888	1.01513	1.0044	1.02597	0.70468	7871.93	Sun
CBLN4	rs74447607	Wald ratio	1	0.191752	0.101056	0.0372072	0.00660661	1.10634	1.02853	1.19003	0.0146903	49.1859	Sun
CNTN2	rs2071533	Wald ratio	1	0.865176	-0.0337443	0.0124594	0.00676221	0.966819	0.943494	0.99072	0.138499	530.363	Sun
RSPO3	rs2489623	Wald ratio	1	0.534679	-0.062963	0.0233333	0.0069671	0.938978	0.897003	0.982918	0.0362747	124.174	Sun
MICB	rs3134900	Wald ratio	1	0.139547	-0.0365425	0.0136332	0.00735315	0.964117	0.938696	0.990227	0.12157	456.565	Sun
LYZ	rs4761234	Wald ratio	1	0.473084	0.0359029	0.0135164	0.0079015	1.03656	1.00946	1.06438	0.111776	415.154	Sun
WFIKKN2	rs7225465	Wald ratio	1	0.68203	-0.0275524	0.0104087	0.00811952	0.972824	0.953178	0.992874	0.185116	749.431	Sun
DLK1	rs12881760	Wald ratio	1	0.676353	-0.0336072	0.012696	0.00811952	0.966951	0.943186	0.991315	0.12559	473.831	Sun
GDF15	rs45543339	Wald ratio	1	0.258636	0.0347524	0.0132059	0.00849891	1.03536	1.00891	1.06251	0.127011	479.971	Sun
TNFAIP6	rs289828	Wald ratio	1	0.62173	-0.0310276	0.0118635	0.0089127	0.969449	0.947167	0.992255	0.141201	542.409	Sun
SVEP1	rs61751937	Wald ratio	1	0.030029	0.0413363	0.0160283	0.00991019	1.0422	1.00997	1.07546	0.0818577	294.125	Sun
PTN	rs1431093	Wald ratio	1	0.419185	-0.0728597	0.0286885	0.0110953	0.929731	0.878896	0.983507	0.0234822	79.3305	Sun
RET	rs2795507	Wald ratio	1	0.796047	0.0722543	0.0285405	0.0113529	1.07493	1.01645	1.13677	0.0248789	84.1695	Sun
IFNAR1	rs2257167	Wald ratio	1	0.13427	0.0828443	0.0327925	0.0115266	1.08637	1.01874	1.15849	0.0195114	65.649	Sun
CD33	rs12459419	Wald ratio	1	0.329168	0.0180161	0.00720644	0.0124193	1.01818	1.0039	1.03266	0.393221	2137.91	Sun
CCDC126	rs227934	Wald ratio	1	0.47897	0.058203	0.0232812	0.0124193	1.05993	1.01265	1.10942	0.0377182	129.31	Sun
GNRH2	rs3787480	Wald ratio	1	0.148627	-0.0915522	0.0366209	0.0124193	0.912514	0.849312	0.980419	0.0146135	48.925	Sun
C1QTNF5	rs2248863	Wald ratio	1	0.141788	-0.0705305	0.0288255	0.0144127	0.931899	0.880709	0.986065	0.0258801	87.6467	Sun
EPHB2	rs6687487	Wald ratio	1	0.080316	-0.0473701	0.0196014	0.0156634	0.953734	0.917788	0.991089	0.0553678	193.365	Sun
KDELC2	rs74911261	Wald ratio	1	0.026545	0.0380633	0.0159866	0.0172679	1.0388	1.00675	1.07186	0.0891774	323.001	Sun
CPZ	rs2631738	Wald ratio	1	0.519366	-0.0769625	0.0323243	0.0172679	0.925925	0.869082	0.986485	0.0189645	63.7734	Sun
APOA5	rs964184	Wald ratio	1	0.868979	-0.0838095	0.0354286	0.0180013	0.919606	0.857916	0.985733	0.0156906	52.5883	Sun
GPX7	rs1097234	Wald ratio	1	0.174745	-0.0355051	0.0150896	0.0186256	0.965118	0.936992	0.994088	0.0915171	332.329	Sun
CFH	rs2274700	Wald ratio	1	0.398961	0.0409277	0.0174625	0.019091	1.04178	1.00672	1.07805	0.0644186	227.149	Sun
CLMP	rs35483681	Wald ratio	1	0.553649	0.0601443	0.0256616	0.019091	1.06199	1.0099	1.11677	0.0307421	104.635	Sun
CD59	rs2273121	Wald ratio	1	0.251594	0.0469613	0.0201657	0.0198714	1.04808	1.00746	1.09034	0.0493497	171.256	Sun
NPW	rs35327014	Wald ratio	1	0.231175	0.0445382	0.0192218	0.0204997	1.04554	1.00689	1.08569	0.0646904	228.174	Sun
IL6R	rs4129267	Wald ratio	1	0.400047	-0.0134553	0.00583064	0.0210163	0.986635	0.975424	0.997975	0.596557	4878.12	Sun
FUT10	rs2732317	Wald ratio	1	0.61158	-0.0333259	0.0144412	0.0210163	0.967223	0.94023	0.994991	0.0962505	351.348	Sun
BPIFB1	rs2424961	Wald ratio	1	0.578579	0.0343564	0.0148878	0.0210163	1.03495	1.00519	1.0656	0.0929558	338.088	Sun
TLR4	rs4986790	Wald ratio	1	0.05593	-0.0332631	0.014414	0.0210163	0.967284	0.940339	0.995001	0.0859005	310.016	Sun
FLRT3	rs11908097	Wald ratio	1	0.25127	0.0382538	0.0166517	0.0216018	1.03899	1.00563	1.07346	0.0743094	264.826	Sun
DLL1	rs959025	Wald ratio	1	0.415638	-0.0784929	0.0345369	0.0230426	0.924509	0.863998	0.989257	0.0177398	59.5805	Sun
ASPN, CENPP	rs2516568	Wald ratio	1	0.323246	0.0317528	0.0141829	0.0251685	1.03226	1.00396	1.06136	0.0976369	356.956	Sun
RELT	rs7952686	Wald ratio	1	0.204256	-0.0412121	0.0184242	0.0252967	0.959626	0.92559	0.994912	0.0553129	193.161	Sun
S100A4	rs58056804	Wald ratio	1	0.049682	-0.0653983	0.0297265	0.0278069	0.936694	0.883678	0.992891	0.0240432	81.2726	Sun
DSG2	rs2704050	Wald ratio	1	0.49311	-0.0829876	0.0379372	0.028706	0.920363	0.85441	0.991406	0.0142271	47.6127	Sun
NPTX1	rs62069681	Wald ratio	1	0.09319	-0.0466926	0.0214008	0.029123	0.954381	0.915177	0.995264	0.0446521	154.192	Sun
GP1BA	rs72835078	Wald ratio	1	0.071969	0.0792441	0.0365742	0.0302603	1.08247	1.00759	1.16291	0.0143797	48.1308	Sun
NT5C	rs78625720	Wald ratio	1	0.029536	0.0571125	0.026564	0.0315552	1.05877	1.00506	1.11536	0.0324964	110.807	Sun
AGER	rs2070600	Wald ratio	1	0.066867	-0.052183	0.0243521	0.0321246	0.949155	0.904916	0.995557	0.0412449	141.92	Sun
KLK12	rs3745540	Wald ratio	1	0.593714	0.0464962	0.0219196	0.033904	1.04759	1.00354	1.09358	0.0437382	150.892	Sun
NRP1	rs2506149	Wald ratio	1	0.358077	0.0499109	0.0235294	0.033904	1.05118	1.0038	1.10079	0.0361705	123.805	Sun
SEMA3G	rs2016575	Wald ratio	1	0.815652	-0.0669892	0.0316338	0.034205	0.935205	0.878981	0.995025	0.0217124	73.2191	Sun
LAMC2	rs2276543	Wald ratio	1	0.279009	0.0243704	0.0115353	0.0346285	1.02467	1.00176	1.0481	0.152417	593.245	Sun
ART3	rs4859610	Wald ratio	1	0.774293	0.0473653	0.0224985	0.0352684	1.0485	1.00327	1.09578	0.0398841	137.043	Sun
TIMP4	rs454615	Wald ratio	1	0.830831	0.0367122	0.0175403	0.0363471	1.03739	1.00234	1.07368	0.0675752	239.087	Sun
CPNE1	rs12481228	Wald ratio	1	0.097658	-0.0235415	0.011259	0.0365362	0.976733	0.955415	0.998527	0.168228	667.231	Sun
SPARCL1	rs7681694	Wald ratio	1	0.3366	-0.0263405	0.0126058	0.036658	0.974003	0.950233	0.998368	0.126161	476.296	Sun
QDPR	rs28719835	Wald ratio	1	0.242578	-0.0282287	0.013585	0.0377165	0.972166	0.946622	0.998399	0.118054	441.59	Sun
RARRES1	rs61696028	Wald ratio	1	0.146047	0.013467	0.00665869	0.0431276	1.01356	1.00042	1.02687	0.445615	2651.74	Sun
GZMM	rs16989724	Wald ratio	1	0.935134	0.0697188	0.0348594	0.0455003	1.07221	1.0014	1.14803	0.0224628	75.8076	Sun
AHSG	rs35094235	Wald ratio	1	0.731004	0.0223928	0.0113564	0.0486289	1.02265	1.00013	1.04566	0.153721	599.242	Sun
HAVCR1	rs6889164	Wald ratio	1	0.290178	0.032887	0.0166784	0.0486289	1.03343	1.0002	1.06777	0.0746537	266.152	Sun
ACP1	rs79716074	Wald ratio	1	0.337134	-0.011234	0.00570342	0.0488731	0.988829	0.977837	0.999945	0.598515	4918	Sun
CTSB	rs1692819	Wald ratio	1	0.291825	-0.0329722	0.0171927	0.0551353	0.967565	0.935504	1.00073	0.0745166	265.624	Sun
IL16	rs4778639	Wald ratio	1	0.09142	-0.0337987	0.0176341	0.0552803	0.966766	0.933923	1.00076	0.0769291	274.94	Sun
MTRF1L	rs503366	Wald ratio	1	0.497366	-0.0726392	0.0381356	0.056811	0.929936	0.862962	1.00211	0.0136451	45.6381	Sun
RNASE6	rs11622942	Wald ratio	1	0.233384	-0.0140407	0.00742152	0.0585054	0.986057	0.971818	1.00051	0.355759	1821.76	Sun
PF4V1	rs941758	Wald ratio	1	0.708177	0.0263318	0.0139761	0.0595571	1.02668	0.998939	1.05519	0.100744	369.587	Sun
FAM3B	rs73226194	Wald ratio	1	0.039928	-0.0278382	0.014789	0.0597881	0.972546	0.94476	1.00115	0.101305	371.877	Sun
NTN4	rs17288108	Wald ratio	1	0.181915	0.0575747	0.0305865	0.0597881	1.05926	0.997628	1.12471	0.0229866	77.6168	Sun
ERAP2	rs2927608	Wald ratio	1	0.437292	0.0114036	0.00608192	0.0607927	1.01147	0.999483	1.0236	0.544959	3950.89	Sun
CHRDL2	rs11607100	Wald ratio	1	0.041669	0.0467363	0.024926	0.0607927	1.04785	0.997884	1.10031	0.0329074	112.255	Sun
IL1RAP	rs6444442	Wald ratio	1	0.841013	0.012574	0.00673077	0.0617437	1.01265	0.999382	1.0261	0.488819	3154.68	Sun
TMEM132A	rs11230521	Wald ratio	1	0.231444	-0.0226684	0.0121438	0.0619482	0.977587	0.954593	1.00113	0.135696	517.943	Sun
SERPINA4	rs10139745	Wald ratio	1	0.221432	0.0227052	0.0123257	0.0654598	1.02296	0.998548	1.04798	0.131091	497.717	Sun
SPINK6	rs1432688	Wald ratio	1	0.924477	0.0207959	0.0113432	0.066753	1.02101	0.998564	1.04397	0.156277	611.05	Sun
GPC5	rs342702	Wald ratio	1	0.274008	0.0161651	0.00882865	0.0671026	1.0163	0.998862	1.03404	0.257308	1142.95	Sun
SIRPA	rs6136377	Wald ratio	1	0.368754	-0.00991244	0.00545184	0.0690363	0.990137	0.979613	1.00077	0.682286	7084.57	Sun
ENPP5	rs1047153	Wald ratio	1	0.646395	0.0152072	0.00836396	0.0690363	1.01532	0.998815	1.03211	0.28465	1312.73	Sun
FAM151A	rs11206397	Wald ratio	1	0.326689	0.0452659	0.0248963	0.0690363	1.04631	0.996475	1.09863	0.0309172	105.25	Sun
TXNDC5	rs111331197	Wald ratio	1	0.009588	0.0412888	0.0228563	0.0708478	1.04215	0.996497	1.0899	0.034937	119.43	Sun
IGF2R	rs629849	Wald ratio	1	0.870653	-0.0189057	0.0105649	0.0735386	0.981272	0.961161	1.0018	0.182114	734.571	Sun
PTGFRN	rs4233450	Wald ratio	1	0.829141	-0.0149895	0.00839412	0.0741455	0.985122	0.969047	1.00146	0.283729	1306.8	Sun
TGFBI	rs13159365	Wald ratio	1	0.507136	-0.0246581	0.0138982	0.0760311	0.975643	0.949425	1.00259	0.0994823	364.448	Sun
FCRL4	rs11582663	Wald ratio	1	0.144281	-0.0132404	0.00750287	0.0776132	0.986847	0.972441	1.00147	0.316923	1530.62	Sun
DNAJC30	rs73702564	Wald ratio	1	0.038602	-0.0389809	0.0222748	0.0801183	0.961769	0.920683	1.00469	0.0382961	131.37	Sun
GPNMB	rs2268748	Wald ratio	1	0.0406	-0.0407688	0.0232964	0.0801183	0.960051	0.9172	1.0049	0.0367465	125.851	Sun
UROS	rs10794029	Wald ratio	1	0.794492	0.0601116	0.0343495	0.0801183	1.06196	0.992813	1.13591	0.0177128	59.4882	Sun
KREMEN1	rs77320622	Wald ratio	1	0.007687	-0.0703447	0.040197	0.0801183	0.932072	0.861456	1.00848	0.0151067	50.6014	Sun
SCG3	rs1378892	Wald ratio	1	0.763554	-0.026749	0.0154321	0.0830364	0.973606	0.944598	1.0035	0.0852853	307.589	Sun
LTF	rs6441996	Wald ratio	1	0.23776	0.0302045	0.0174257	0.0830364	1.03067	0.996058	1.06647	0.0671437	237.45	Sun
OSMR	rs357253	Wald ratio	1	0.231854	0.0622307	0.0359023	0.0830364	1.06421	0.991895	1.14179	0.0155441	52.0896	Sun
MGAT2	rs28396798	Wald ratio	1	0.54747	-0.0564392	0.0328374	0.0856599	0.945124	0.886211	1.00795	0.0188218	63.2843	Sun
SEMA3C	rs1019016	Wald ratio	1	0.581376	0.0628212	0.0365505	0.0856599	1.06484	0.991221	1.14392	0.0149239	49.98	Sun
FCN1	rs11103602	Wald ratio	1	0.258023	0.0205938	0.0121847	0.091001	1.02081	0.996717	1.04548	0.130008	492.987	Sun
TNFSF12	rs12941509	Wald ratio	1	0.279301	-0.0305111	0.0180524	0.091001	0.96995	0.93623	1.00488	0.0622736	219.084	Sun
DSC2	rs1789063	Wald ratio	1	0.768825	-0.0602131	0.0356647	0.0913514	0.941564	0.877994	1.00974	0.0165693	55.583	Sun
COLEC11	rs6542680	Wald ratio	1	0.820857	-0.0137309	0.00823853	0.0955807	0.986363	0.970564	1.00242	0.305743	1452.84	Sun
DKK1	rs1194673	Wald ratio	1	0.632462	0.060307	0.0361842	0.0955807	1.06216	0.989442	1.14023	0.0154674	51.8285	Sun
ICOSLG	rs11558819	Wald ratio	1	0.268737	0.0225616	0.0137105	0.0998524	1.02282	0.995698	1.05068	0.13049	495.091	Sun
TNC	rs1138545	Wald ratio	1	0.153428	-0.0164127	0.0100821	0.103545	0.983721	0.964473	1.00335	0.189015	768.893	Sun
SPINT3	rs6017591	Wald ratio	1	0.541306	-0.0184128	0.0116001	0.112444	0.981756	0.959686	1.00433	0.146472	566.135	Sun
CNTN5	rs4316475	Wald ratio	1	0.92173	0.0491846	0.0310639	0.113346	1.05041	0.988367	1.11636	0.0215317	72.5962	Sun
TNXB	rs45531831	Wald ratio	1	0.023212	-0.0171301	0.0108491	0.114348	0.983016	0.962333	1.00414	0.13908	532.946	Sun
RNASE1	rs17254387	Wald ratio	1	0.687505	0.0477845	0.0304083	0.116083	1.04894	0.988254	1.11336	0.0227698	76.8679	Sun
VEGFA	rs6921438	Wald ratio	1	0.496842	0.0142389	0.00911291	0.11817	1.01434	0.996384	1.03262	0.246603	1079.83	Sun
ROR1	rs1408416	Wald ratio	1	0.161988	0.0295455	0.0193182	0.126162	1.02999	0.991716	1.06973	0.0525616	183.021	Sun
EPHB6	rs7789303	Wald ratio	1	0.273328	-0.0340136	0.0222635	0.126568	0.966558	0.925288	1.00967	0.0415463	143.003	Sun
CD109	rs6903575	Wald ratio	1	0.521546	-0.0231548	0.0151954	0.127556	0.977111	0.948439	1.00665	0.085787	309.568	Sun
DPP7	rs10747049	Wald ratio	1	0.749544	-0.032958	0.0216973	0.128766	0.967579	0.927294	1.00961	0.0497737	172.805	Sun
SIGLEC7	rs140185670	Wald ratio	1	0.07999	0.0344884	0.0229923	0.133614	1.03509	0.989479	1.0828	0.0545695	190.416	Sun
QPCTL	rs17850756	Wald ratio	1	0.327901	-0.0381812	0.0256855	0.13715	0.962539	0.91528	1.01224	0.0365841	125.274	Sun
NCAM1	rs7113211	Wald ratio	1	0.489041	-0.0460494	0.0310228	0.137709	0.954995	0.898657	1.01486	0.0212696	71.6934	Sun
LCT	rs4988235	Wald ratio	1	0.711217	-0.0141771	0.00966619	0.142467	0.985923	0.96742	1.00478	0.247295	1083.86	Sun
TFF1	rs3761376	Wald ratio	1	0.241766	0.0499093	0.034029	0.142467	1.05118	0.983352	1.12368	0.0178095	59.8189	Sun
SPOCK3	rs17599599	Wald ratio	1	0.028272	-0.0342102	0.0235933	0.147059	0.966368	0.922698	1.01211	0.0394835	135.61	Sun
GLCE	rs11854180	Wald ratio	1	0.769146	-0.0132754	0.0091721	0.147794	0.986812	0.969231	1.00471	0.243818	1063.71	Sun
CDNF	rs61738953	Wald ratio	1	0.041783	-0.0413157	0.0286032	0.148614	0.959526	0.907213	1.01486	0.0317109	108.04	Sun
NPPB	rs198389	Wald ratio	1	0.412581	-0.0313565	0.0218132	0.150576	0.96913	0.928569	1.01146	0.0417261	143.648	Sun
LMAN2L	rs2271893	Wald ratio	1	0.322912	0.0380518	0.0266362	0.153127	1.03878	0.985944	1.09446	0.0302002	102.733	Sun
REN	rs193280350	Wald ratio	1	0.007611	0.0417049	0.0291934	0.153127	1.04259	0.984606	1.10398	0.021713	73.221	Sun
CSGALNACT2	rs2435349	Wald ratio	1	0.272811	0.0509944	0.0356961	0.153127	1.05232	0.981209	1.12858	0.0152579	51.1157	Sun
C1QC	rs78865058	Wald ratio	1	0.041707	0.0223173	0.0158081	0.158019	1.02257	0.991371	1.05475	0.0924437	336.036	Sun
HBZ	rs2461286	Wald ratio	1	0.646861	0.0113045	0.00802623	0.158998	1.01137	0.995583	1.0274	0.357504	1835.66	Sun
PLAU	rs2227551	Wald ratio	1	0.716116	-0.0410678	0.0291581	0.158998	0.959764	0.906452	1.01621	0.0241075	81.4953	Sun
IL1RN	rs6761276	Wald ratio	1	0.577697	0.0471945	0.0335606	0.15965	1.04833	0.981587	1.1196	0.0177442	59.5955	Sun
IGLL1	rs139571703	Wald ratio	1	0.037383	0.0385463	0.027533	0.161513	1.0393	0.9847	1.09693	0.037976	130.228	Sun
FUT8	rs2127870	Wald ratio	1	0.784568	0.0104862	0.00753098	0.1638	1.01054	0.995735	1.02557	0.371982	1954.03	Sun
CPB1	rs13318853	Wald ratio	1	0.23152	-0.0429185	0.0308233	0.1638	0.95799	0.901827	1.01765	0.0233748	78.9592	Sun
GSTO1	rs2282326	Wald ratio	1	0.353535	0.00999122	0.00724638	0.16796	1.01004	0.995797	1.02449	0.379187	2015	Sun
DPT	rs1018454	Wald ratio	1	0.585888	-0.0211793	0.0154031	0.169131	0.979043	0.949928	1.00905	0.0837731	301.636	Sun
C4A,C4B	rs406658	Wald ratio	1	0.118621	-0.0265628	0.0194794	0.172682	0.973787	0.937309	1.01168	0.0666791	235.69	Sun
WISP1	rs35472615	Wald ratio	1	0.274129	-0.0193624	0.0142773	0.175047	0.980824	0.953757	1.00866	0.104039	383.08	Sun
QSOX2	rs10858248	Wald ratio	1	0.502175	-0.0252242	0.018778	0.17918	0.975091	0.939855	1.01165	0.0636519	224.262	Sun
CCL15	rs854624	Wald ratio	1	0.930513	-0.00946074	0.00709555	0.182422	0.990584	0.976903	1.00446	0.369867	1936.41	Sun
SEMA3E	rs3757607	Wald ratio	1	0.12244	-0.011603	0.00874688	0.184664	0.988464	0.971662	1.00556	0.269759	1218.69	Sun
MSMB	rs10993994	Wald ratio	1	0.59627	-0.00926586	0.00702576	0.187222	0.990777	0.977227	1.00451	0.464382	2860.24	Sun
CD177	rs73554000	Wald ratio	1	0.023826	0.0160825	0.0122005	0.187443	1.01621	0.9922	1.04081	0.15125	587.894	Sun
PPIL1	rs12194408	Wald ratio	1	0.030241	0.022604	0.017179	0.188245	1.02286	0.988994	1.05789	0.0717464	254.986	Sun
IGFBP7	rs1718849	Wald ratio	1	0.766286	-0.0267512	0.0206839	0.195896	0.973603	0.934922	1.01388	0.0470935	163.04	Sun
MTHFS	rs7173566	Wald ratio	1	0.342884	0.0399812	0.0310442	0.197788	1.04079	0.979351	1.10609	0.0203679	68.5907	Sun
IL18R1	rs1420106	Wald ratio	1	0.775551	0.0106769	0.00836544	0.201844	1.01073	0.994297	1.02744	0.287348	1330.19	Sun
CCL16	rs112689088	Wald ratio	1	0.097531	0.00918334	0.00721548	0.203115	1.00923	0.995053	1.0236	0.409129	2284.28	Sun
SEMA6A	rs3733724	Wald ratio	1	0.096841	-0.0427611	0.033598	0.203115	0.95814	0.897077	1.02336	0.0187504	63.0396	Sun
PPT1	rs7533094	Wald ratio	1	0.041979	-0.0220392	0.0173994	0.205275	0.978202	0.945405	1.01214	0.0597795	209.751	Sun
BCAN	rs41267397	Wald ratio	1	0.004218	0.0355802	0.0281676	0.206532	1.03622	0.980563	1.09504	0.0343993	117.526	Sun
ADAMTS5	rs2830586	Wald ratio	1	0.16451	-0.0189003	0.0151203	0.2113	0.981277	0.952623	1.01079	0.0931128	338.718	Sun
NCR3	rs986475	Wald ratio	1	0.07066	0.0271444	0.0217155	0.2113	1.02752	0.9847	1.07219	0.0401051	137.835	Sun
CREG1	rs7513428	Wald ratio	1	0.836173	-0.0353584	0.0282867	0.2113	0.965259	0.9132	1.02029	0.0265162	89.8598	Sun
IDO1	rs7010461	Wald ratio	1	0.333882	-0.0364	0.0292	0.212553	0.964255	0.910618	1.02105	0.0278006	94.3368	Sun
SCARA5	rs10866867	Wald ratio	1	0.722132	0.0342925	0.0275916	0.21392	1.03489	0.980407	1.09239	0.0258301	87.4729	Sun
APCS	rs71632673	Wald ratio	1	0.022925	0.031067	0.0250926	0.215681	1.03155	0.982049	1.08356	0.0313772	106.867	Sun
PDCD1LG2	rs16923189	Wald ratio	1	0.297639	-0.0221707	0.0180459	0.219233	0.978073	0.944084	1.01329	0.06291	221.473	Sun
ISG15	rs1891906	Wald ratio	1	0.385856	-0.0335648	0.027392	0.220443	0.966992	0.916445	1.02033	0.0318416	108.5	Sun
GFRA2	rs15881	Wald ratio	1	0.455607	0.0264049	0.0216655	0.222939	1.02676	0.984069	1.0713	0.0432866	149.264	Sun
SPINK2	rs11941335	Wald ratio	1	0.021062	0.0280112	0.0230092	0.223455	1.02841	0.983058	1.07585	0.0412038	141.773	Sun
CNTNAP2	rs10274393	Wald ratio	1	0.711014	-0.0196214	0.0161588	0.224639	0.98057	0.950001	1.01212	0.0771191	275.676	Sun
IL12RB2	rs12566098	Wald ratio	1	0.688055	-0.0319315	0.0264798	0.227863	0.968573	0.919586	1.02017	0.0283088	96.1115	Sun
NQO1	rs77944668	Wald ratio	1	0.19326	-0.0133369	0.0110696	0.228273	0.986752	0.965573	1.00839	0.175306	701.271	Sun
B4GALT2	rs2286241	Wald ratio	1	0.056172	-0.0267459	0.0222883	0.230139	0.973609	0.931992	1.01708	0.0480256	166.429	Sun
ANGPTL1	rs16853043	Wald ratio	1	0.352388	-0.0183508	0.015331	0.231318	0.981817	0.952753	1.01177	0.0845887	304.844	Sun
TEK	rs35030851	Wald ratio	1	0.046653	-0.0340929	0.0287099	0.23503	0.966482	0.913598	1.02243	0.0276273	93.7321	Sun
PTHLH	rs10843115	Wald ratio	1	0.271368	-0.0451128	0.038131	0.23677	0.95589	0.887054	1.03007	0.0137106	45.86	Sun
B4GALT1	rs7019909	Wald ratio	1	0.102573	-0.0290308	0.0245645	0.237278	0.971387	0.925726	1.0193	0.0369173	126.459	Sun
CACNA2D3	rs34084772	Wald ratio	1	0.184066	-0.0429369	0.0364963	0.239407	0.957972	0.891839	1.02901	0.0162929	54.6404	Sun
CSF2RB	rs1534881	Wald ratio	1	0.445804	-0.0237492	0.020266	0.241247	0.976531	0.938502	1.0161	0.049279	170.998	Sun
RETN	rs34124816	Wald ratio	1	0.037632	-0.0345224	0.0295907	0.243345	0.966067	0.911631	1.02375	0.0268018	90.8542	Sun
CX3CL1	rs62037084	Wald ratio	1	0.00646	0.0369246	0.0320013	0.248563	1.03761	0.974532	1.10478	0.0190652	64.1185	Sun
SERPINF2	rs11657394	Wald ratio	1	0.077401	-0.0433651	0.0375831	0.248563	0.957562	0.88956	1.03076	0.017088	57.3533	Sun
TPST2	rs2283824	Wald ratio	1	0.416943	0.0296418	0.0263483	0.260589	1.03009	0.978239	1.08468	0.0286862	97.4306	Sun
LSAMP	rs2116308	Wald ratio	1	0.86741	0.036315	0.0324924	0.263718	1.03698	0.973001	1.10517	0.0157413	52.7611	Sun
CPM	rs1908671	Wald ratio	1	0.292111	0.041958	0.0376547	0.265157	1.04285	0.968657	1.12273	0.0142923	47.8339	Sun
C10orf54	rs10762477	Wald ratio	1	0.14794	0.0369686	0.0332717	0.266521	1.03766	0.972151	1.10758	0.0184468	61.9996	Sun
APOM	rs1266078	Wald ratio	1	0.031876	0.0408247	0.0367422	0.266521	1.04167	0.969291	1.11945	0.0148129	49.6025	Sun
CA6	rs3765963	Wald ratio	1	0.402359	0.0107892	0.00975466	0.2687	1.01085	0.991705	1.03036	0.220165	931.382	Sun
ENPP7	rs11871061	Wald ratio	1	0.359387	0.0076011	0.00689166	0.270053	1.00763	0.994111	1.02133	0.448289	2680.58	Sun
MANSC1	rs2160588	Wald ratio	1	0.119697	0.0218949	0.0199045	0.271332	1.02214	0.983028	1.0628	0.0531918	185.338	Sun
CFI	rs7439493	Wald ratio	1	0.415959	-0.0227856	0.0208601	0.274698	0.977472	0.938313	1.01826	0.0471757	163.338	Sun
ERLEC1	rs58359565	Wald ratio	1	0.218741	0.0404624	0.0370906	0.275313	1.04129	0.968279	1.11981	0.0147302	49.3216	Sun
DEFB1	rs2738176	Wald ratio	1	0.365039	-0.017981	0.0166966	0.281515	0.98218	0.950558	1.01485	0.0702563	249.29	Sun
F10	rs547138	Wald ratio	1	0.614611	-0.0282836	0.0263464	0.283034	0.972113	0.923188	1.02363	0.0315577	107.501	Sun
DCBLD2	rs9864010	Wald ratio	1	0.054612	0.0241975	0.0225843	0.283977	1.02449	0.980132	1.07086	0.03968	136.313	Sun
CEL	rs8193016	Wald ratio	1	0.034777	-0.027721	0.026262	0.291171	0.97266	0.92386	1.02404	0.0315383	107.433	Sun
SMPDL3A	rs28385609	Wald ratio	1	0.145044	0.00892525	0.00846039	0.29145	1.00897	0.992372	1.02584	0.286929	1327.47	Sun
THSD1	rs41292808	Wald ratio	1	0.026681	-0.0231814	0.0220775	0.293718	0.977085	0.935707	1.02029	0.0426234	146.875	Sun
CCL8	rs1133763	Wald ratio	1	0.158239	0.0398441	0.0381117	0.295813	1.04065	0.965746	1.12136	0.014203	47.5308	Sun
CBR1	rs16993864	Wald ratio	1	0.021978	-0.0197515	0.0189285	0.296727	0.980442	0.944735	1.0175	0.0634733	223.59	Sun
SFRP1	rs138942288	Wald ratio	1	0.004991	-0.0377708	0.0363455	0.298704	0.962934	0.896723	1.03403	0.0195562	65.8026	Sun
CPA4	rs34587586	Wald ratio	1	0.392741	-0.00574713	0.00557557	0.302649	0.994269	0.983463	1.00519	0.648274	6080.45	Sun
HRSP12	rs1462977	Wald ratio	1	0.322718	0.020372	0.0197815	0.30308	1.02058	0.981768	1.06093	0.0501479	174.172	Sun
CTSZ	rs199825459	Wald ratio	1	0.009982	-0.0163391	0.0158853	0.303681	0.983794	0.953635	1.01491	0.0959484	350.128	Sun
CA3	rs2072696	Wald ratio	1	0.23803	0.0355002	0.0345781	0.304577	1.03614	0.968242	1.10879	0.0170655	57.2765	Sun
GFRAL	rs72975088	Wald ratio	1	0.1485	0.0356709	0.0348602	0.306187	1.03631	0.967872	1.1096	0.0153914	51.5701	Sun
SLAMF7	rs11581248	Wald ratio	1	0.142448	-0.0079384	0.00777963	0.307535	0.992093	0.97708	1.00734	0.387687	2088.77	Sun
PENK	rs2670014	Wald ratio	1	0.473963	-0.0137546	0.0135397	0.30969	0.98634	0.960509	1.01287	0.107958	399.258	Sun
PDGFD	rs7950273	Wald ratio	1	0.287969	0.0254638	0.0251	0.310348	1.02579	0.976547	1.07752	0.0309902	105.506	Sun
THBS2	rs73043857	Wald ratio	1	0.102347	0.0136071	0.0136071	0.317311	1.0137	0.987022	1.0411	0.120079	450.199	Sun
IFI16	rs72709516	Wald ratio	1	0.04404	0.0187838	0.0187838	0.317311	1.01896	0.982129	1.05717	0.0610931	214.66	Sun
EMILIN3	rs61739314	Wald ratio	1	0.033292	-0.0247994	0.0247994	0.317311	0.975506	0.929223	1.02409	0.0302468	102.897	Sun
SELL	rs4987358	Wald ratio	1	0.27377	0.0135528	0.0137464	0.324175	1.01365	0.986699	1.04133	0.106079	391.484	Sun
POMGNT2	rs729654	Wald ratio	1	0.473213	-0.0238188	0.0242093	0.325179	0.976463	0.931211	1.02391	0.0326995	111.522	Sun
CCL3L1	rs2015086	Wald ratio	1	0.131452	0.0189516	0.0193548	0.327498	1.01913	0.981195	1.05854	0.0561765	196.357	Sun
SERPINA10	rs941591	Wald ratio	1	0.161969	0.00991755	0.0101565	0.328831	1.00997	0.99006	1.03027	0.190138	774.534	Sun
NRP2	rs16837641	Wald ratio	1	0.321865	-0.0319962	0.0329513	0.331541	0.96851	0.907937	1.03313	0.0191414	64.3797	Sun
CCL3	rs712042	Wald ratio	1	0.862346	0.0128779	0.0134378	0.337895	1.01296	0.98663	1.04	0.121167	454.84	Sun
CHST9	rs9952639	Wald ratio	1	0.31788	0.0195137	0.0204143	0.339132	1.01971	0.97971	1.06133	0.0481175	166.764	Sun
TIE1	rs2275180	Wald ratio	1	0.623345	0.0244287	0.0256107	0.340162	1.02473	0.974561	1.07748	0.0302472	102.898	Sun
FCRL3	rs7528684	Wald ratio	1	0.465109	-0.011422	0.0119931	0.340904	0.988643	0.965674	1.01216	0.137298	525.033	Sun
CST6	rs3825068	Wald ratio	1	0.027795	-0.0335289	0.0352054	0.340904	0.967027	0.90255	1.03611	0.0192298	64.683	Sun
FRZB	rs288326	Wald ratio	1	0.12625	-0.0167993	0.0176835	0.342112	0.983341	0.949843	1.01802	0.0705527	250.421	Sun
RFESD	rs77881626	Wald ratio	1	0.04763	-0.0267917	0.0284662	0.346614	0.973564	0.920733	1.02943	0.0323561	110.312	Sun
LY96	rs6472812	Wald ratio	1	0.950705	-0.0319043	0.0338983	0.346614	0.968599	0.906336	1.03514	0.0235733	79.6459	Sun
RRM2B	rs74589258	Wald ratio	1	0.07035	0.0368777	0.0399508	0.355967	1.03757	0.95942	1.12208	0.01385	46.3327	Sun
CTSS	rs41271951	Wald ratio	1	0.08349	0.0127833	0.0139454	0.359317	1.01287	0.985556	1.04093	0.113319	421.617	Sun
FLRT2	rs17796777	Wald ratio	1	0.285507	0.0280493	0.0305992	0.359317	1.02845	0.968579	1.09201	0.0225886	76.2419	Sun
IL17RD	rs6776722	Wald ratio	1	0.695339	-0.0136275	0.0149254	0.36122	0.986465	0.958025	1.01575	0.0905506	328.469	Sun
CRP	rs2808628	Wald ratio	1	0.333931	-0.0340659	0.0373626	0.361893	0.966508	0.898259	1.03994	0.014735	49.3376	Sun
IL27RA	rs35026308	Wald ratio	1	0.176436	0.00856508	0.00941102	0.362763	1.0086	0.990168	1.02738	0.259909	1158.56	Sun
CCL23	rs712048	Wald ratio	1	0.873722	0.012073	0.0133077	0.364292	1.01215	0.986088	1.03889	0.117238	438.132	Sun
SCARF2	rs738086	Wald ratio	1	0.811314	-0.0253587	0.028028	0.365592	0.97496	0.922845	1.03002	0.0275	93.2878	Sun
PLXNC1	rs115651556	Wald ratio	1	0.013723	-0.0121229	0.0135217	0.369958	0.98795	0.962111	1.01448	0.124512	469.184	Sun
TMEM190	rs4806666	Wald ratio	1	0.438473	0.00591775	0.00661986	0.371354	1.00594	0.992968	1.01907	0.489479	3163.02	Sun
PEAR1	rs12137505	Wald ratio	1	0.406496	0.0260557	0.0292004	0.372228	1.0264	0.969304	1.08686	0.0239089	80.8076	Sun
ST3GAL1	rs9643300	Wald ratio	1	0.562654	-0.0221704	0.024893	0.37313	0.978074	0.931498	1.02698	0.0325312	110.929	Sun
FUT5	rs778809	Wald ratio	1	0.301394	0.0112069	0.0125862	0.373245	1.01127	0.986628	1.03653	0.141662	544.474	Sun
SERPING1	rs11229075	Wald ratio	1	0.261304	0.0103007	0.011796	0.382533	1.01035	0.987262	1.03399	0.139859	536.418	Sun
SELP	rs6136	Wald ratio	1	0.107874	-0.0107767	0.012387	0.3843	0.989281	0.965552	1.01359	0.125442	473.191	Sun
CFB	rs4151667	Wald ratio	1	0.041843	-0.014217	0.0164042	0.386125	0.985884	0.954689	1.0181	0.0670443	237.074	Sun
PLG	rs189821701	Wald ratio	1	0.007028	0.024068	0.0278119	0.386828	1.02436	0.970015	1.08175	0.0487913	169.219	Sun
FGF7	rs7162172	Wald ratio	1	0.391898	0.0301724	0.0350216	0.388942	1.03063	0.962261	1.10386	0.0164186	55.069	Sun
SPINT2	rs71354995	Wald ratio	1	0.242563	-0.00625757	0.00726686	0.389177	0.993762	0.979708	1.00802	0.360722	1861.51	Sun
PDCD5	rs4499344	Wald ratio	1	0.291128	-0.0169492	0.019774	0.391366	0.983194	0.945817	1.02205	0.0517235	179.943	Sun
LILRA5	rs759819	Wald ratio	1	0.330491	0.0108676	0.0127095	0.392511	1.01093	0.986055	1.03643	0.130432	494.84	Sun
CTSH	rs34593439	Wald ratio	1	0.110656	0.00819529	0.00959024	0.392803	1.00823	0.989454	1.02736	0.258941	1152.74	Sun
CD55	rs11580387	Wald ratio	1	0.233948	0.0120898	0.0142007	0.394574	1.01216	0.98438	1.04073	0.0973307	355.716	Sun
HDHD2	rs75228657	Wald ratio	1	0.052264	0.0156673	0.0185159	0.397467	1.01579	0.979587	1.05333	0.0488335	169.373	Sun
SEMA5A	rs17329170	Wald ratio	1	0.100634	-0.00649441	0.00768156	0.397857	0.993527	0.97868	1.0086	0.371191	1947.42	Sun
PDIA5	rs2278668	Wald ratio	1	0.593477	0.0105445	0.0126534	0.404657	1.0106	0.985845	1.03598	0.131279	498.535	Sun
TIRAP	rs111577916	Wald ratio	1	0.024689	0.0315402	0.0385491	0.413253	1.03204	0.956939	1.11304	0.0156853	52.5703	Sun
CD300C	rs62087214	Wald ratio	1	0.038512	0.0191543	0.0235745	0.416505	1.01934	0.973311	1.06754	0.0341134	116.515	Sun
CLIC5	rs35822882	Wald ratio	1	0.033649	0.0231639	0.0286143	0.418214	1.02343	0.967616	1.08247	0.0350276	119.751	Sun
VEGFC	rs41278571	Wald ratio	1	0.010126	0.0143546	0.0177997	0.419982	1.01446	0.979677	1.05047	0.0608058	213.585	Sun
GLRX2	rs148212596	Wald ratio	1	0.019804	0.0168962	0.0211202	0.423711	1.01704	0.975798	1.06002	0.0543975	189.781	Sun
KDR	rs34231037	Wald ratio	1	0.033769	0.0130084	0.0164773	0.429835	1.01309	0.980898	1.04635	0.0867687	313.447	Sun
NQO2	rs138616686	Wald ratio	1	0.335213	0.00802983	0.0101807	0.430268	1.00806	0.988147	1.02838	0.216769	913.04	Sun
MRC1	rs55942822	Wald ratio	1	0.155712	0.00882634	0.0112118	0.431145	1.00887	0.986937	1.03128	0.184818	747.951	Sun
PATE4	rs875500	Wald ratio	1	0.719869	0.0114132	0.0145258	0.432035	1.01148	0.983087	1.04069	0.0936609	340.918	Sun
MIA	rs2604877	Wald ratio	1	0.068031	-0.00652008	0.00832351	0.433431	0.993501	0.977425	1.00984	0.263565	1180.69	Sun
GRAMD1C	rs61077924	Wald ratio	1	0.324013	0.0083898	0.0108099	0.437678	1.00843	0.987284	1.03002	0.168281	667.482	Sun
EVA1C	rs6517101	Wald ratio	1	0.331469	0.0290179	0.0373884	0.437678	1.02944	0.956702	1.10771	0.0142321	47.6297	Sun
OAF	rs117554512	Wald ratio	1	0.086262	0.0124707	0.0161385	0.439684	1.01255	0.981022	1.04509	0.073237	260.702	Sun
UCMA	rs2093847	Wald ratio	1	0.106703	0.0144977	0.0187617	0.439684	1.0146	0.977971	1.05261	0.0655303	231.345	Sun
GALP	rs111265125	Wald ratio	1	0.021819	-0.0309215	0.0401979	0.441756	0.969552	0.896095	1.04903	0.0178576	59.9835	Sun
SERPINE2	rs68066031	Wald ratio	1	0.258001	-0.0140812	0.0185402	0.447557	0.986017	0.95083	1.02251	0.0695149	246.462	Sun
NAAA	rs9996608	Wald ratio	1	0.300448	0.00966272	0.0127621	0.448964	1.00971	0.984766	1.03528	0.126466	477.612	Sun
MFGE8	rs1961839	Wald ratio	1	0.397423	0.0217488	0.0288504	0.450942	1.02199	0.9658	1.08144	0.0243118	82.2033	Sun
SERPINF1	rs62088172	Wald ratio	1	0.344526	-0.0114632	0.0152843	0.453255	0.988602	0.959426	1.01867	0.0893989	323.882	Sun
IMPAD1	rs112433249	Wald ratio	1	0.017358	-0.0134254	0.0179005	0.453255	0.986664	0.952647	1.0219	0.083466	300.43	Sun
LRRC15	rs57514363	Wald ratio	1	0.112882	-0.012654	0.0168719	0.453255	0.987426	0.955307	1.02062	0.0703568	249.673	Sun
NFASC	rs6667532	Wald ratio	1	0.10515	0.00996839	0.0133722	0.455997	1.01002	0.98389	1.03684	0.127341	481.398	Sun
IL1R2	rs7561460	Wald ratio	1	0.395872	0.011677	0.0159006	0.46272	1.01175	0.9807	1.04377	0.07749	277.113	Sun
HS6ST1	rs34827544	Wald ratio	1	0.157293	0.0216535	0.0295276	0.463355	1.02189	0.964428	1.08278	0.024629	83.3026	Sun
XCL1	rs4656599	Wald ratio	1	0.189892	0.0137369	0.0188591	0.466372	1.01383	0.977041	1.05201	0.0567552	198.502	Sun
ESD	rs8192888	Wald ratio	1	0.093911	-0.00992187	0.0136426	0.467059	0.990127	0.964003	1.01696	0.11064	410.407	Sun
PRCP	rs2229437	Wald ratio	1	0.180887	0.0209622	0.028866	0.467722	1.02118	0.965012	1.08062	0.0250938	84.9154	Sun
ALDH3A1	rs887241	Wald ratio	1	0.661635	0.0198265	0.0276745	0.473733	1.02002	0.96617	1.07688	0.0262436	88.911	Sun
TMEM132C	rs11059617	Wald ratio	1	0.335066	-0.0213333	0.0297778	0.473733	0.978893	0.923395	1.03773	0.0225582	76.1369	Sun
COL15A1	rs41305481	Wald ratio	1	0.301866	0.0201067	0.0283135	0.477614	1.02031	0.965231	1.07853	0.0250319	84.7005	Sun
FCER2	rs12973524	Wald ratio	1	0.484028	-0.0146963	0.0209014	0.481978	0.985411	0.945858	1.02662	0.0468314	162.088	Sun
CHL1	rs1015456	Wald ratio	1	0.391779	-0.0216138	0.03122	0.488744	0.978618	0.920531	1.04037	0.0206583	69.5892	Sun
COL11A2	rs3129205	Wald ratio	1	0.347767	0.017037	0.0248148	0.492356	1.01718	0.968894	1.06788	0.0330711	112.833	Sun
FAM3D	rs3749290	Wald ratio	1	0.09578	0.0155925	0.022869	0.495354	1.01571	0.971192	1.06228	0.0400746	137.725	Sun
GFRA1	rs10885877	Wald ratio	1	0.295454	0.0173913	0.0257089	0.498742	1.01754	0.96754	1.07013	0.029126	98.9692	Sun
ESAM	rs61753651	Wald ratio	1	0.005385	0.0207856	0.0309119	0.50132	1.021	0.96098	1.08478	0.0377116	129.286	Sun
ST3GAL6	rs72934623	Wald ratio	1	0.053172	0.00532368	0.00798552	0.504985	1.00534	0.989725	1.0212	0.355271	1817.88	Sun
NUDT9	rs28696943	Wald ratio	1	0.166852	-0.0162419	0.0243629	0.504985	0.983889	0.938011	1.03201	0.0354538	121.261	Sun
ALCAM	rs9830049	Wald ratio	1	0.120272	-0.020915	0.0316993	0.509386	0.979302	0.920309	1.04208	0.0198146	66.6899	Sun
CXCL11	rs10031452	Wald ratio	1	0.528726	-0.0176117	0.0270619	0.51518	0.982542	0.931785	1.03606	0.0270085	91.5742	Sun
TNFRSF1B	rs5746017	Wald ratio	1	0.041297	-0.0231481	0.0357744	0.517594	0.977118	0.910951	1.04809	0.0178807	60.0625	Sun
PGM1	rs1126728	Wald ratio	1	0.227841	-0.0170791	0.0264901	0.519098	0.983066	0.933327	1.03546	0.0289621	98.3956	Sun
CCL25	rs74959615	Wald ratio	1	0.078294	0.00792344	0.0123482	0.52109	1.00795	0.983853	1.03265	0.136303	520.626	Sun
COL18A1	rs144147445	Wald ratio	1	0.017343	0.0129071	0.0204996	0.528937	1.01299	0.973096	1.05452	0.0591281	207.322	Sun
LRIG3	rs11172791	Wald ratio	1	0.04525	-0.0216263	0.0346021	0.531971	0.978606	0.914437	1.04728	0.0184746	62.0947	Sun
PLA2G2A	rs11573156	Wald ratio	1	0.231634	-0.00450759	0.00734934	0.539656	0.995503	0.981265	1.00995	0.370703	1943.36	Sun
MFAP2	rs4920605	Wald ratio	1	0.553544	-0.0188133	0.0308731	0.542276	0.981363	0.92374	1.04258	0.0212402	71.5922	Sun
CTSF	rs1791679	Wald ratio	1	0.289477	0.0178799	0.0293742	0.542726	1.01804	0.961084	1.07837	0.022698	76.6199	Sun
LILRA6	rs35361042	Wald ratio	1	0.091124	0.00544817	0.00895589	0.542966	1.00546	0.987968	1.02327	0.29738	1396.29	Sun
IL11RA	rs11575578	Wald ratio	1	0.068486	-0.0155972	0.0256663	0.543392	0.984524	0.936221	1.03532	0.0327326	111.639	Sun
PLA2R1	rs3749117	Wald ratio	1	0.501272	-0.00421239	0.0069837	0.546393	0.995796	0.982259	1.00952	0.40689	2263.2	Sun
SIGLEC9	rs2075803	Wald ratio	1	0.55088	-0.00310078	0.00522236	0.552679	0.996904	0.986752	1.00716	0.743149	9545.03	Sun
GNLY	rs12151621	Wald ratio	1	0.227041	-0.00581696	0.0098242	0.55378	0.9942	0.975239	1.01353	0.21005	877.216	Sun
NCR1	rs2278428	Wald ratio	1	0.080909	0.0199606	0.0337363	0.554074	1.02016	0.954887	1.0899	0.0188171	63.2682	Sun
CAT	rs2745924	Wald ratio	1	0.545062	0.0195354	0.0337909	0.56318	1.01973	0.954379	1.08955	0.0177905	59.7539	Sun
CD200R1	rs6791672	Wald ratio	1	0.590611	-0.0210347	0.0363843	0.56318	0.979185	0.911788	1.05156	0.0149623	50.1105	Sun
PLEKHA7	rs382280	Wald ratio	1	0.121245	-0.0205999	0.0361402	0.568678	0.979611	0.912621	1.05152	0.0163147	54.715	Sun
ICAM5	rs281439	Wald ratio	1	0.7804	-0.00504597	0.00885849	0.568935	0.994967	0.977841	1.01239	0.272593	1236.29	Sun
FABP1	rs2241883	Wald ratio	1	0.30311	-0.0199475	0.0351706	0.570603	0.98025	0.914954	1.05021	0.0153315	51.3661	Sun
SMOC1	rs1958078	Wald ratio	1	0.833946	0.0135458	0.0239044	0.570941	1.01364	0.967242	1.06226	0.0392597	134.81	Sun
FCN2	rs57136797	Wald ratio	1	0.163996	0.00835172	0.0148125	0.57287	1.00839	0.979532	1.03809	0.110426	409.517	Sun
NOG	rs79084672	Wald ratio	1	0.011867	0.015361	0.0274881	0.576282	1.01548	0.962217	1.07169	0.0358803	122.774	Sun
TAPBPL	rs2532497	Wald ratio	1	0.273692	0.0031009	0.00556571	0.57743	1.00311	0.992222	1.01411	0.628879	5590.28	Sun
MPO	rs34097845	Wald ratio	1	0.067304	0.012901	0.0244073	0.597103	1.01298	0.965666	1.06262	0.0413075	142.145	Sun
PI3	rs16989763	Wald ratio	1	0.195049	0.0111821	0.0212993	0.599583	1.01124	0.969898	1.05435	0.044299	152.917	Sun
PYGL	rs35026927	Wald ratio	1	0.008157	-0.0188832	0.035968	0.599583	0.981294	0.914498	1.05297	0.020012	67.3678	Sun
GSTP1	rs1695	Wald ratio	1	0.34538	-0.0196519	0.0376193	0.6014	0.98054	0.910842	1.05557	0.0143431	48.0066	Sun
LILRB1	rs2114511	Wald ratio	1	0.051234	-0.00404298	0.00775365	0.602068	0.995965	0.980944	1.01122	0.31695	1530.81	Sun
SPON1	rs10832169	Wald ratio	1	0.490547	-0.00853789	0.016809	0.611498	0.991498	0.959365	1.02471	0.0702124	249.122	Sun
FCRL6	rs58240276	Wald ratio	1	0.190167	0.00689203	0.01362	0.61284	1.00692	0.980392	1.03416	0.114384	426.091	Sun
IL17RB	rs2232346	Wald ratio	1	0.036587	0.0081232	0.0160772	0.613374	1.00816	0.976883	1.04043	0.0984594	360.292	Sun
GZMB	rs8192917	Wald ratio	1	0.786656	-0.00568182	0.0113636	0.617075	0.994334	0.972433	1.01673	0.150137	582.802	Sun
FAH	rs11555096	Wald ratio	1	0.021281	0.0058436	0.0116872	0.617075	1.00586	0.983081	1.02917	0.147606	571.276	Sun
IL12B	rs4921484	Wald ratio	1	0.678009	0.010887	0.0217739	0.617075	1.01095	0.96871	1.05502	0.0425847	146.735	Sun
PCOLCE	rs9801017	Wald ratio	1	0.635533	0.0156176	0.0312352	0.617075	1.01574	0.955421	1.07987	0.0206836	69.6762	Sun
NOV	rs58936256	Wald ratio	1	0.215178	0.0182254	0.0364508	0.617075	1.01839	0.948173	1.09381	0.0146829	49.1606	Sun
VIT	rs10490666	Wald ratio	1	0.304408	-0.00979545	0.019879	0.622187	0.990252	0.952411	1.0296	0.0510211	177.368	Sun
KLK7	rs2739419	Wald ratio	1	0.908316	-0.00768027	0.015645	0.623491	0.992349	0.962381	1.02325	0.0823369	296.001	Sun
POGLUT1	rs75203710	Wald ratio	1	0.070387	-0.0160102	0.0330368	0.627949	0.984117	0.922413	1.04995	0.0202635	68.2318	Sun
VTN	rs704	Wald ratio	1	0.466647	-0.00303981	0.00627574	0.62812	0.996965	0.984777	1.0093	0.517682	3540.89	Sun
LILRB2	rs373032	Wald ratio	1	0.792018	-0.00571668	0.0118516	0.629555	0.9943	0.971469	1.01767	0.169462	673.122	Sun
FLT4	rs34221241	Wald ratio	1	0.104286	-0.0146006	0.030303	0.629935	0.985506	0.928677	1.04581	0.0246172	83.2618	Sun
TPST1	rs313829	Wald ratio	1	0.688554	-0.0142672	0.0302637	0.637335	0.985834	0.929058	1.04608	0.0229457	77.4757	Sun
RMDN1	rs11781016	Wald ratio	1	0.489299	0.00978844	0.0208399	0.638572	1.00984	0.96942	1.05194	0.0501265	174.094	Sun
CCL22	rs41398344	Wald ratio	1	0.010391	-0.0106807	0.0234976	0.649436	0.989376	0.944844	1.03601	0.0405632	139.476	Sun
IGDCC4	rs35223184	Wald ratio	1	0.011943	0.0122329	0.0269124	0.649436	1.01231	0.960294	1.06714	0.0354853	121.373	Sun
QSOX1	rs12371	Wald ratio	1	0.089018	0.007005	0.0157255	0.655991	1.00703	0.976464	1.03855	0.0793584	284.371	Sun
KLK11	rs1048328	Wald ratio	1	0.08261	-0.00442441	0.0100175	0.65873	0.995585	0.976228	1.01533	0.217499	916.97	Sun
TCN1	rs34528912	Wald ratio	1	0.04157	-0.01055	0.0239133	0.659085	0.989505	0.944197	1.03699	0.0402705	138.427	Sun
H6PD	rs34603401	Wald ratio	1	0.150217	0.00527079	0.011991	0.660255	1.00528	0.981934	1.02919	0.147037	568.694	Sun
BPI	rs1780617	Wald ratio	1	0.12241	0.00651769	0.0150528	0.665022	1.00654	0.977276	1.03668	0.0892174	323.16	Sun
ACP5	rs79061565	Wald ratio	1	0.122794	-0.00846233	0.0200206	0.672528	0.991573	0.953417	1.03126	0.0505704	175.718	Sun
KLK8	rs74705037	Wald ratio	1	0.044509	-0.00861419	0.0204587	0.673717	0.991423	0.952454	1.03199	0.0733593	261.172	Sun
CRISPLD2	rs12921670	Wald ratio	1	0.256992	-0.0126195	0.0302103	0.676151	0.98746	0.930687	1.0477	0.0261148	88.4629	Sun
TDGF1	rs6769392	Wald ratio	1	0.247527	-0.00227015	0.00544835	0.676922	0.997732	0.987135	1.00844	0.650546	6141.43	Sun
AGRP	rs60697456	Wald ratio	1	0.042078	0.0138239	0.0340281	0.684559	1.01392	0.948502	1.08385	0.017823	59.865	Sun
MBL2	rs7899547	Wald ratio	1	0.65277	-0.002849	0.00706975	0.686959	0.997155	0.983433	1.01107	0.407145	2265.6	Sun
OAS1	rs4767027	Wald ratio	1	0.653837	0.0099963	0.0248056	0.686959	1.01005	0.962114	1.06037	0.033024	112.667	Sun
PSAPL1	rs10023470	Wald ratio	1	0.184308	0.0060208	0.0149608	0.687361	1.00604	0.976967	1.03598	0.0903275	327.58	Sun
AMY1A	rs7538379	Wald ratio	1	0.039949	0.00615444	0.0153861	0.689157	1.00617	0.976283	1.03698	0.0829494	298.402	Sun
EDAR	rs116475987	Wald ratio	1	0.015359	-0.00702247	0.0178754	0.694425	0.993002	0.958814	1.02841	0.0742124	264.452	Sun
FAS	rs7911226	Wald ratio	1	0.296971	-0.00743392	0.0189978	0.695572	0.992594	0.956313	1.03025	0.0550819	192.308	Sun
IL5RA	rs77400868	Wald ratio	1	0.13908	0.0072606	0.0188383	0.699929	1.00729	0.970773	1.04517	0.0621894	218.768	Sun
CXCL1	rs2115691	Wald ratio	1	0.239977	-0.00375234	0.00991691	0.70515	0.996255	0.977077	1.01581	0.203113	840.857	Sun
ITIH5	rs7909223	Wald ratio	1	0.747691	-0.00869025	0.0229671	0.70515	0.991347	0.947711	1.03699	0.0391684	134.484	Sun
ADAM23	rs1921673	Wald ratio	1	0.6846	-0.00555427	0.0157371	0.724133	0.994461	0.964255	1.02561	0.0806301	289.327	Sun
GRN	rs5848	Wald ratio	1	0.28735	-0.00904814	0.0260586	0.728424	0.990993	0.941649	1.04292	0.0312665	106.477	Sun
MGAT4B	rs73351608	Wald ratio	1	0.021516	-0.00813687	0.0239933	0.734511	0.991896	0.94633	1.03966	0.0386919	132.782	Sun
CHI3L1	rs10920578	Wald ratio	1	0.522962	0.00204519	0.00623296	0.742817	1.00205	0.98988	1.01436	0.526047	3661.61	Sun
ENTHD2	rs61745945	Wald ratio	1	0.016358	0.0104927	0.0330748	0.75106	1.01055	0.947116	1.07823	0.0247399	83.6874	Sun
NAGPA	rs12599777	Wald ratio	1	0.204198	-0.00622307	0.019866	0.754088	0.993796	0.955844	1.03326	0.0567314	198.413	Sun
HGF	rs5745695	Wald ratio	1	0.760416	0.0113285	0.0365602	0.756668	1.01139	0.941454	1.08653	0.0137416	45.9652	Sun
FAM20A	rs929477	Wald ratio	1	0.093705	-0.00914716	0.0295938	0.757252	0.990895	0.935054	1.05007	0.0234665	79.2762	Sun
ITIH1	rs1042779	Wald ratio	1	0.368712	-0.00309454	0.0100572	0.758316	0.99691	0.977451	1.01676	0.194452	796.35	Sun
RGMB	rs1563317	Wald ratio	1	0.552752	-0.00879223	0.0291532	0.762967	0.991246	0.936194	1.04954	0.0230897	77.9733	Sun
LY9	rs12128261	Wald ratio	1	0.216631	0.00954753	0.0319635	0.765168	1.00959	0.948284	1.07487	0.0196966	66.2846	Sun
SIRPG	rs6043409	Wald ratio	1	0.652477	-0.00761035	0.0254947	0.765316	0.992419	0.944046	1.04327	0.0313206	106.667	Sun
CXCL10	rs11548618	Wald ratio	1	0.008762	-0.0062422	0.0213275	0.769765	0.993777	0.953092	1.0362	0.0641946	226.306	Sun
APOL1	rs71314970	Wald ratio	1	0.105762	0.00874556	0.0300629	0.771121	1.00878	0.95106	1.07001	0.0253243	85.7156	Sun
FCGR2A	rs1801274	Wald ratio	1	0.532574	0.0014529	0.00516587	0.778519	1.00145	0.991365	1.01165	0.764179	10690.4	Sun
GLTPD2	rs34460487	Wald ratio	1	0.346378	-0.00711877	0.0254777	0.779929	0.992907	0.944542	1.04375	0.0322555	109.958	Sun
RPN1	rs2712417	Wald ratio	1	0.618031	0.00522193	0.018857	0.781839	1.00524	0.968761	1.04308	0.0560985	196.068	Sun
BST1	rs73224660	Wald ratio	1	0.158997	0.00171834	0.00630057	0.785063	1.00172	0.989426	1.01417	0.521702	3598.38	Sun
ENTPD1	rs11188501	Wald ratio	1	0.339852	0.00838379	0.0307406	0.785063	1.00842	0.949454	1.07105	0.0206836	69.6762	Sun
CD48	rs12124234	Wald ratio	1	0.405154	0.00682077	0.0253884	0.788194	1.00684	0.957968	1.05821	0.0335686	114.589	Sun
CKM	rs11559024	Wald ratio	1	0.021509	-0.0094284	0.0353565	0.789726	0.990616	0.924292	1.0617	0.019395	65.2498	Sun
NTNG1	rs115668827	Wald ratio	1	0.048772	-0.00388601	0.0149462	0.794864	0.996122	0.967364	1.02573	0.0934558	340.095	Sun
GPC1	rs4074478	Wald ratio	1	0.106437	0.00613642	0.0236016	0.794864	1.00616	0.960672	1.05379	0.034148	116.637	Sun
MMP10	rs17860955	Wald ratio	1	0.021509	-0.00701714	0.0276084	0.799367	0.993007	0.940701	1.04822	0.0318087	108.385	Sun
PCSK1	rs6234	Wald ratio	1	0.260198	0.00164009	0.00646925	0.799866	1.00164	0.989021	1.01442	0.463723	2852.67	Sun
CGB	rs79785970	Wald ratio	1	0.076507	0.0023434	0.00991438	0.813151	1.00235	0.983056	1.02201	0.173948	694.695	Sun
RNASE4	rs12588573	Wald ratio	1	0.224438	-0.00400534	0.017134	0.815166	0.996003	0.96311	1.03002	0.0703087	249.49	Sun
DKK3	rs11022114	Wald ratio	1	0.327961	-0.00505351	0.0217004	0.815857	0.994959	0.953528	1.03819	0.0498837	173.207	Sun
ARFIP1	rs4619875	Wald ratio	1	0.403628	0.00627615	0.0271967	0.817494	1.0063	0.954059	1.06139	0.0274995	93.2861	Sun
SWAP70	rs415895	Wald ratio	1	0.649843	0.00564122	0.0248214	0.820212	1.00566	0.957903	1.05579	0.0321764	109.679	Sun
SNCA	rs2245801	Wald ratio	1	0.788276	-0.0071799	0.0319106	0.821979	0.992846	0.93265	1.05693	0.0209791	70.6932	Sun
PRSS2	rs13229701	Wald ratio	1	0.573919	0.00610022	0.0278867	0.826845	1.00612	0.952602	1.06264	0.0257595	87.2277	Sun
LHB	rs139643250	Wald ratio	1	0.076348	-0.00354872	0.016265	0.827287	0.996458	0.965192	1.02874	0.0645082	227.487	Sun
NTN1	rs72809988	Wald ratio	1	0.110474	0.0036282	0.0169316	0.830324	1.00363	0.970875	1.0375	0.0658424	232.524	Sun
FSTL1	rs1147707	Wald ratio	1	0.389098	0.00662565	0.0312352	0.832012	1.00665	0.946868	1.0702	0.0212256	71.5417	Sun
DNAJC17	rs11549914	Wald ratio	1	0.008278	0.00793067	0.0376094	0.832989	1.00796	0.936333	1.08507	0.0245623	83.0715	Sun
GXYLT1	rs139695917	Wald ratio	1	0.011958	-0.0040504	0.0192876	0.833668	0.995958	0.95901	1.03433	0.0571674	200.03	Sun
PTGDS	rs7019538	Wald ratio	1	0.524107	-0.00707428	0.0338555	0.834483	0.992951	0.9292	1.06107	0.0195367	65.7358	Sun
AKR1A1	rs72688441	Wald ratio	1	0.058959	0.00228814	0.0110169	0.835469	1.00229	0.98088	1.02417	0.154509	602.873	Sun
ART4	rs1001096	Wald ratio	1	0.397358	0.00175676	0.00878378	0.841481	1.00176	0.984659	1.01915	0.262262	1172.78	Sun
IL1RL2	rs2228139	Wald ratio	1	0.069221	0.00588374	0.0305954	0.847501	1.0059	0.947353	1.06807	0.0232642	78.5766	Sun
MATN4	rs11697677	Wald ratio	1	0.253541	0.00609225	0.0317668	0.847914	1.00611	0.945378	1.07075	0.0199887	67.2877	Sun
CRISP2	rs478328	Wald ratio	1	0.454081	0.00210711	0.0110623	0.848936	1.00211	0.980615	1.02407	0.160797	632.113	Sun
LIPN	rs10509554	Wald ratio	1	0.306794	-0.0012789	0.006788	0.850559	0.998722	0.985522	1.0121	0.439495	2586.76	Sun
IDUA	rs3822020	Wald ratio	1	0.636581	-0.00213816	0.0113487	0.850559	0.997864	0.975913	1.02031	0.17104	680.687	Sun
CNTFR	rs10972159	Wald ratio	1	0.017903	-0.00586049	0.0314465	0.85216	0.994157	0.934732	1.05736	0.0172111	57.7739	Sun
CREB3L4	rs4845586	Wald ratio	1	0.46994	0.0043036	0.0246479	0.861391	1.00431	0.956948	1.05402	0.0325476	110.987	Sun
PRSS22	rs3810801	Wald ratio	1	0.332823	-0.00391389	0.022831	0.863887	0.996094	0.952502	1.04168	0.0417473	143.725	Sun
IL6ST	rs11574765	Wald ratio	1	0.115654	0.00446311	0.0262536	0.86501	1.00447	0.954093	1.05751	0.029678	100.902	Sun
IL23R	rs11581607	Wald ratio	1	0.066948	-0.00523809	0.0309524	0.865615	0.994776	0.93622	1.05699	0.022038	74.3417	Sun
SECTM1	rs4789763	Wald ratio	1	0.492828	-0.00392157	0.0235294	0.867632	0.996086	0.951192	1.0431	0.039332	135.069	Sun
LGALS2	rs5756729	Wald ratio	1	0.592511	-0.004	0.024	0.867632	0.996008	0.950241	1.04398	0.0365181	125.039	Sun
RGMA	rs3752102	Wald ratio	1	0.473455	-0.0054672	0.0328032	0.867632	0.994548	0.932616	1.06059	0.0201837	67.9576	Sun
COCH	rs34907608	Wald ratio	1	0.118636	0.00336205	0.0203824	0.868985	1.00337	0.964074	1.04426	0.0473623	164.017	Sun
ISLR2	rs2959011	Wald ratio	1	0.34226	0.00555556	0.0338384	0.86959	1.00557	0.941042	1.07453	0.0176511	59.2771	Sun
POSTN	rs117103342	Wald ratio	1	0.008285	0.00407618	0.0253926	0.872466	1.00408	0.955335	1.05532	0.0368013	126.046	Sun
SIRPB1	rs3848788	Wald ratio	1	0.304983	-0.00147592	0.00925802	0.873338	0.998525	0.98057	1.01681	0.235485	1016.15	Sun
NUDT12	rs74692061	Wald ratio	1	0.156975	-0.00372737	0.0236954	0.875006	0.99628	0.951067	1.04364	0.0373381	127.956	Sun
MXRA7	rs9900613	Wald ratio	1	0.430519	0.00436681	0.0279476	0.875836	1.00438	0.950839	1.06093	0.0257142	87.07	Sun
FAM213A	rs10887868	Wald ratio	1	0.412045	0.00532198	0.0340607	0.875836	1.00534	0.940412	1.07474	0.0171069	57.418	Sun
MAN2B2	rs2301790	Wald ratio	1	0.483846	-0.00299222	0.0194494	0.877731	0.997012	0.959721	1.03575	0.0557865	194.913	Sun
LRPAP1	rs78770234	Wald ratio	1	0.032618	-0.00410497	0.0278552	0.882841	0.995903	0.942989	1.05179	0.0293617	99.7944	Sun
CECR1	rs2231495	Wald ratio	1	0.332516	-0.00113714	0.00773255	0.883086	0.998864	0.983839	1.01412	0.343286	1724.5	Sun
ERAP1	rs17482078	Wald ratio	1	0.216313	-0.00114405	0.00800832	0.886403	0.998857	0.983301	1.01466	0.31344	1506.11	Sun
RNASE2	rs56204594	Wald ratio	1	0.464292	0.00380389	0.0266272	0.886403	1.00381	0.952766	1.05759	0.027847	94.4988	Sun
CA10	rs117399000	Wald ratio	1	0.037436	-0.00454622	0.0319919	0.886997	0.995464	0.934961	1.05988	0.02542	86.0479	Sun
RTN4R	rs75766	Wald ratio	1	0.748115	0.00285878	0.0214408	0.89393	1.00286	0.961592	1.04591	0.0461148	159.487	Sun
IGFLR1	rs12459634	Wald ratio	1	0.144789	0.00171257	0.012987	0.895089	1.00171	0.976538	1.02754	0.121591	456.656	Sun
POFUT1	rs76143353	Wald ratio	1	0.059564	-0.002125	0.0175	0.903352	0.997877	0.96423	1.0327	0.0717006	254.811	Sun
OBP2B	rs4454354	Wald ratio	1	0.786126	-0.00251397	0.0215084	0.906953	0.997489	0.956313	1.04044	0.0430969	148.58	Sun
CFHR5	rs35662416	Wald ratio	1	0.030392	-0.00183303	0.0166639	0.912409	0.998169	0.966094	1.03131	0.0848971	306.059	Sun
EPHA1	rs4421280	Wald ratio	1	0.927083	0.00147761	0.0136395	0.913731	1.00148	0.975061	1.02861	0.104651	385.599	Sun
KYNU	rs3816193	Wald ratio	1	0.180438	-0.00178253	0.016637	0.914676	0.998219	0.966194	1.03131	0.0753964	269.015	Sun
LILRA4	rs2241384	Wald ratio	1	0.170417	0.00291451	0.0284974	0.91854	1.00292	0.948437	1.06053	0.0269623	91.4134	Sun
SIGLEC14	rs1106476	Wald ratio	1	0.116912	-0.000839067	0.00822286	0.918724	0.999161	0.983187	1.0154	0.293292	1369.12	Sun
CHIT1	rs872583	Wald ratio	1	0.20154	0.000728465	0.00728465	0.920344	1.00073	0.986542	1.01512	0.388157	2092.91	Sun
MMP9	rs2250889	Wald ratio	1	0.953378	-0.00241119	0.0241119	0.920344	0.997592	0.951543	1.04587	0.0344038	117.542	Sun
C1RL	rs191448232	Wald ratio	1	0.011905	-0.00167119	0.0172342	0.92275	0.99833	0.965171	1.03263	0.0862591	311.433	Sun
TAPBP	rs144706539	Wald ratio	1	0.015449	0.00115992	0.0126078	0.926698	1.00116	0.976724	1.02621	0.119611	448.206	Sun
PGLYRP1	rs8102493	Wald ratio	1	0.333381	-0.00276753	0.0313653	0.92969	0.997236	0.937777	1.06047	0.0208914	70.3912	Sun
CAPN2	rs373214284	Wald ratio	1	0.006877	-0.00787337	0.0902157	0.930455	0.992158	0.831357	1.18406	0.0203073	68.3826	Sun
KLK14	rs2569491	Wald ratio	1	0.299743	0.00104366	0.0120021	0.930706	1.00104	0.97777	1.02487	0.138746	531.462	Sun
REG4	rs79795228	Wald ratio	1	0.015404	0.00302343	0.0365331	0.934043	1.00303	0.933717	1.07748	0.0191137	64.2847	Sun
APMAP	rs8125909	Wald ratio	1	0.132064	0.00269633	0.033367	0.935595	1.0027	0.939222	1.07047	0.0201807	67.9475	Sun
IL1RL1	rs10179654	Wald ratio	1	0.521017	-0.000589414	0.00742662	0.936742	0.999411	0.984969	1.01406	0.359171	1849.02	Sun
TCN2	rs4820885	Wald ratio	1	0.549103	0.000689941	0.00869325	0.936742	1.00069	0.983784	1.01789	0.260062	1159.48	Sun
LRRN1	rs6801789	Wald ratio	1	0.354026	0.00203252	0.0268293	0.939612	1.00203	0.950704	1.05614	0.027679	93.9124	Sun
NMRAL1	rs11557236	Wald ratio	1	0.082096	0.00183486	0.0244648	0.940215	1.00184	0.954931	1.05105	0.03626	124.122	Sun
CNTN4	rs163352	Wald ratio	1	0.81339	-0.00184672	0.0255463	0.942372	0.998155	0.949407	1.04941	0.0320452	109.217	Sun
HSP90B1	rs1165693	Wald ratio	1	0.321367	-0.000455622	0.00637871	0.943057	0.999544	0.987126	1.01212	0.525286	3650.45	Sun
CCL14	rs9903158	Wald ratio	1	0.05615	0.000924813	0.0129474	0.943057	1.00093	0.975844	1.02665	0.12393	466.679	Sun
NAGK	rs7606102	Wald ratio	1	0.170314	0.00138889	0.0203704	0.945641	1.00139	0.962196	1.04218	0.0527426	183.686	Sun
SPOCK2	rs1245540	Wald ratio	1	0.44884	0.0018357	0.0289123	0.949375	1.00184	0.946644	1.06025	0.0234917	79.3634	Sun
C9	rs62358364	Wald ratio	1	0.0093	-0.00171195	0.02754	0.950434	0.99829	0.945832	1.05366	0.0332606	113.502	Sun
IGFBP3	rs145188037	Wald ratio	1	0.011852	-0.00154904	0.02614	0.952746	0.998452	0.948585	1.05094	0.0249897	84.5538	Sun
SOD3	rs1799895	Wald ratio	1	0.016297	0.000737783	0.0125857	0.953254	1.00074	0.976354	1.02573	0.170232	676.812	Sun
FUT3	rs708686	Wald ratio	1	0.274027	0.000468933	0.00832356	0.955073	1.00047	0.98428	1.01692	0.289496	1344.18	Sun
BCAM	rs144579705	Wald ratio	1	0.009906	0.00170563	0.0351159	0.961261	1.00171	0.935082	1.07308	0.0194865	65.5635	Sun
CBLN1	rs10852587	Wald ratio	1	0.143622	0.000370199	0.00869968	0.966058	1.00037	0.983457	1.01757	0.287188	1329.15	Sun
AKR1B1	rs2229542	Wald ratio	1	0.014337	-0.00134359	0.0342006	0.968663	0.998657	0.933909	1.0679	0.0189438	63.7022	Sun
GGH	rs10957266	Wald ratio	1	0.071297	0.000626174	0.0162805	0.96932	1.00063	0.969201	1.03307	0.0844361	304.244	Sun
ADAMTS13	rs71503194	Wald ratio	1	0.091229	0.000458768	0.0126161	0.970992	1.00046	0.976023	1.02551	0.126052	475.825	Sun
CLEC12A	rs2961544	Wald ratio	1	0.639327	-0.000159477	0.00534248	0.976186	0.999841	0.989426	1.01037	0.725322	8711.44	Sun
LILRB5	rs12975366	Wald ratio	1	0.405252	0.00017231	0.00577238	0.976186	1.00017	0.98892	1.01155	0.649424	6111.22	Sun
LMNB1	rs36105360	Wald ratio	1	0.025189	-0.000497574	0.0248787	0.984043	0.999503	0.951934	1.04945	0.031737	108.132	Sun
PPIE	rs12086750	Wald ratio	1	0.370624	-0.00026096	0.0169624	0.987725	0.999739	0.967048	1.03354	0.0685054	242.62	Sun
ASPH	rs112760834	Wald ratio	1	0.033209	-0.000345781	0.0311203	0.991135	0.999654	0.940502	1.06253	0.021482	72.425	Sun
FAM171B	rs10931256	Wald ratio	1	0.216165	0	0.0227818	1	1	0.95633	1.04566	0.0377131	129.291	Sun
MPO	rs2680703	Wald ratio	1	0.596	0.137143	0.0417143	0.0010102	1.14699	1.05695	1.24471	0.014748	102.671	Yao
MMP9	rs3918249	Wald ratio	1	0.348	-0.109827	0.0381503	0.00399207	0.895989	0.831436	0.965555	0.0135815	94.4384	Yao
CD14	rs3138074	Wald ratio	1	0.777	0.060241	0.021988	0.00614904	1.06209	1.01729	1.10887	0.0381972	272.4	Yao
DPP4	rs10166124	Wald ratio	1	0.687	0.15534	0.0660194	0.0186256	1.16805	1.02628	1.32941	0.00456253	31.4378	Yao
CLEC3B	rs2056320	Wald ratio	1	0.763	0.0798122	0.0361502	0.0272588	1.08308	1.009	1.16261	0.0164082	114.422	Yao
AGER	rs2070600	Wald ratio	1	0.043	-0.0421348	0.0196629	0.0321246	0.958741	0.922494	0.996411	0.0417225	298.634	Yao
GP5	rs1466733	Wald ratio	1	0.737	0.0877193	0.0432749	0.0426596	1.09168	1.0029	1.18832	0.0113356	78.6425	Yao
RETN	rs732457	Wald ratio	1	0.747	0.103448	0.0511494	0.0431276	1.10899	1.0032	1.22593	0.0114438	79.4016	Yao
SERPINA10	rs1950843	Wald ratio	1	0.406	-0.0192308	0.0113636	0.0905873	0.980953	0.959346	1.00305	0.15781	1285.24	Yao
BNPT	rs198379	Wald ratio	1	0.608	-0.0413534	0.0244361	0.0905873	0.95949	0.914619	1.00656	0.0337274	239.411	Yao
LPA	rs55730499	Wald ratio	1	0.939	0.0151394	0.0103586	0.143868	1.01525	0.99485	1.03608	0.180432	1510.04	Yao
CNTN1	rs1838343	Wald ratio	1	0.58	0.0439614	0.0309179	0.155063	1.04494	0.9835	1.11022	0.020876	146.242	Yao
FGG	rs72679193	Wald ratio	1	0.811	0.0650888	0.0485207	0.17977	1.06725	0.970434	1.17373	0.0087556	60.5851	Yao
REG1A	rs11126696	Wald ratio	1	0.612	0.0320755	0.025283	0.204564	1.0326	0.982673	1.08505	0.0333507	236.645	Yao
C2	rs114508013	Wald ratio	1	0.977	-0.0327422	0.0259209	0.206532	0.967788	0.919848	1.01823	0.0241468	169.721	Yao
CD5L	rs2765501	Wald ratio	1	0.608	0.0287719	0.022807	0.207115	1.02919	0.984196	1.07624	0.0387177	276.261	Yao
MCAM	rs11217234	Wald ratio	1	0.718	-0.0541667	0.05	0.27866	0.947274	0.858845	1.04481	0.00839708	58.0833	Yao
CST3	rs911119	Wald ratio	1	0.779	-0.0188295	0.0180662	0.297294	0.981347	0.947206	1.01672	0.0531796	385.246	Yao
GRN	rs850733	Wald ratio	1	0.609	0.0294118	0.0294118	0.317311	1.02985	0.97216	1.09096	0.0232599	163.339	Yao
EFEMP1	rs59985551	Wald ratio	1	0.759	0.0290179	0.0339286	0.392405	1.02944	0.963212	1.10023	0.0183563	128.26	Yao
GMP140	rs9332575	Wald ratio	1	0.894	-0.01296	0.016	0.41794	0.987124	0.956648	1.01857	0.0740344	548.402	Yao
CRP	rs2211320	Wald ratio	1	0.677	-0.0369128	0.0456376	0.418617	0.96376	0.881295	1.05394	0.00970943	67.2499	Yao
HPX	rs7935957	Wald ratio	1	0.788	-0.022619	0.0293651	0.44114	0.977635	0.922955	1.03555	0.0212174	148.685	Yao
KLKB1	rs12639909	Wald ratio	1	0.887	-0.0242902	0.0347003	0.483927	0.976002	0.911829	1.04469	0.0201442	141.01	Yao
ADM	rs2218793	Wald ratio	1	0.704	-0.0422018	0.0642202	0.511089	0.958676	0.845292	1.08727	0.00495162	34.1322	Yao
sICAM1	rs35751322	Wald ratio	1	0.824	0.0326797	0.0535948	0.542023	1.03322	0.93019	1.14766	0.00678973	46.8891	Yao
COL18A1	rs2274809	Wald ratio	1	0.645	0.0216867	0.0415663	0.601852	1.02192	0.941969	1.10867	0.0126193	87.6618	Yao
SAA1	rs11024616	Wald ratio	1	0.809	-0.00769231	0.0155594	0.621036	0.992337	0.962531	1.02307	0.101112	771.542	Yao
BCHE	rs6445035	Wald ratio	1	0.798	0.00744681	0.0170213	0.661749	1.00747	0.974418	1.04165	0.0712164	525.928	Yao
MMP8	rs35231465	Wald ratio	1	0.023	-0.0150943	0.0360206	0.675181	0.985019	0.917874	1.05708	0.0152753	106.398	Yao
GDF15	rs35911336	Wald ratio	1	0.833	0.00637066	0.019112	0.738883	1.00639	0.969389	1.0448	0.0746536	553.36	Yao
CXCL16	rs7221871	Wald ratio	1	0.635	0.0102703	0.0362162	0.776731	1.01032	0.941093	1.08465	0.015865	110.572	Yao
A1M	rs141738059	Wald ratio	1	0.01	0.0122034	0.0542373	0.821979	1.01228	0.91019	1.12582	0.00689238	47.6029	Yao
PON1	rs705379	Wald ratio	1	0.497	-0.00226904	0.0110211	0.836883	0.997734	0.976412	1.01952	0.190338	1612.43	Yao
CP	rs34004251	Wald ratio	1	0.812	0.00532319	0.0319392	0.867632	1.00534	0.944332	1.07028	0.0211181	147.974	Yao
GP130	rs11747625	Wald ratio	1	0.909	0.00490196	0.0326797	0.880765	1.00491	0.942565	1.07139	0.015491	107.924	Yao
UCMGP	rs7135211	Wald ratio	1	0.622	-0.00339623	0.0245283	0.889876	0.99661	0.949831	1.04569	0.033022	234.233	Yao
AGP1	rs2787337	Wald ratio	1	0.381	-0.000735294	0.0507353	0.988437	0.999265	0.904678	1.10374	0.00872416	60.3656	Yao
EAF: Effect Allele Frequency, SNP:Single Nucleotide Polymorphisms, Beta: Effect of protein levels on type 2 diabetes, SE: standard error, MR: Mendelian Randomization, OR: Odds Ratio, CI: Confidence Interval, R2: Variance explained, F: F statistic, Source: the first author of the protein GWAS publication
